# Supplementary material for: Global Health Diplomacy, Monitoring & Evaluation, and the Importance of Quality Assurance & Control: Findings from NIMH Project Accept (HPTN 043): A Phase III Randomized Controlled Trial of Community Mobilization, Mobile Testing, Same-Day Results, and Post-Test Support for HIV in Sub-Saharan Africa and Thailand
Source: PLoS One. 2016 Feb 22;11(2):e0149335. doi: 10.1371/journal.pone.0149335 (PMC4762940; doi:10.1371/journal.pone.0149335)
Supplement: S5 Fig — (XLS) [file pone.0149335.s005.xls]

## Sheet: Thai CM Y-1
Entry Order	Site	Community Name	Venue	Counselor ID	Date of Evaluation	Evaluator	Session Length	CM - Basic Skills	CM - Information	CM - Referrals	GRAND TOTAL	GRAND AVERAGE	Narrative Summary
1	Thailand	2-Maetang #2 (Banchang&Guidchang&In-hta-kin)	06	05	2006-01-05	13	80	4		4	7.8	3.9	TRUE
2	Thailand	2-Maetang #2 (Banchang&Guidchang&In-hta-kin)	11	10	2006-01-06	13	62	4		4	8	4	TRUE
21	Thailand	2-Maetang #2 (Banchang&Guidchang&In-hta-kin)	12	09	2006-01-06	12	60	4		4	8.1	4.05	TRUE
13	Thailand	2-Maetang #2 (Banchang&Guidchang&In-hta-kin)	03	06	2006-01-06	12	75	5		4.7	9.6	4.8	TRUE
3	Thailand	2-Maetang #2 (Banchang&Guidchang&In-hta-kin)	09	07	2006-01-07	13	60	4		4	8	4	TRUE
18	Thailand	2-Maetang #2 (Banchang&Guidchang&In-hta-kin)	14	11	2006-01-11	12	60	4		4.7	8.7	4.35	TRUE
4	Thailand	2-Maetang #2 (Banchang&Guidchang&In-hta-kin)	15	10	2006-01-12	13	75	4		4	8.3	4.15	TRUE
5	Thailand	2-Maetang #2 (Banchang&Guidchang&In-hta-kin)	18	03	2006-01-12	13	60	4		3	6.6	3.3	TRUE
6	Thailand	2-Maetang #2 (Banchang&Guidchang&In-hta-kin)	07	03	2006-01-13	13	50	4		3	6.7	3.35	TRUE
15	Thailand	4-Chiangdao #2(Pingkong subdistric)	01	08	2006-01-13	12	70	4		4.7	9.2	4.6	TRUE
16	Thailand	4-Chiangdao #2(Pingkong subdistric)	02	05	2006-01-14	12	35	3		3.33	6.33	3.17	TRUE
17	Thailand	4-Chiangdao #2(Pingkong subdistric)	11	01	2006-01-22	12	35	4		4.67	8.97	4.49	TRUE
19	Thailand	4-Chiangdao #2(Pingkong subdistric)	13	02	2006-01-22	12	60	4		4.33	8.03	4.02	TRUE
7	Thailand	4-Chiangdao #2(Pingkong subdistric)	03	08	2006-01-22	13	60	4		3	7.1	3.55	TRUE
14	Thailand	4-Chiangdao #2(Pingkong subdistric)	13	01	2006-01-26	12	40	4		4.33	8.53	4.26	TRUE
8	Thailand	4-Chiangdao #2(Pingkong subdistric)	12	11	2006-01-26	13	60	4		3	7.1	3.55	TRUE
9	Thailand	4-Chiangdao #2(Pingkong subdistric)	12	03	2006-01-27	13	40	4		4	8	4	TRUE
10	Thailand	4-Chiangdao #2(Pingkong subdistric)	08	06	2006-01-28	13	63	4		4	8	4	TRUE
11	Thailand	6-Praow #2 (Sunsai&Banpong sub-district)	11	08	2006-01-29	13	47	4		4	8.3	4.15	TRUE
20	Thailand	6-Praow #2 (Sunsai&Banpong sub-district)	14	03	2006-01-29	12	60	4		4	8.1	4.05	TRUE
12	Thailand	6-Praow #2 (Sunsai&Banpong sub-district)	08	04	2006-02-02	13	60	4		3.6	7.4	3.7	TRUE
24	Thailand	6-Praow #2 (Sunsai&Banpong sub-district)	16	1304	2006-02-09	13	53	4		3	6.8	3.4	TRUE
25	Thailand	6-Praow #2 (Sunsai&Banpong sub-district)	17	1206	2006-02-09	12	50	5		4	8.7	4.35	TRUE
28	Thailand	6-Praow #2 (Sunsai&Banpong sub-district)	03	1211	2006-02-10	12	90	4		3	6.8	3.4	TRUE
22	Thailand	8-Chairprakarn #2 (Maethalope sub-district)	07	1309	2006-02-11	13	70	4		3	6.8	3.4	TRUE
23	Thailand	8-Chairprakarn #2 (Maethalope sub-district)	01	1304	2006-02-12	13	60	4		3	6.7	3.35	TRUE
27	Thailand	8-Chairprakarn #2 (Maethalope sub-district)	04	1203	2006-02-16	12	60	4		3	6.8	3.4	TRUE
26	Thailand	8-Chairprakarn #2 (Maethalope sub-district)	02	1208	2006-02-17	12	35	5		3.67	8.37	4.19	TRUE
30	Thailand	9-Fang #1 (MaeKha sub-district)	15	1210	2006-02-23	13	55	4		4.6	9	4.5	TRUE
34	Thailand	9-Fang #1 (MaeKha sub-district)	09	1202	2006-02-23	12	60	4		3.33	7.23	3.62	TRUE
29	Thailand	9-Fang #1 (MaeKha sub-district)	12	1305	2006-02-24	13	105	4		3	6.6	3.3	TRUE
32	Thailand	9-Fang #1 (MaeKha sub-district)	05	1201	2006-02-24	12	70	4		4.33	8.43	4.22	TRUE
33	Thailand	9-Fang #1 (MaeKha sub-district)	04	1209	2006-02-24	12	90	4		4.33	8.43	4.22	TRUE
31	Thailand	9-Fang #1 (MaeKha sub-district)	07	1207	2006-02-26	12	60	4		4	8	4	TRUE
52	Thailand	9-Fang #1 (MaeKha sub-district)	04	03	2006-03-02	1203	40	4		3	6.7	3.35	TRUE
50	Thailand	9-Fang #1 (MaeKha sub-district)	02	08	2006-03-03	1208	60	4		4	8.4	4.2	TRUE
54	Thailand	9-Fang #1 (MaeKha sub-district)	02	01	2006-03-03	1201	95	4		4.33	8.33	4.17	TRUE
37	Thailand	12-Fang #4 (Monpin sub-district)	03	05	2006-03-09	1205	70	4		3.67	7.47	3.74	TRUE
40	Thailand	12-Fang #4 (Monpin sub-district)	09	02	2006-03-09	13	30	4		4	8.1	4.05	TRUE
41	Thailand	12-Fang #4 (Monpin sub-district)	11	01	2006-03-10	1301	60	4		4	8.2	4.1	TRUE
36	Thailand	12-Fang #4 (Monpin sub-district)	11	08	2006-03-10	1208	60	5		5	9.7	4.85	TRUE
42	Thailand	12-Fang #4 (Monpin sub-district)	10	11	2006-03-11	1311	45	4		4.6	9.1	4.55	TRUE
38	Thailand	12-Fang #4 (Monpin sub-district)	04	07	2006-03-11	1207	55	4		4	7.8	3.9	TRUE
53	Thailand	12-Fang #4 (Monpin sub-district)	13	03	2006-03-11	1303	65	4		4	8.2	4.1	TRUE
48	Thailand	12-Fang #4 (Monpin sub-district)	12	10	2006-03-16	1210	50	5		4.67	9.47	4.74	TRUE
39	Thailand	12-Fang #4 (Monpin sub-district)	12	09	2006-03-17	1309	70	5		3	7.6	3.76	TRUE
44	Thailand	12-Fang #4 (Monpin sub-district)	08	06	2006-03-17	13	46	5		4.6	9.2	4.6	TRUE
51	Thailand	12-Fang #4 (Monpin sub-district)	14	04	2006-03-18	1304	53	4		4	8.4	4.2	TRUE
46	Thailand	12-Fang #4 (Monpin sub-district)	05	05	2006-03-18	1205	45	4		4	7.9	3.95	TRUE
47	Thailand	13-Mae-eye #1(Thaton sub-district)	01	11	2006-03-19	1211	60	4		4	8.2	4.1	TRUE
45	Thailand	13-Mae-eye #1(Thaton sub-district)	02	02	2006-03-23	1202	85	5		4	8.3	4.15	TRUE
49	Thailand	13-Mae-eye #1(Thaton sub-district)	05	09	2006-03-24	1209	100	4		3.33	7.13	3.57	TRUE
43	Thailand	13-Mae-eye #1(Thaton sub-district)	05	06	2006-03-26	1301	80	4		4.33	8.63	4.32	TRUE
56	Thailand	2-Maetang #2 (Banchang&Guidchang&In-hta-kin)	06	2305	2006-03-29	2301	36	4		3.8	7.9	3.95	TRUE
59	Thailand	2-Maetang #2 (Banchang&Guidchang&In-hta-kin)	02	2303	2006-03-30	2301	40	4		4	8.1	4.05	TRUE
58	Thailand	2-Maetang #2 (Banchang&Guidchang&In-hta-kin)	06	2305	2006-04-03	2301	35	4		4	8.1	4.05	TRUE
57	Thailand	2-Maetang #2 (Banchang&Guidchang&In-hta-kin)	06	2302	2006-04-07	2301	35	4		4	7.9	3.95	TRUE
83	Thailand	2-Maetang #2 (Banchang&Guidchang&In-hta-kin)	06	10	2006-05-04	13	78	5	3	N/A	8.06	4.03	TRUE
84	Thailand	2-Maetang #2 (Banchang&Guidchang&In-hta-kin)	03	06	2006-05-05	12	60	4	3	N/A	7	3.5	TRUE
82	Thailand	2-Maetang #2 (Banchang&Guidchang&In-hta-kin)	07	07	2006-05-06	13	72	4	4	N/A	8.11	4.06	TRUE
86	Thailand	2-Maetang #2 (Banchang&Guidchang&In-hta-kin)	20	10	2006-05-08	12	120	4	3	N/A	7.53	3.76	TRUE
77	Thailand	2-Maetang #2 (Banchang&Guidchang&In-hta-kin)	16	08	2006-05-11	13	25	4	4	N/A	8.5	4.25	TRUE
88	Thailand	2-Maetang #2 (Banchang&Guidchang&In-hta-kin)	13	02	2006-05-12	12	70	4	5	N/A	8.71	4.36	TRUE
78	Thailand	2-Maetang #2 (Banchang&Guidchang&In-hta-kin)	14	18	2006-05-12	13	60	4	3	N/A	6.55	3.28	TRUE
81	Thailand	2-Maetang #2 (Banchang&Guidchang&In-hta-kin)	18	05	2006-05-18	13	120	4	4	N/A	8	4	TRUE
80	Thailand	4-Chiangdao #2(Pingkong subdistric)	01	06	2006-05-19	13	70	4	4	N/A	8.31	4.15	TRUE
79	Thailand	4-Chiangdao #2(Pingkong subdistric)	01	03	2006-05-19	13	60	4	4	N/A	8.4	4.2	TRUE
87	Thailand	4-Chiangdao #2(Pingkong subdistric)	06	07	2006-05-19	12	120	4	4	N/A	7.8	3.9	TRUE
76	Thailand	4-Chiangdao #2(Pingkong subdistric)	09	04	2006-05-20	13	65	4	4	N/A	8.62	4.31	TRUE
85	Thailand	4-Chiangdao #2(Pingkong subdistric)	02	11	2006-05-21	12	120	5	4	N/A	8.89	4.45	TRUE
89	Thailand	4-Chiangdao #2(Pingkong subdistric)	05	09	2006-05-25	12	90	4	4	N/A	7.58	3.79	TRUE
90	Thailand	4-Chiangdao #2(Pingkong subdistric)	11	01	2006-05-26	12	70	4	4	N/A	8.64	4.32	TRUE
92	Thailand	6-Praow #2 (Sunsai&Banpong sub-district)	10	02	2006-06-02	13	50	4	4	N/A	8.11	4.05	TRUE
107	Thailand	6-Praow #2 (Sunsai&Banpong sub-district)	11	06	2006-06-03	12	150	4.44	4.2	N/A	8.64	4.32	TRUE
91	Thailand	6-Praow #2 (Sunsai&Banpong sub-district)	15	01	2006-06-03	13	30	4	3.2	N/A	7.4	3.7	TRUE
99	Thailand	6-Praow #2 (Sunsai&Banpong sub-district)	15	04	2006-06-04	13	80	4	4	N/A	8.65	4.32	TRUE
106	Thailand	6-Praow #2 (Sunsai&Banpong sub-district)	14	05	2006-06-04	12	120	4.44	4.4	N/A	8.84	4.42	TRUE
101	Thailand	6-Praow #2 (Sunsai&Banpong sub-district)	15	11	2006-06-04	13	90	4.3	4.25	N/A	8.55	4.3	TRUE
93	Thailand	6-Praow #2 (Sunsai&Banpong sub-district)	01	08	2006-06-08	13	68	5	4	N/A	9.06	4.53	TRUE
97	Thailand	6-Praow #2 (Sunsai&Banpong sub-district)	22	18	2006-06-09	13	120	4	4	N/A	7.7	3.85	TRUE
98	Thailand	6-Praow #2 (Sunsai&Banpong sub-district)	07	09	2006-06-09	13	60	4	4	N/A	7.48	3.74	TRUE
96	Thailand	6-Praow #2 (Sunsai&Banpong sub-district)	08	07	2006-06-15	13	60	4	4	N/A	8.08	4.04	TRUE
94	Thailand	6-Praow #2 (Sunsai&Banpong sub-district)	08	03	2006-06-16	13	90	4	4	N/A	8.33	4.2	TRUE
105	Thailand	6-Praow #2 (Sunsai&Banpong sub-district)	02	11	2006-06-16	12	105	4.89	4.4	N/A	9.29	4.65	TRUE
95	Thailand	6-Praow #2 (Sunsai&Banpong sub-district)	05	10	2006-06-17	13	60	4	5	N/A	9.04	4.52	TRUE
104	Thailand	6-Praow #2 (Sunsai&Banpong sub-district)	16	09	2006-06-17	12	85	4.44	3.4	N/A	7.84	3.92	TRUE
103	Thailand	8-Chairprakarn #2 (Maethalope sub-district)	03	06	2006-06-22	13	60	4.66	4.6	N/A	9.26	4.63	TRUE
102	Thailand	8-Chairprakarn #2 (Maethalope sub-district)	02	18	2006-06-23	13	45	4.11	4.2	N/A	8.31	4.15	TRUE
112	Thailand	9-Fang #1 (MaeKha sub-district)	01	02	2006-06-30	13	45	4.4	4.2	N/A	8.6	4.3	TRUE
111	Thailand	9-Fang #1 (MaeKha sub-district)	01	03	2006-06-30	13	45	4.33	4.2	N/A	8.5	4.25	TRUE
108	Thailand	9-Fang #1 (MaeKha sub-district)	13	02	2006-07-06	13	105	4.33	4.2	N/A	8.53	4.3	TRUE
113	Thailand	9-Fang #1 (MaeKha sub-district)	06	06	2006-07-06	13	60	5	4.8	N/A	9.8	4.9	TRUE
110	Thailand	9-Fang #1 (MaeKha sub-district)	04	05	2006-07-07	13	60	4.77	4.8	N/A	9.57	4.78	TRUE
109	Thailand	12-Fang #4 (Monpin sub-district)	12	07	2006-07-14	13	120	4.11	4	N/A	8.11	4.1	TRUE
119	Thailand	13-Mae-eye #1(Thaton sub-district)	02	11	2006-07-21	13	60	4.77	4.6	N/A	9.37	4.68	TRUE
115	Thailand	13-Mae-eye #1(Thaton sub-district)	04	10	2006-07-21	13	65	4.77	4.8	N/A	9.57	4.78	TRUE
116	Thailand	13-Mae-eye #1(Thaton sub-district)	02	01	2006-07-21	13	60	4.66	4.6	N/A	9.26	4.63	TRUE
114	Thailand	13-Mae-eye #1(Thaton sub-district)	03	18	2006-07-22	08	60	4.67	4.4	N/A	9.07	4.54	TRUE
117	Thailand	13-Mae-eye #1(Thaton sub-district)	10	04	2006-07-22	13	70	4.77	4.6	N/A	9.37	4.68	TRUE
118	Thailand	13-Mae-eye #1(Thaton sub-district)	10	09	2006-07-22	13	70	4.66	4.6	N/A	9.26	4.63	TRUE
120	Thailand	13-Mae-eye #1(Thaton sub-district)	04	08	2006-07-27	13	60	4.88	4.8	N/A	9.68	4.84	TRUE
121	Thailand	13-Mae-eye #1(Thaton sub-district)	05	07	2006-07-28	13	40	4.66	4.6	N/A	9.26	4.63	TRUE
122	Thailand	13-Mae-eye #1(Thaton sub-district)	09	03	2006-07-30	13	40	4.66	4.8	N/A	9.46	4.73	TRUE
130	Thailand	2-Maetang #2 (Banchang&Guidchang&In-hta-kin)	01	09	2006-09-02	13	80	4.7	4.6	N/A	9.3	4.65	TRUE
132	Thailand	2-Maetang #2 (Banchang&Guidchang&In-hta-kin)	01	06	2006-09-02	13	80	4.88	4.6	N/A	9.48	4.74	TRUE
131	Thailand	2-Maetang #2 (Banchang&Guidchang&In-hta-kin)	01	10	2006-09-02	13	80	5	4.6	N/A	9.6	4.8	TRUE
126	Thailand	2-Maetang #2 (Banchang&Guidchang&In-hta-kin)	11	08	2006-09-04	13	30	4.7	4.6	N/A	9.4	4.7	TRUE
127	Thailand	2-Maetang #2 (Banchang&Guidchang&In-hta-kin)	11	11	2006-09-04	13	40	4.7	4.6	N/A	9.4	4.7	TRUE
128	Thailand	2-Maetang #2 (Banchang&Guidchang&In-hta-kin)	11	05	2006-09-04	13	40	4.77	4.6	N/A	9.4	4.7	TRUE
129	Thailand	2-Maetang #2 (Banchang&Guidchang&In-hta-kin)	11	02	2006-09-04	13	40	4.77	4.6	N/A	9.4	4.7	TRUE
125	Thailand	2-Maetang #2 (Banchang&Guidchang&In-hta-kin)	11	04	2006-09-04	13	30	4.66	4.6	N/A	9.26	4.6	TRUE
123	Thailand	2-Maetang #2 (Banchang&Guidchang&In-hta-kin)	09	18	2006-09-11	13	42	4.7	4.6	N/A	9.3	4.7	TRUE
124	Thailand	2-Maetang #2 (Banchang&Guidchang&In-hta-kin)	09	01	2006-09-11	13	42	4.7	4.6	N/A	9.3	4.7	TRUE
134	Thailand	4-Chiangdao #2(Pingkong subdistric)	05	11	2006-09-19	13	80	4.88	4.6	N/A	9.48	4.74	TRUE
135	Thailand	4-Chiangdao #2(Pingkong subdistric)	05	09	2006-09-19	13	80	4.88	4.8	N/A	9.68	4.84	TRUE
147	Thailand	6-Praow #2 (Sunsai&Banpong sub-district)	11	06	2006-10-01	08	60	5	4.8	N/A	9.8	4.9	TRUE
139	Thailand	6-Praow #2 (Sunsai&Banpong sub-district)	10	07	2006-10-01	10	120	4.6	4.6	N/A	9.2	4.6	TRUE
143	Thailand	6-Praow #2 (Sunsai&Banpong sub-district)	12	18	2006-10-02	08	60	4.77	4.6	N/A	9.37	4.7	TRUE
142	Thailand	6-Praow #2 (Sunsai&Banpong sub-district)	19	03	2006-10-02	10	105	4.6	4.6	N/A	9.2	4.6	TRUE
138	Thailand	6-Praow #2 (Sunsai&Banpong sub-district)	14	09	2006-10-03	13	70	4.7	4.8	N/A	9.5	4.75	TRUE
141	Thailand	6-Praow #2 (Sunsai&Banpong sub-district)	14	11	2006-10-03	13	70	4.8	4.8	N/A	9.6	4.8	TRUE
144	Thailand	6-Praow #2 (Sunsai&Banpong sub-district)	22	05	2006-10-03	08	60	5	4.8	N/A	9.8	4.9	TRUE
140	Thailand	6-Praow #2 (Sunsai&Banpong sub-district)	03	06	2006-10-08	13	60	4.9	4.6	N/A	9.5	4.8	TRUE
137	Thailand	6-Praow #2 (Sunsai&Banpong sub-district)	06	02	2006-10-09	13	60	4.8	4.8	N/A	9.6	4.8	TRUE
148	Thailand	6-Praow #2 (Sunsai&Banpong sub-district)	07	04	2006-10-15	13	60	4.8	4.8	N/A	9.6	4.8	TRUE
146	Thailand	6-Praow #2 (Sunsai&Banpong sub-district)	07	01	2006-10-15	13	60	4.7	4.8	N/A	9.5	4.7	TRUE
145	Thailand	6-Praow #2 (Sunsai&Banpong sub-district)	01	10	2006-10-16	13	90	5	4.8	N/A	9.8	4.9	TRUE
149	Thailand	6-Praow #2 (Sunsai&Banpong sub-district)	01	08	2006-10-16	13	90	5	4.8	N/A	9.8	4.9	TRUE
155	Thailand	9-Fang #1 (MaeKha sub-district)	10	07	2006-10-28	13	90	4.8	4.6	N/A	9.4	4.7	TRUE
154	Thailand	9-Fang #1 (MaeKha sub-district)	10	02	2006-10-28	13	90	4.8	4.8	N/A	9.6	4.8	TRUE
153	Thailand	9-Fang #1 (MaeKha sub-district)	10	10	2006-10-28	13	90	4.9	4.8	N/A	9.7	4.85	TRUE
156	Thailand	9-Fang #1 (MaeKha sub-district)	14	04	2006-10-29	13	60	4.8	4.8	N/A	9.6	4.8	TRUE
162	Thailand	12-Fang #4 (Monpin sub-district)	02	11	2006-11-11	13	45	4.8	4.8	N/A	9.6	4.8	TRUE
157	Thailand	12-Fang #4 (Monpin sub-district)	02	01	2006-11-11	13	45	4.8	4.8	N/A	9.6	4.8	TRUE
159	Thailand	12-Fang #4 (Monpin sub-district)	06	08	2006-11-12	13	60	5	4.8	N/A	9.8	4.9	TRUE
158	Thailand	12-Fang #4 (Monpin sub-district)	12	06	2006-11-12	13	60	4.88	4.8	N/A	9.68	4.84	TRUE
160	Thailand	12-Fang #4 (Monpin sub-district)	06	08	2006-11-19	13	95	4.9	4.8	N/A	9.7	4.85	TRUE
161	Thailand	12-Fang #4 (Monpin sub-district)	06	06	2006-11-19	13	95	4.9	4.8	N/A	9.7	4.85	TRUE
151	Thailand	13-Mae-eye #1(Thaton sub-district)	10	09	2006-11-26	13	50	4.8	4.8	N/A	9.6	4.8	TRUE
152	Thailand	13-Mae-eye #1(Thaton sub-district)	10	11	2006-11-26	13	50	4.9	4.8	N/A	9.7	4.9	TRUE
							AVG	4.37864	4.39819	3.87632	8.57136	4.28764

## Sheet: Thai CM Y-2
Entry Order	Site	Community Name	Venue	Counselor ID	Date of Evaluation	Evaluator	Session Length	CM - Basic Skills	CM - Information	CM - Referrals	GRAND TOTAL	GRAND AVERAGE	Narrative Summary
165	Thailand	8-Chairprakarn #2 (Maethalope sub-district)	02	06	2007-02-01	13	60	5	4.6	N/A	9.6	4.8	TRUE
163	Thailand	8-Chairprakarn #2 (Maethalope sub-district)	02	08	2007-02-01	13	60	5	4.6	N/A	9.6	4.8	TRUE
164	Thailand	8-Chairprakarn #2 (Maethalope sub-district)	02	09	2007-02-01	13	60	4.88	4.6	N/A	9.48	4.74	TRUE
168	Thailand	2-Maetang #2 (Banchang&Guidchang&In-hta-kin)	01	21	2007-02-20	13	50	4.55	3.6	N/A	8.15	4.1	TRUE
167	Thailand	2-Maetang #2 (Banchang&Guidchang&In-hta-kin)	01	04	2007-02-20	13	60	4.88	4.6	N/A	9.48	4.74	TRUE
166	Thailand	2-Maetang #2 (Banchang&Guidchang&In-hta-kin)	01	02	2007-02-20	13	60	4.88	4.4	N/A	9.28	4.64	TRUE
169	Thailand	2-Maetang #2 (Banchang&Guidchang&In-hta-kin)	02	05	2007-02-21	13	60	4.88	4.4	N/A	9.28	4.64	TRUE
170	Thailand	2-Maetang #2 (Banchang&Guidchang&In-hta-kin)	02	07	2007-02-21	13	60	4.88	4.4	N/A	9.28	4.64	TRUE
171	Thailand	2-Maetang #2 (Banchang&Guidchang&In-hta-kin)	11	18	2007-02-25	13	60	4.77	4.4	N/A	9.57	4.78	TRUE
172	Thailand	2-Maetang #2 (Banchang&Guidchang&In-hta-kin)	11	01	2007-02-25	13	60	4.88	4.6	N/A	9.48	4.74	TRUE
173	Thailand	4-Chiangdao #2(Pingkong subdistric)	07	20	2007-03-04	13	90	4.33	4.4	N/A	8.73	4.37	TRUE
174	Thailand	4-Chiangdao #2(Pingkong subdistric)	07	19	2007-03-04	13	90	4.55	4.2	N/A	8.75	4.38	TRUE
175	Thailand	4-Chiangdao #2(Pingkong subdistric)	07	21	2007-03-04	13	90	4.55	4.2	N/A	8.75	4.38	TRUE
176	Thailand	4-Chiangdao #2(Pingkong subdistric)	11	08	2007-03-11	13	60	4.88	4.6	N/A	9.48	4.74	TRUE
177	Thailand	4-Chiangdao #2(Pingkong subdistric)	11	05	2007-03-11	13	60	4.77	4.2	N/A	8.97	4.49	TRUE
179	Thailand	6-Praow #2 (Sunsai&Banpong sub-district)	03	06	2007-03-18	13	120	4.88	4.2	N/A	9.08	4.54	TRUE
178	Thailand	6-Praow #2 (Sunsai&Banpong sub-district)	03	09	2007-03-18	13	120	4.77	4.2	N/A	8.97	4.49	TRUE
180	Thailand	6-Praow #2 (Sunsai&Banpong sub-district)	09	04	2007-03-20	13	90	4.88	4.6	N/A	9.48	4.74	TRUE
181	Thailand	6-Praow #2 (Sunsai&Banpong sub-district)	09	02	2007-03-20	13	90	4.77	4.6	N/A	9.37	4.69	TRUE
182	Thailand	6-Praow #2 (Sunsai&Banpong sub-district)	09	07	2007-03-20	13	90	4.77	4.2	N/A	8.97	4.49	TRUE
183	Thailand	6-Praow #2 (Sunsai&Banpong sub-district)	23	09	2007-04-01	13	75	4.77	4.4	N/A	9.17	4.59	TRUE
184	Thailand	6-Praow #2 (Sunsai&Banpong sub-district)	23	06	2007-04-01	13	75	4.88	4.4	N/A	9.28	4.64	TRUE
187	Thailand	12-Fang #4 (Monpin sub-district)	02	07	2007-04-23	13	60	4.88	4.6	N/A	9.48	4.74	TRUE
185	Thailand	12-Fang #4 (Monpin sub-district)	02	20	2007-04-23	13	40	4.66	4.6	N/A	9.26	4.63	TRUE
186	Thailand	12-Fang #4 (Monpin sub-district)	02	02	2007-04-23	13	60	4.77	4.6	N/A	9.37	4.69	TRUE
190	Thailand	12-Fang #4 (Monpin sub-district)	06	04	2007-04-25	13	40	4.88	4.6	N/A	9.48	4.74	TRUE
188	Thailand	12-Fang #4 (Monpin sub-district)	06	05	2007-04-25	13	45	4.88	4.6	N/A	9.48	4.74	TRUE
189	Thailand	12-Fang #4 (Monpin sub-district)	06	19	2007-04-25	13	40	4.77	4.6	N/A	9.37	4.69	TRUE
191	Thailand	12-Fang #4 (Monpin sub-district)	12	08	2007-04-30	13	60	4.88	4.6	N/A	9.48	4.74	TRUE
192	Thailand	12-Fang #4 (Monpin sub-district)	12	21	2007-04-30	13	50	4.77	4.8	N/A	9.57	4.79	TRUE
193	Thailand	9-Fang #1 (MaeKha sub-district)	04	21	2007-05-07	13	120	4.9	4.6	N/A	9.5	4.75	TRUE
194	Thailand	9-Fang #1 (MaeKha sub-district)	04	02	2007-05-07	13	120	4.9	4.8	N/A	9.7	4.85	TRUE
196	Thailand	9-Fang #1 (MaeKha sub-district)	02	07	2007-05-08	13	50	4.8	4.6	N/A	9.4	4.7	TRUE
195	Thailand	9-Fang #1 (MaeKha sub-district)	02	09	2007-05-08	13	50	4.9	4.6	N/A	9.5	4.75	TRUE
202	Thailand	9-Fang #1 (MaeKha sub-district)	02	19	2007-05-08	13	40	4.2	4.4	N/A	8.6	4.3	TRUE
197	Thailand	9-Fang #1 (MaeKha sub-district)	09	08	2007-05-14	13	50	5	4.4	N/A	9.4	4.7	TRUE
198	Thailand	2-Maetang #2 (Banchang&Guidchang&In-hta-kin)	15	05	2007-05-19	13	120	4.9	4.2	N/A	9.1	4.55	TRUE
199	Thailand	2-Maetang #2 (Banchang&Guidchang&In-hta-kin)	15	06	2007-05-19	13	120	4.9	4.4	N/A	9.3	4.65	TRUE
200	Thailand	13-Mae-eye #1(Thaton sub-district)	02	04	2007-05-21	13	60	4.8	4.6	N/A	9.4	4.7	TRUE
201	Thailand	13-Mae-eye #1(Thaton sub-district)	02	09	2007-05-21	13	60	4.9	4.2	N/A	9.1	4.55	TRUE
203	Thailand	13-Mae-eye #1(Thaton sub-district)	04	20	2007-05-28	13	60	4.8	4.4	N/A	9.2	4.6	TRUE
205	Thailand	8-Chairprakarn #2 (Maethalope sub-district)	01	09	2007-06-25	13	40	4.77	4	N/A	8.77	4.39	TRUE
204	Thailand	8-Chairprakarn #2 (Maethalope sub-district)	01	07	2007-06-25	13	45	4.88	4	N/A	8.88	4.44	TRUE
206	Thailand	8-Chairprakarn #2 (Maethalope sub-district)	01	10	2007-06-25	13	45	5	3.8	N/A	8.8	4.4	TRUE
207	Thailand	8-Chairprakarn #2 (Maethalope sub-district)	02	08	2007-06-26	13	50	5	4.4	N/A	9.4	4.7	TRUE
208	Thailand	8-Chairprakarn #2 (Maethalope sub-district)	04	20	2007-07-02	13	60	4.6	4.4	N/A	9	4.5	TRUE
209	Thailand	8-Chairprakarn #2 (Maethalope sub-district)	04	22	2007-07-02	13	60	4.44	4	N/A	8.44	4.22	TRUE
210	Thailand	2-Maetang #2 (Banchang&Guidchang&In-hta-kin)	05	19	2007-07-16	13	80	4.6	4.4	N/A	9	4.5	TRUE
211	Thailand	2-Maetang #2 (Banchang&Guidchang&In-hta-kin)	05	05	2007-07-16	13	80	4.77	4.4	N/A	9.17	4.59	TRUE
213	Thailand	2-Maetang #2 (Banchang&Guidchang&In-hta-kin)	09	04	2007-07-17	13	65	4.77	4.4	N/A	9.17	4.59	TRUE
212	Thailand	2-Maetang #2 (Banchang&Guidchang&In-hta-kin)	09	02	2007-07-17	13	55	4.77	4.4	N/A	9.17	4.59	TRUE
216	Thailand	2-Maetang #2 (Banchang&Guidchang&In-hta-kin)	19	05	2007-07-30	13	80	4.88	4.6	N/A	9.48	4.74	TRUE
214	Thailand	2-Maetang #2 (Banchang&Guidchang&In-hta-kin)	19	09	2007-07-30	13	80	4.88	4.6	N/A	9.48	4.74	TRUE
215	Thailand	2-Maetang #2 (Banchang&Guidchang&In-hta-kin)	19	10	2007-07-30	13	80	4.88	4.6	N/A	9.48	4.74	TRUE
217	Thailand	2-Maetang #2 (Banchang&Guidchang&In-hta-kin)	01	22	2007-07-31	13	50	4.77	4.4	N/A	9.17	4.59	TRUE
218	Thailand	2-Maetang #2 (Banchang&Guidchang&In-hta-kin)	01	08	2007-07-31	13	50	5	4.8	N/A	9.8	4.9	TRUE
219	Thailand	4-Chiangdao #2(Pingkong subdistric)	04	20	2007-08-06	13	80	4.77	4.8	N/A	9.57	4.79	TRUE
220	Thailand	4-Chiangdao #2(Pingkong subdistric)	04	02	2007-08-06	13	80	5	4.8	N/A	9.8	4.9	TRUE
221	Thailand	4-Chiangdao #2(Pingkong subdistric)	13	07	2007-08-13	13	70	4.88	4.8	N/A	9.68	4.84	TRUE
223	Thailand	4-Chiangdao #2(Pingkong subdistric)	13	04	2007-08-13	13	50	5	4.8	N/A	9.8	4.9	TRUE
222	Thailand	4-Chiangdao #2(Pingkong subdistric)	13	19	2007-08-13	13	70	4.88	4.8	N/A	9.68	4.84	TRUE
224	Thailand	6-Praow #2 (Sunsai&Banpong sub-district)	11	10	2007-08-21	13	60	5	4.4	N/A	9.4	4.7	TRUE
225	Thailand	6-Praow #2 (Sunsai&Banpong sub-district)	11	07	2007-08-21	13	60	4.88	4.4	N/A	9.28	4.64	TRUE
226	Thailand	6-Praow #2 (Sunsai&Banpong sub-district)	12	09	2007-08-28	13	120	4.88	4.8	N/A	9.68	4.84	TRUE
227	Thailand	6-Praow #2 (Sunsai&Banpong sub-district)	12	08	2007-08-28	13	120	5	4.8	N/A	9.8	4.9	TRUE
228	Thailand	6-Praow #2 (Sunsai&Banpong sub-district)	12	06	2007-08-28	13	120	4.88	4.8	N/A	9.68	4.84	TRUE
232	Thailand	12-Fang #4 (Monpin sub-district)	07	04	2007-09-03	13	75	5	4.4	N/A	9.4	4.7	TRUE
231	Thailand	12-Fang #4 (Monpin sub-district)	07	19	2007-09-03	13	75	4.77	4.2	N/A	8.97	4.49	TRUE
230	Thailand	12-Fang #4 (Monpin sub-district)	07	05	2007-09-03	13	60	4.88	4.4	N/A	9.28	4.64	TRUE
229	Thailand	12-Fang #4 (Monpin sub-district)	07	20	2007-09-03	13	60	4.77	4.4	N/A	9.17	4.59	TRUE
233	Thailand	12-Fang #4 (Monpin sub-district)	05	02	2007-09-12	13	90	4.88	4.4	N/A	9.28	4.64	TRUE
234	Thailand	12-Fang #4 (Monpin sub-district)	05	22	2007-09-12	13	90	4.77	4.4	N/A	9.17	4.59	TRUE
236	Thailand	12-Fang #4 (Monpin sub-district)	12	10	2007-09-17	13	140	5	4.4	N/A	9.4	4.7	TRUE
235	Thailand	12-Fang #4 (Monpin sub-district)	12	06	2007-09-17	13	140	5	4.4	N/A	9.4	4.7	TRUE
238	Thailand	9-Fang #1 (MaeKha sub-district)	10	08	2007-09-24	13	90	5	4.4	N/A	9.4	4.7	TRUE
237	Thailand	9-Fang #1 (MaeKha sub-district)	10	07	2007-09-24	13	90	4.88	4.4	N/A	9.28	4.64	TRUE
239	Thailand	9-Fang #1 (MaeKha sub-district)	02	09	2007-10-01	13	120	4.77	4.4	N/A	9.17	4.59	TRUE
240	Thailand	9-Fang #1 (MaeKha sub-district)	02	04	2007-10-01	13	120	4.88	4.4	N/A	9.28	4.64	TRUE
241	Thailand	9-Fang #1 (MaeKha sub-district)	12	19	2007-10-02	13	90	4.77	4.2	N/A	8.97	4.49	TRUE
242	Thailand	9-Fang #1 (MaeKha sub-district)	12	20	2007-10-02	13	90	4.77	4.2	N/A	8.97	4.49	TRUE
243	Thailand	13-Mae-eye #1(Thaton sub-district)	04	22	2007-10-08	13	120	4.66	4.6	N/A	9.26	4.63	TRUE
244	Thailand	13-Mae-eye #1(Thaton sub-district)	04	05	2007-10-08	13	120	4.77	4.8	N/A	9.57	4.79	TRUE
245	Thailand	13-Mae-eye #1(Thaton sub-district)	04	06	2007-10-15	13	120	5	4.4	N/A	9.4	4.7	TRUE
246	Thailand	13-Mae-eye #1(Thaton sub-district)	04	08	2007-10-15	13	120	5	4.4	N/A	9.4	4.7	TRUE
248	Thailand	12-Fang #4 (Monpin sub-district)	14	09	2007-10-22	13	90	4.77	4.4	N/A	9.17	4.59	TRUE
247	Thailand	12-Fang #4 (Monpin sub-district)	14	07	2007-10-22	13	90	4.77	4.4	N/A	9.17	4.59	TRUE
249	Thailand	4-Chiangdao #2(Pingkong subdistric)	04	22	2007-10-24	13	60	4.66	4.4	N/A	9.06	4.53	TRUE
250	Thailand	8-Chairprakarn #2 (Maethalope sub-district)	07	08	2007-11-05	13	150	5	4.4	N/A	9.4	4.7	TRUE
251	Thailand	8-Chairprakarn #2 (Maethalope sub-district)	07	10	2007-11-05	13	150	5	4.4	N/A	9.4	4.7	TRUE
252	Thailand	8-Chairprakarn #2 (Maethalope sub-district)	04	05	2007-11-12	13	90	4.88	4.2	N/A	9.08	4.54	TRUE
253	Thailand	8-Chairprakarn #2 (Maethalope sub-district)	04	02	2007-11-12	13	90	4.88	4.2	N/A	9.08	4.54	TRUE
255	Thailand	2-Maetang #2 (Banchang&Guidchang&In-hta-kin)	05	21	2007-11-19	13	120	4.88	4.4	N/A	9.28	4.64	TRUE
254	Thailand	2-Maetang #2 (Banchang&Guidchang&In-hta-kin)	05	06	2007-11-19	13	120	5	4.4	N/A	9.4	4.7	TRUE
256	Thailand	2-Maetang #2 (Banchang&Guidchang&In-hta-kin)	08	05	2007-12-03	13	120	5	4	N/A	9	4.5	TRUE
257	Thailand	2-Maetang #2 (Banchang&Guidchang&In-hta-kin)	08	10	2007-12-03	13	120	5	4.2	N/A	9.2	4.6	TRUE
258	Thailand	2-Maetang #2 (Banchang&Guidchang&In-hta-kin)	18	20	2007-12-04	13	120	4.77	4.2	N/A	8.97	4.49	TRUE
259	Thailand	2-Maetang #2 (Banchang&Guidchang&In-hta-kin)	10	07	2007-12-10	13	105	4.77	4.2	N/A	8.97	4.49	TRUE
260	Thailand	2-Maetang #2 (Banchang&Guidchang&In-hta-kin)	10	08	2007-12-10	13	105	5	4.4	N/A	9.4	4.7	TRUE
261	Thailand	2-Maetang #2 (Banchang&Guidchang&In-hta-kin)	11	21	2007-12-12	13	90	4.8	4.2	N/A	9	4.5	TRUE
262	Thailand	2-Maetang #2 (Banchang&Guidchang&In-hta-kin)	11	04	2007-12-12	13	90	5	4.2	N/A	9.2	4.6	TRUE
							AVG	4.8382	4.428		9.2702	4.6367

## Sheet: Thai CM Y-3
Entry Order	Site	Community Name	Venue	Counselor ID	Date of Evaluation	Evaluator	Session Length	CM - Basic Skills	CM - Information	CM - Referrals	GRAND TOTAL	GRAND AVERAGE	Narrative Summary
264	Thailand	4-Chiangdao #2(Pingkong subdistric)	05	10	2008-01-07	13	180	5	4.4	N/A	9.4	4.7	TRUE
265	Thailand	4-Chiangdao #2(Pingkong subdistric)	05	21	2008-01-07	13	180	4.88	4.4	N/A	9.28	4.64	TRUE
263	Thailand	4-Chiangdao #2(Pingkong subdistric)	05	11	2008-01-07	13	180	5	4.2	N/A	9.2	4.6	TRUE
267	Thailand	4-Chiangdao #2(Pingkong subdistric)	04	20	2008-01-14	13	150	4.77	4.4	N/A	9.17	4.59	TRUE
266	Thailand	4-Chiangdao #2(Pingkong subdistric)	04	04	2008-01-14	13	150	5	4.4	N/A	9.4	4.7	TRUE
268	Thailand	4-Chiangdao #2(Pingkong subdistric)	13	06	2008-01-21	13	120	5	4.4	N/A	9.4	4.7	TRUE
269	Thailand	4-Chiangdao #2(Pingkong subdistric)	13	02	2008-01-21	13	120	4.88	4.4	N/A	9.28	4.64	TRUE
270	Thailand	6-Praow #2 (Sunsai&Banpong sub-district)	13	08	2008-02-04	13	90	4.88	4.4	N/A	9.28	4.64	TRUE
271	Thailand	6-Praow #2 (Sunsai&Banpong sub-district)	08	06	2008-02-11	13	120	4.7	4.6	N/A	9.3	4.65	TRUE
272	Thailand	6-Praow #2 (Sunsai&Banpong sub-district)	08	05	2008-02-11	13	120	5	4.4	N/A	9.4	4.7	TRUE
273	Thailand	6-Praow #2 (Sunsai&Banpong sub-district)	03	11	2008-02-18	13	120	5	4	N/A	9	4.5	TRUE
274	Thailand	6-Praow #2 (Sunsai&Banpong sub-district)	03	04	2008-02-18	13	120	5	4	N/A	9	4.5	TRUE
276	Thailand	2-Maetang #2 (Banchang&Guidchang&In-hta-kin)	20	21	2008-02-20	13	120	4.88	4	N/A	8.88	4.44	TRUE
275	Thailand	2-Maetang #2 (Banchang&Guidchang&In-hta-kin)	20	20	2008-02-20	13	120	4.77	3.8	N/A	8.57	4.29	TRUE
277	Thailand	6-Praow #2 (Sunsai&Banpong sub-district)	11	02	2008-02-25	13	120	4.88	4.4	N/A	9.28	4.64	TRUE
278	Thailand	6-Praow #2 (Sunsai&Banpong sub-district)	11	10	2008-02-25	13	120	5	4	N/A	9	4.5	TRUE
279	Thailand	12-Fang #4 (Monpin sub-district)	11	08	2008-03-03	13	120	4.88	4.4	N/A	9.28	4.64	TRUE
280	Thailand	12-Fang #4 (Monpin sub-district)	11	04	2008-03-03	13	120	4.88	4.4	N/A	9.28	4.64	TRUE
281	Thailand	12-Fang #4 (Monpin sub-district)	06	02	2008-03-04	13	120	4.77	4.4	N/A	9.17	4.59	TRUE
282	Thailand	12-Fang #4 (Monpin sub-district)	06	10	2008-03-04	13	120	5	4.4	N/A	9.4	4.7	TRUE
283	Thailand	12-Fang #4 (Monpin sub-district)	06	06	2008-03-10	13	120	5	4	N/A	9	4.5	TRUE
284	Thailand	12-Fang #4 (Monpin sub-district)	09	05	2008-03-11	13	130	4.88	4.2	N/A	9.08	4.54	TRUE
285	Thailand	12-Fang #4 (Monpin sub-district)	14	20	2008-03-18	13	150	4.66	4.2	N/A	8.86	4.43	TRUE
286	Thailand	12-Fang #4 (Monpin sub-district)	12	21	2008-03-19	13	150	4.77	4.4	N/A	9.17	4.59	TRUE
287	Thailand	12-Fang #4 (Monpin sub-district)	01	11	2008-03-25	13	120	4.88	4.4	N/A	9.28	4.64	TRUE
288	Thailand	13-Mae-eye #1(Thaton sub-district)	02	04	2008-04-02	13	120	5	4.4	N/A	9.4	4.7	TRUE
289	Thailand	13-Mae-eye #1(Thaton sub-district)	02	10	2008-04-02	13	120	5	4.2	N/A	9.2	4.6	TRUE
290	Thailand	13-Mae-eye #1(Thaton sub-district)	05	02	2008-04-07	13	120	4.88	4	N/A	8.88	4.44	TRUE
291	Thailand	13-Mae-eye #1(Thaton sub-district)	05	21	2008-04-07	13	120	4.77	4	N/A	8.77	4.39	TRUE
293	Thailand	13-Mae-eye #1(Thaton sub-district)	08	20	2008-04-21	13	150	4.78	4.4	N/A	9.18	4.59	TRUE
292	Thailand	13-Mae-eye #1(Thaton sub-district)	08	06	2008-04-21	13	150	4.89	4.4	N/A	9.29	4.65	TRUE
294	Thailand	9-Fang #1 (MaeKha sub-district)	10	21	2008-05-12	13	120	4.77	4.4	N/A	9.17	4.59	TRUE
295	Thailand	9-Fang #1 (MaeKha sub-district)	10	11	2008-05-12	13	120	4.77	4.6	N/A	9.37	4.69	TRUE
296	Thailand	9-Fang #1 (MaeKha sub-district)	15	10	2008-05-13	13	120	5	4.4	N/A	9.4	4.7	TRUE
297	Thailand	9-Fang #1 (MaeKha sub-district)	15	06	2008-05-13	13	120	5	4.4	N/A	9.4	4.7	TRUE
298	Thailand	9-Fang #1 (MaeKha sub-district)	13	02	2008-05-19	13	120	4.66	4.4	N/A	9.06	4.53	TRUE
299	Thailand	9-Fang #1 (MaeKha sub-district)	04	20	2008-05-20	13	150	4.66	4.2	N/A	8.86	4.43	TRUE
300	Thailand	9-Fang #1 (MaeKha sub-district)	04	05	2008-05-20	13	150	5	4.2	N/A	9.2	4.6	TRUE
301	Thailand	9-Fang #1 (MaeKha sub-district)	07	20	2008-05-26	13	120	4.88	4.4	N/A	9.28	4.64	TRUE
302	Thailand	8-Chairprakarn #2 (Maethalope sub-district)	05	05	2008-06-26	13	120	4.77	4	N/A	8.77	4.39	TRUE
303	Thailand	8-Chairprakarn #2 (Maethalope sub-district)	03	06	2008-06-30	13	120	4.88	4	N/A	8.88	4.44	TRUE
304	Thailand	8-Chairprakarn #2 (Maethalope sub-district)	06	02	2008-07-05	13	120	4.77	4.4	N/A	9.17	4.59	TRUE
305	Thailand	2-Maetang #2 (Banchang&Guidchang&In-hta-kin)	16	08	2008-07-14	13	120	4.77	4.2	N/A	8.97	4.49	TRUE
306	Thailand	4-Chiangdao #2(Pingkong subdistric)	12	20	2008-09-08	04	60	4.77	5	N/A	9.77	4.89	TRUE
307	Thailand	4-Chiangdao #2(Pingkong subdistric)	13	21	2008-09-10	08	60	4.77	4.8	N/A	9.57	4.79	TRUE
308	Thailand	4-Chiangdao #2(Pingkong subdistric)	13	05	2008-09-10	08	60	4.77	4.8	N/A	9.57	4.79	TRUE
309	Thailand	4-Chiangdao #2(Pingkong subdistric)	08	06	2008-09-11	08	45	4.88	5	N/A	9.88	4.94	TRUE
310	Thailand	6-Praow #2 (Sunsai&Banpong sub-district)	18	04	2008-10-06	08	60	4.88	4.8	N/A	9.68	4.84	TRUE
311	Thailand	6-Praow #2 (Sunsai&Banpong sub-district)	18	05	2008-10-06	08	60	4.88	4.8	N/A	9.68	4.84	TRUE
312	Thailand	6-Praow #2 (Sunsai&Banpong sub-district)	16	11	2008-10-07	08	60	4.77	4.8	N/A	9.57	4.79	TRUE
313	Thailand	6-Praow #2 (Sunsai&Banpong sub-district)	19	06	2008-10-08	08	60	5	4.8	N/A	9.8	4.9	TRUE
314	Thailand	6-Praow #2 (Sunsai&Banpong sub-district)	10	05	2008-10-14	08	60	4.88	4	N/A	8.88	4.44	TRUE
315	Thailand	6-Praow #2 (Sunsai&Banpong sub-district)	01	02	2008-10-21	08	60	4.77	4.4	N/A	9.17	4.59	TRUE
316	Thailand	12-Fang #4 (Monpin sub-district)	09	10	2008-11-03	13	90	4.88	4.8	N/A	9.68	4.84	TRUE
317	Thailand	12-Fang #4 (Monpin sub-district)	06	11	2008-11-10	13	90	4.56	4.4	N/A	8.96	4.48	TRUE
318	Thailand	12-Fang #4 (Monpin sub-district)	11	21	2008-11-17	13	90	4.56	3.8	N/A	8.36	4.18	TRUE
319	Thailand	12-Fang #4 (Monpin sub-district)	12	04	2008-11-24	13	90	4.44	4.4	N/A	8.84	4.42	TRUE
							AVG	4.84947	4.3614		9.21088	4.60684

## Sheet: Thai VCT Y-1
Entry Order	Site	Community Name	Venue	Counselor ID	Date of Evaluation	Evaluator	Session Length	Pre Test or Post Test	Individual or Couple	A - Basic Skills	B - Introduction	C - Risk Assessment	D - Reducing Risk	E - Test Preparation	F - Giving Result	G - Risk Reduction	H - RR Plan	I - Disclosure	J - Support	GRAND TOTAL	GRAND AVERAGE	Narrative Comments
4	Thailand	2-Maetang #2 (Banchang&Guidchang&In-hta-kin)	06	04	2006-01-12	01	70	both	Individual	4.6	4.9	4.8	4.3	4.6	3.6	4.2	4.5	n/a	4.5	40	4.44	FALSE
6	Thailand	2-Maetang #2 (Banchang&Guidchang&In-hta-kin)	06	09	2006-01-12	01	47	both	Individual	3.7	3.9	4	4	3.8	4	4.4	3.3	3.5	4	38.6	3.86	FALSE
7	Thailand	2-Maetang #2 (Banchang&Guidchang&In-hta-kin)	02	10	2006-01-12	02	45	both	Individual	4.8	4.6	4.5	4	4.8	4	4.4	n/a	4.8	5	40.9	4.54	TRUE
8	Thailand	2-Maetang #2 (Banchang&Guidchang&In-hta-kin)	01	12	2006-01-12	03	60	both	Individual	4.3	3.7	4	3.8	3.8	4	4	4	4.3	3.5	39.4	3.94	FALSE
9	Thailand	2-Maetang #2 (Banchang&Guidchang&In-hta-kin)	01	08	2006-01-12	03	45	both	Individual	4	4	3.8	3.5	3.9	4	3.8	3.5	4	3.7	38.2	3.82	FALSE
10	Thailand	2-Maetang #2 (Banchang&Guidchang&In-hta-kin)	02	10	2006-01-12	15	50	both	Individual	4.8	4.6	4.8	4.5	4.3	4.7	4.6	4.8	n/a	5	42.1	4.68	TRUE
11	Thailand	2-Maetang #2 (Banchang&Guidchang&In-hta-kin)	02	02	2006-01-12	15	70	both	Individual	4.8	4.9	4.8	4.8	4.8	4.8	4.9	5	4.8	5	48.6	4.86	TRUE
3	Thailand	2-Maetang #2 (Banchang&Guidchang&In-hta-kin)	06	09	2006-01-12	04	45	both	Individual	4.3	4.6	4.1	4	4.6	4.6	4	3.8	4	5	43	4.3	FALSE
14	Thailand	2-Maetang #2 (Banchang&Guidchang&In-hta-kin)	02	10	2006-01-13	02	48	both	Individual	4.8	5	4.7	4.1	4.8	4.7	4.3	n/a	4.3	5	41.7	4.63	FALSE
15	Thailand	2-Maetang #2 (Banchang&Guidchang&In-hta-kin)	01	03	2006-01-13	14	40	both	Individual	4.8	4.1	3.6	3.6	3.7	4.2	3.6	3	3.8	5	39.4	3.94	TRUE
13	Thailand	2-Maetang #2 (Banchang&Guidchang&In-hta-kin)	02	02	2006-01-13	01	98	both	Individual	4.2	5	4.3	4.2	4.4	4.1	4.1	4.5	3.4	5	43.2	4.32	FALSE
12	Thailand	2-Maetang #2 (Banchang&Guidchang&In-hta-kin)	06	09	2006-01-13	04	40	both	Individual	4.6	4	4.1	3.7	4.6	4.4	3.8	4	4.5	5	42.7	4.27	FALSE
16	Thailand	2-Maetang #2 (Banchang&Guidchang&In-hta-kin)	01	08	2006-01-13	14	37	both	Individual	4.3	4	3.1	3	3.8	4.3	3.1	3	n/a	4	32.6	3.62	TRUE
17	Thailand	2-Maetang #2 (Banchang&Guidchang&In-hta-kin)	07	09	2006-01-14	04	35	both	Individual	4.5	4.3	3.9	3.8	4.5	4.1	3.9	3.8	4	5	41.8	4.18	FALSE
18	Thailand	2-Maetang #2 (Banchang&Guidchang&In-hta-kin)	02	03	2006-01-14	03	42	both	Individual	4.2	3.3	3.3	3	3.2	3.3	3	3	4	4.5	34.8	3.48	TRUE
19	Thailand	2-Maetang #2 (Banchang&Guidchang&In-hta-kin)	05	10	2006-01-14	02	63	both	Individual	4.7	4.9	4.5	4.7	4.8	4	4	4.5	4.7	5	45.8	4.58	TRUE
20	Thailand	2-Maetang #2 (Banchang&Guidchang&In-hta-kin)	03	03	2006-01-14	01	49	both	Individual	4.9	4.9	4.8	4.6	5	4.8	4.6	4.5	4.5	5	47.6	4.76	TRUE
21	Thailand	2-Maetang #2 (Banchang&Guidchang&In-hta-kin)	03	12	2006-01-15	01	56	both	Individual	4.5	4.3	4.2	4	4.3	3.2	3.6	3.8	3.5	5	40.4	4.04	FALSE
22	Thailand	2-Maetang #2 (Banchang&Guidchang&In-hta-kin)	07	09	2006-01-15	04	40	both	Individual	4.3	4.3	4.1	3.8	4.6	4	4	4	4	4.5	41.6	4.16	FALSE
23	Thailand	2-Maetang #2 (Banchang&Guidchang&In-hta-kin)	03	12	2006-01-15	03	35	both	Individual	4.2	4.1	3.9	3.1	3.7	4.5	4.1	4	4.5	4	40.1	4.01	TRUE
26	Thailand	2-Maetang #2 (Banchang&Guidchang&In-hta-kin)	10	05	2006-01-19	01	79	both	Individual	3.7	4	3	3.1	3.3	3.7	3.4	3	3.3	4	34.5	3.45	TRUE
24	Thailand	2-Maetang #2 (Banchang&Guidchang&In-hta-kin)	08	02	2006-01-19	14	35	both	Individual	4.2	3.9	3.5	3.8	4.3	4	4	4	5	4	40.7	4.07	TRUE
25	Thailand	2-Maetang #2 (Banchang&Guidchang&In-hta-kin)	10	04	2006-01-19	01	60	both	Individual	5	4.9	4.8	4.9	4.9	4.8	4.3	4	4.5	4.5	46.6	4.66	FALSE
28	Thailand	2-Maetang #2 (Banchang&Guidchang&In-hta-kin)	09	13	2006-01-20	03	40	both	Individual	4.5	4.3	4.4	4	4.3	4.3	4	4.3	4.3	4	42.4	4.24	TRUE
27	Thailand	2-Maetang #2 (Banchang&Guidchang&In-hta-kin)	10	05	2006-01-20	04	50	both	Individual	3.8	3.6	3.7	3.7	3.9	4.2	3.6	3.8	4	4	38.3	3.83	FALSE
29	Thailand	2-Maetang #2 (Banchang&Guidchang&In-hta-kin)	11	08	2006-01-21	02	30	both	Individual	4.1	4.1	4.4	3.8	4.6	4.3	4.1	n/a	4.1	4	37.5	4.17	FALSE
30	Thailand	2-Maetang #2 (Banchang&Guidchang&In-hta-kin)	11	13	2006-01-22	02	35	both	Individual	4.4	4.3	4.1	4.1	4.3	4.3	4.2	4	4.8	4	42.5	4.25	TRUE
31	Thailand	2-Maetang #2 (Banchang&Guidchang&In-hta-kin)	04	03	2006-01-22	01	70	both	Individual	4.7	5	5	4.9	4.8	4.8	5	4.3	4	5	47.5	4.75	FALSE
32	Thailand	4-Chiangdao#2 (Pingkong sub-district)	14	09	2006-01-26	15	44	both	Individual	4.7	4.7	4.8	4.3	4.7	4.8	4.2	n/a	4.6	5	41.8	4.64	FALSE
33	Thailand	4-Chiangdao#2 (Pingkong sub-district)	14	03	2006-01-26	15	43	both	Individual	4.7	4.7	4.8	4.9	4.6	4.7	n/a	n/a	4.2	5	37.6	4.7	TRUE
34	Thailand	4-Chiangdao#2 (Pingkong sub-district)	17	08	2006-01-26	01	45	both	Individual	4.3	4.1	4.9	3.7	4.3	4.5	3.8	3.5	4	4.5	41.6	4.16	FALSE
35	Thailand	4-Chiangdao#2 (Pingkong sub-district)	17	10	2006-01-26	01	55	both	Individual	4.2	4.1	3.9	3.2	4	3.8	4	3.8	3.6	5	39.6	3.96	FALSE
36	Thailand	4-Chiangdao#2 (Pingkong sub-district)	17	04	2006-01-26	01	60	both	Individual	5	4.9	4.5	4.8	4.8	4.7	4.3	4.5	4.7	5	47.2	4.72	FALSE
38	Thailand	4-Chiangdao#2 (Pingkong sub-district)	14	09	2006-01-27	03	32	both	Individual	4.5	4.3	3.6	3	3.5	4.7	4.3	4.5	4.7	4	41.1	4.11	TRUE
39	Thailand	4-Chiangdao#2 (Pingkong sub-district)	13	12	2006-01-27	01	45	both	Individual	4.9	4.1	5	4.8	4.5	3.1	4.7	3.8	n/a	4.5	39.4	4.38	FALSE
37	Thailand	4-Chiangdao#2 (Pingkong sub-district)	13	12	2006-01-27	02	65	both	Individual	4.4	4	4.4	3.8	4.7	4	3.8	4	4	3.7	40.8	4.08	TRUE
40	Thailand	4-Chiangdao#2 (Pingkong sub-district)	13	17	2006-01-27	01	60	both	Individual	5	4.7	4.3	4	4.8	5	5	4.5	n/a	4	41.3	4.59	FALSE
41	Thailand	4-Chiangdao#2 (Pingkong sub-district)	16	03	2006-01-28	01	65	both	Individual	5	4.9	5	3.6	5	4.7	n/a	n/a	4.8	5	38	4.75	FALSE
42	Thailand	4-Chiangdao#2 (Pingkong sub-district)	16	09	2006-01-28	01	95	both	Individual	3.8	4.4	3.2	3.1	3.9	3.7	3.6	3	3	3.2	34.9	3.49	FALSE
43	Thailand	4-Chiangdao#2 (Pingkong sub-district)	18	10	2006-01-28	04	40	both	Individual	4.3	4	4	4	4.5	4.4	4.1	3.7	4	4.5	41.5	4.15	FALSE
44	Thailand	4-Chiangdao#2 (Pingkong sub-district)	15	12	2006-01-29	02	50	both	Individual	4.2	4.3	4.1	4	4.5	4.3	4.3	4	4.3	3.7	41.7	4.17	TRUE
51	Thailand	4-Chiangdao#2 (Pingkong sub-district)	13	05	2006-02-02	02	55	both	Individual	4.6	4.7	4.1	3.4	4.4	4.7	3.8	4	4.5	5	43.2	4.32	TRUE
46	Thailand	4-Chiangdao#2 (Pingkong sub-district)	20	11	2006-02-02	03	46	both	Individual	4.5	4	4.8	4.2	4	4	4.3	4	4.5	4	42.3	4.23	FALSE
47	Thailand	4-Chiangdao#2 (Pingkong sub-district)	21	04	2006-02-02	15	38	both	Individual	4.8	4.6	4.7	4.9	4.9	4.5	4.6	4.5	4.6	4	46.1	4.61	TRUE
48	Thailand	4-Chiangdao#2 (Pingkong sub-district)	21	13	2006-02-02	15	43	both	Individual	4.6	4.6	4.8	4.2	4.4	4.5	4.2	4.3	4.7	4.5	44.8	4.48	TRUE
49	Thailand	4-Chiangdao#2 (Pingkong sub-district)	13	05	2006-02-02	01	100	both	Individual	3.5	4.1	3.6	1.4	3	3.7	1.8	1.3	n/a	3.5	25.9	2.88	TRUE
50	Thailand	4-Chiangdao#2 (Pingkong sub-district)	13	02	2006-02-02	01	70	both	Individual	5	4.9	4.9	3.9	4.6	4.8	4.2	3	4.8	5	45.1	4.51	TRUE
57	Thailand	4-Chiangdao#2 (Pingkong sub-district)	20	03	2006-02-03	01	65	both	Individual	5	5	5	5	4.8	4.8	4.8	4.8	4.8	5	49	4.9	TRUE
56	Thailand	6-Praow #2 (Sunsai&Banpong sub-district)	21	13	2006-02-03	04	45	both	Individual	4.5	4.6	4.6	4.4	4.8	4.8	4.1	4.3	4.3	4.5	44.9	4.49	TRUE
58	Thailand	6-Praow #2 (Sunsai&Banpong sub-district)	22	08	2006-02-04	03	40	both	Individual	4.3	4	3.3	3	3.3	4	4	4	4.3	4	38.2	3.82	FALSE
59	Thailand	6-Praow #2 (Sunsai&Banpong sub-district)	23	05	2006-02-04	02	50	both	Individual	4.3	4.9	4.3	3	4.3	4.3	3.8	4	4	4	40.9	4.09	TRUE
60	Thailand	6-Praow #2 (Sunsai&Banpong sub-district)	23	05	2006-02-05	02	55	both	Individual	4.6	5	4.6	3.8	4.5	4.8	4.2	4	4.3	5	44.8	4.48	TRUE
61	Thailand	6-Praow #2 (Sunsai&Banpong sub-district)	22	11	2006-02-05	03	35	both	Individual	4.7	4.3	4.6	4.2	4.7	4.3	4.3	4.3	4.5	4.5	44.4	4.44	TRUE
62	Thailand	6-Praow #2 (Sunsai&Banpong sub-district)	27	09	2006-02-09	02	40	both	Individual	4.3	4.6	4.3	3.4	4.3	4.3	4.1	4.3	4.8	4	42.4	4.24	TRUE
63	Thailand	6-Praow #2 (Sunsai&Banpong sub-district)	25	10	2006-02-09	03	45	both	Individual	4.6	3.7	4.1	3.4	3.7	4.5	4.8	4.8	n/a	4.5	38.1	4.23	TRUE
64	Thailand	6-Praow #2 (Sunsai&Banpong sub-district)	26	12	2006-02-09	01	85	both	Individual	4.4	4.7	4.9	4.2	4.6	5	3.9	4.3	4.2	5	45.2	4.52	TRUE
66	Thailand	6-Praow #2 (Sunsai&Banpong sub-district)	27	08	2006-02-10	15	60	both	Individual	4.6	4.6	4.7	4.7	4.7	4.7	4.7	4	4.3	4.5	45.5	4.55	FALSE
69	Thailand	6-Praow #2 (Sunsai&Banpong sub-district)	25	10	2006-02-10	01	73	both	Individual	4.9	4.6	4.6	4.4	4.5	4.3	4.4	4.3	4.8	5	45.8	4.58	TRUE
67	Thailand	6-Praow #2 (Sunsai&Banpong sub-district)	27	09	2006-02-10	15	40	both	Individual	4.6	4.6	4.4	4.3	4.6	4.5	4.3	n/a	4.7	4.3	40.3	4.48	TRUE
65	Thailand	6-Praow #2 (Sunsai&Banpong sub-district)	26	12	2006-02-10	04	60	both	Individual	4.7	4.4	4.4	4.1	4.8	4.4	4.1	4.3	4.5	5	44.7	4.47	FALSE
68	Thailand	6-Praow #2 (Sunsai&Banpong sub-district)	26	12	2006-02-10	14	76	both	Individual	4.7	3.7	4.3	3.8	4.1	4.3	3.2	4	3.7	3.8	39.6	3.96	TRUE
70	Thailand	6-Praow #2 (Sunsai&Banpong sub-district)	28	10	2006-02-11	03	70	both	Individual	4.6	4.3	4.3	4.3	4.3	5	4.4	4.8	n/a	4.5	40.5	4.5	TRUE
71	Thailand	6-Praow #2 (Sunsai&Banpong sub-district)	30	12	2006-02-11	04	65	both	Individual	4.6	4.6	4.5	4.2	4.7	4.3	4.1	4	3.7	5	43.7	4.37	TRUE
72	Thailand	6-Praow #2 (Sunsai&Banpong sub-district)	29	09	2006-02-11	01	30	both	Individual	4.8	4.6	3.9	3	3.8	3.5	3	3	3.2	3.5	36.3	3.63	TRUE
75	Thailand	6-Praow #2 (Sunsai&Banpong sub-district)	29	08	2006-02-11	01	35	both	Individual	3.5	3.7	3.1	1	3.2	3.8	n/a	n/a	3.2	3	24.5	3.06	TRUE
76	Thailand	6-Praow #2 (Sunsai&Banpong sub-district)	29	08	2006-02-12	02	33	both	Individual	4.5	4.4.	4.1	3.8	4.2	4.2	4	4	4.5	4	41.7	4.17	TRUE
77	Thailand	6-Praow #2 (Sunsai&Banpong sub-district)	28	10	2006-02-12	03	55	both	Individual	4.7	4.3	4.6	4	4.1	5	4.5	5	4.7	4.5	45.4	4.54	FALSE
78	Thailand	6-Praow #2 (Sunsai&Banpong sub-district)	30	12	2006-02-12	04	60	both	Individual	4.5	4.3	4.2	4.1	4.8	4.4	3.8	4.3	4.7	5	44.1	4.41	TRUE
81	Thailand	8-Chaiprakarn #2 (Maethalope sub-district)	37	13	2006-02-16	01	45	both	Individual	4.5	4.3	4	4.8	4.6	4.7	4.9	5	4.8	4.5	46.1	4.61	TRUE
79	Thailand	8-Chaiprakarn #2 (Maethalope sub-district)	35	11	2006-02-16	02	67	both	Individual	4.6	4.1	4.2	4	4.8	4.3	4.3	4.3	4.5	4	43.1	4.31	TRUE
82	Thailand	8-Chaiprakarn #2 (Maethalope sub-district)	35	11	2006-02-17	01	91	both	Individual	4.6	4.6	4	4.7	4.5	4.3	4.6	2.5	n/a	4.3	38.1	4.23	TRUE
80	Thailand	8-Chaiprakarn #2 (Maethalope sub-district)	31	09	2006-02-17	03	40	both	Individual	4.8	4.7	4.6	3.9	4.6	4.5	4.7	4.3	4.3	4.5	44.9	4.49	TRUE
83	Thailand	8-Chaiprakarn #2 (Maethalope sub-district)	33	09	2006-02-18	01	47	both	Individual	4.8	4.9	4.3	4.1	4.8	4.8	4.6	3.5	5	5	45.8	4.58	TRUE
84	Thailand	8-Chaiprakarn #2 (Maethalope sub-district)	33	05	2006-02-18	01	50	both	Individual	3.8	4.3	3.5	2.8	4.3	4.2	3.4	2.5	n/a	3.3	32.1	3.57	TRUE
85	Thailand	8-Chaiprakarn #2 (Maethalope sub-district)	34	12	2006-02-18	02	66	both	Individual	4.6	4.6	4.4	4.1	4.8	4.7	4.6	4	3.7	4.5	44	4.4	TRUE
86	Thailand	8-Chaiprakarn #2 (Maethalope sub-district)	38	10	2006-02-18	04	45	both	Individual	4.5	4.6	4.6	3.9	4.5	4.7	4.3	4	4.5	4.7	44.3	4.43	TRUE
87	Thailand	8-Chaiprakarn #2 (Maethalope sub-district)	34	13	2006-02-19	13	47	both	Individual	4.8	4.7	4.7	4.2	4.8	4.7	4.4	4.3	4.5	4.5	45.6	4.56	TRUE
88	Thailand	8-Chaiprakarn #2 (Maethalope sub-district)	33	05	2006-02-19	03	50	both	Individual	4.2	4.4	3.7	3.3	3.5	4.2	3	3	3.8	3	36.1	3.61	TRUE
92	Thailand	8-Chaiprakarn #2 (Maethalope sub-district)	32	02	2006-02-23	01	65	both	Individual	4.9	4.6	4.5	4.8	4.5	5	5	5	5	5	48.3	4.83	TRUE
89	Thailand	9-Fang #1(MaeKha sub-district)	39	11	2006-02-23	04	43	both	Individual	4.3	4.1	4.2	3.9	4.8	4.4	4.1	4.3	4.5	5	43.6	4.36	TRUE
90	Thailand	8-Chaiprakarn #2 (Maethalope sub-district)	36	08	2006-02-23	03	85	both	Individual	4.3	4.1	4.6	3.8	4.8	4.5	3.8	3.5	4.5	3.5	41.4	4.14	TRUE
91	Thailand	8-Chaiprakarn #2 (Maethalope sub-district)	32	05	2006-02-23	01	60	both	Individual	4.2	4.3	3.3	1.7	3.3	4.2	3.1	1.5	4	2.5	32.1	3.21	TRUE
93	Thailand	8-Chaiprakarn #2 (Maethalope sub-district)	36	08	2006-02-24	03	95	both	Individual	4.3	4.3	4.3	3.3	4.2	4.7	3.4	3	4	4.5	40	4	TRUE
94	Thailand	8-Chaiprakarn #2 (Maethalope sub-district)	32	05	2006-02-24	02	65	both	Individual	4.5	4.3	4.1	3.8	4.2	4.5	3.8	3.8	4.3	4.5	41.8	4.18	TRUE
95	Thailand	9-Fang #1(MaeKha sub-district)	42	11	2006-02-25	04	45	both	Individual	4.4	4.7	4.8	4.8	4.9	4.7	4.4	4.3	4	5	46	4.6	TRUE
99	Thailand	9-Fang #1(MaeKha sub-district)	39	08	2006-02-26	01	50	both	Individual	3.4	4	3	2.7	4.1	4.2	3.3	1.5	4.3	3.3	33.8	3.38	TRUE
96	Thailand	9-Fang #1(MaeKha sub-district)	40	13	2006-02-26	14	62	both	Individual	4	3.9	3.4	4	3.6	4	4	3.8	4.3	3.5	38.5	3.85	TRUE
97	Thailand	9-Fang #1(MaeKha sub-district)	40	05	2006-02-26	14	85	both	Individual	4.5	4.1	3.8	3.4	3.7	3.3	3.9	3.3	n/a	4	34	3.78	TRUE
98	Thailand	9-Fang #1(MaeKha sub-district)	42	11	2006-02-26	15	83	both	Individual	4.3	4.7	4.3	4.3	4.6	4.6	4.2	4	4	4.4	43.4	4.34	TRUE
110	Thailand	9-Fang #1(MaeKha sub-district)	45	10	2006-03-03	01	86	both	Individual	4.9	4.6	4.4	4.8	4.6	4.7	4	4.5	4	5	45.5	4.55	TRUE
109	Thailand	9-Fang #1(MaeKha sub-district)	49	12	2006-03-03	04	125	both	Individual	4.4	4.4	4	3.8	4.5	4.4	4.2	4.3	4.5	4.5	43	4.3	TRUE
102	Thailand	9-Fang #1(MaeKha sub-district)	46	08	2006-03-03	02	63	both	Individual	4.5	4.6	4	3.3	4.4	4.5	4.1	4.3	4	4.5	42.2	4.22	TRUE
111	Thailand	9-Fang #1(MaeKha sub-district)	47	10	2006-03-04	03	86	both	Individual	4.7	4.3	3.9	4	4.7	5	4.2	5	n/a	4.5	40.3	4.48	TRUE
113	Thailand	9-Fang #1(MaeKha sub-district)	43	08	2006-03-04	01	85	both	Individual	3.3	3.4	3.6	2.2	3.7	4	3.1	2.5	3.7	5	34.5	3.45	TRUE
117	Thailand	9-Fang #1(MaeKha sub-district)	44	04	2006-03-05	01	64	both	Individual	5	4.9	5	4.9	4.9	5	5	5	4.8	4.5	49	4.9	TRUE
114	Thailand	9-Fang #1(MaeKha sub-district)	44	09	2006-03-05	01	55	both	Individual	3.8	4.4	3.8	3	4.2	4.7	n/a	n/a	4	4.5	32.4	4.05	TRUE
116	Thailand	9-Fang #1(MaeKha sub-district)	47	10	2006-03-05	03	86	both	Individual	4.8	4.6	4.4	4.1	4.3	4.8	4.6	4.5	4.8	4.5	45.4	4.54	TRUE
115	Thailand	9-Fang #1(MaeKha sub-district)	43	12	2006-03-05	02	105	both	Individual	4.8	4.4	4.4	4	4.4	4.5	4	4.5	4.2	4	43.2	4.32	TRUE
120	Thailand	12-Fang #4 (Monpin sub-district)	51	08	2006-03-09	04	50	both	Individual	4.2	4.3	4.2	3.9	4.8	4.4	4	4	4.4	5	43.2	4.32	TRUE
118	Thailand	9-Fang #1(MaeKha sub-district)	48	03	2006-03-09	01	60	both	Individual	5	4.9	5	5	4	5	5	5	5	5	49.9	4.99	TRUE
119	Thailand	9-Fang #1(MaeKha sub-district)	48	05	2006-03-09	01	60	both	Individual	4.2	3.7	4	4	4.1	2.8	3.6	4.5	3.7	4	38.6	3.86	TRUE
121	Thailand	9-Fang #1(MaeKha sub-district)	50	13	2006-03-10	01	93	both	Individual	4.9	4.9	5	4.3	4.4	4.7	4.7	4	4	5	45.9	4.59	TRUE
123	Thailand	12-Fang #4 (Monpin sub-district)	51	11	2006-03-10	04	70	both	Individual	4.5	4.7	4.6	4.3	4.8	4.6	4.4	4.3	4.5	4.5	45.2	4.52	TRUE
122	Thailand	12-Fang #4 (Monpin sub-district)	48	05	2006-03-10	03	45	both	Individual	4.6	3.9	4.7	3.6	4.6	4.3	4	3	4.5	4.5	41.7	4.17	TRUE
126	Thailand	12-Fang #4 (Monpin sub-district)	56	08	2006-03-11	01	82	both	Individual	3.4	3.6	3.1	2.1	3.1	3.3	2.8	2.8	3.4	4	31.6	3.16	TRUE
125	Thailand	12-Fang #4 (Monpin sub-district)	56	11	2006-03-11	01	79	both	Individual	4.8	4.7	4.8	4.6	4.2	4.2	4.4	5	n/a	4.5	41.2	4.58	TRUE
124	Thailand	12-Fang #4 (Monpin sub-district)	54	13	2006-03-11	02	75	both	Individual	4.7	4.6	4.7	4.2	4.8	4.7	4.6	4.8	4.7	5	46.8	4.68	TRUE
127	Thailand	12-Fang #4 (Monpin sub-district)	56	08	2006-03-12	04	55	both	Individual	4.5	4.6	4.3	4.2	4.7	4.4	4.2	4	4.7	4.5	44.1	4.41	TRUE
129	Thailand	12-Fang #4 (Monpin sub-district)	55	09	2006-03-16	01	56	both	Individual	4.8	4.6	4.6	4.6	4.8	4.3	4.8	5	4.8	5	47.3	4.73	TRUE
130	Thailand	12-Fang #4 (Monpin sub-district)	53	13	2006-03-16	04	55	both	Individual	4.7	4.7	4.7	4.7	4.8	4.3	4.4	4.5	4.8	5	46.6	4.66	TRUE
131	Thailand	12-Fang #4 (Monpin sub-district)	60	12	2006-03-16	03	85	both	Individual	4.7	3.7	5	5	4.7	5	4.8	3.5	1	4.5	41.9	4.19	TRUE
128	Thailand	12-Fang #4 (Monpin sub-district)	55	10	2006-03-16	01	73	both	Individual	4.7	4.3	3.6	4	4.6	5	4.7	4.8	n/a	4.5	40.2	4.47	TRUE
132	Thailand	12-Fang #4 (Monpin sub-district)	53	05	2006-03-17	01	75	both	Individual	4.5	3.9	3.8	3.7	4.4	3.7	4	4.3	4.3	5	41.6	4.16	TRUE
133	Thailand	12-Fang #4 (Monpin sub-district)	53	13	2006-03-17	01	50	both	Individual	4.8	4.7	4.8	4.9	4.9	4.7	4.9	5	5	5	48.7	4.87	TRUE
135	Thailand	12-Fang #4 (Monpin sub-district)	61	05	2006-03-18	15	50	both	Individual	4.2	4.3	3.9	4.3	4.1	4.2	4.1	4	4.2	4	41.3	4.13	TRUE
134	Thailand	12-Fang #4 (Monpin sub-district)	59	12	2006-03-18	01	99	both	Individual	4.1	4	4	3.3	4.1	3.8	3.9	3.5	2.6	5	38.3	3.83	TRUE
136	Thailand	12-Fang #4 (Monpin sub-district)	61	13	2006-03-18	15	71	both	Individual	4.5	4.6	4.4	4.2	4.4	4.8	4.1	4.3	4.2	4.2	43.7	4.37	TRUE
137	Thailand	12-Fang #4 (Monpin sub-district)	58	10	2006-03-18	14	66	both	Individual	4.7	4.6	3.6	3.6	3.7	4.7	4.4	4.5	n/a	4	37.8	4.2	TRUE
139	Thailand	12-Fang #4 (Monpin sub-district)	59	08	2006-03-18	01	74	both	Individual	3.9	4	3.8	3.6	3.3	3.8	4	4	4.2	45	39.1	3.91	TRUE
138	Thailand	12-Fang #4 (Monpin sub-district)	58	09	2006-03-18	14	57	both	Individual	4.6	4.6	4	3.4	4.6	4.5	3.8	4	4	3.5	41	4.1	TRUE
140	Thailand	12-Fang #4 (Monpin sub-district)	58	11	2006-03-19	01	59	both	Individual	4.4	4.3	4.3	3.9	4.5	4.3	3.1	4.5	3.5	4.3	41.1	4.11	TRUE
141	Thailand	12-Fang #4 (Monpin sub-district)	59	08	2006-03-19	08	60	both	Individual	4.1	4.6	4	3.2	4.4	4.5	3.6	3.5	n/a	4	35.9	3.99	TRUE
142	Thailand	12-Fang #4 (Monpin sub-district)	61	05	2006-03-19	04	75	both	Individual	4.5	4.4	4.2	3.9	4.6	4.2	3.9	4	4	4.3	42	4.2	TRUE
143	Thailand	12-Fang #4 (Monpin sub-district)	62	10	2006-03-23	03	70	both	Individual	4.8	4.6	4.2	4.6	4.5	4.7	4.7	4.5	5	5	46.6	4.66	TRUE
144	Thailand	12-Fang #4 (Monpin sub-district)	57	08	2006-03-24	02	55	both	Individual	4.2	4.4	4.4	3.9	4.6	4.7	3.9	3.8	4.8	4.5	43.2	4.32	TRUE
147	Thailand	13-Mae-eye #1 (Thaton sub-district)	63	10	2006-03-25	03	55	both	Individual	4.8	4.9	4.4	3.9	4.5	5	4	1	4.2	4.5	41.2	4.12	TRUE
145	Thailand	13-Mae-eye #1 (Thaton sub-district)	65	02	2006-03-25	01	45	both	Individual	4.9	4.7	4.7	4.9	4.4	4.8	5	5	5	5	48.4	4.84	TRUE
146	Thailand	13-Mae-eye #1 (Thaton sub-district)	66	12	2006-03-25	04	55	both	Individual	4.5	4.4	4.6	4.4	4.8	4.5	4.3	4.3	4.8	4.5	45.1	4.51	TRUE
148	Thailand	13-Mae-eye #1 (Thaton sub-district)	69	03	2006-03-28	01	blank	both	Individual	5	4.9	5	5	4.9	4.8	5	4.5	4.7	5	48.8	4.88	TRUE
149	Thailand	13-Mae-eye #1 (Thaton sub-district)	72	02	2006-03-29	01	50	both	Individual	4.8	4.7	4.6	4.8	4.8	4.8	4.4	4.8	5	5	47.7	4.77	TRUE
151	Thailand	13-Mae-eye #1 (Thaton sub-district)	71	08	2006-03-30	14	83	both	Individual	4.8	4.4	4.7	4.1	4.3	4.2	3.7	4	n/a	4.5	38.7	4.3	TRUE
150	Thailand	13-Mae-eye #1 (Thaton sub-district)	71	11	2006-03-30	14	49	both	Individual	4.7	4.4	4.1	4.4	4.1	4	4	4.3	3.5	4.3	41.8	4.18	TRUE
152	Thailand	13-Mae-eye #1 (Thaton sub-district)	71	04	2006-03-31	01	51	both	Individual	5	5	5	4.9	5	4.8	5	5	4.7	5	49.4	4.94	TRUE
156	Thailand	2-Maetang #2 (Banchang&Guidchang&In-hta-kin)	02	02	2006-05-04	01	45	pre-test	Individual	4.4	4.7	4.7	4.3	4.7	4.8	4.2	5	4.5	5	46.3	4.63	TRUE
158	Thailand	2-Maetang #2 (Banchang&Guidchang&In-hta-kin)	01	10	2006-05-04	15	53	pre-test	Individual	4.8	4.7	4.8	4.6	4.6	4.8	4.6	4.5	N/A	4.2	41.6	4.62	TRUE
157	Thailand	2-Maetang #2 (Banchang&Guidchang&In-hta-kin)	01	04	2006-05-04	15	51	pre-test	Individual	4.8	4.7	4.9	4.7	4.9	5	4.3	4.3	4.8	4.8	47.2	4.72	TRUE
159	Thailand	2-Maetang #2 (Banchang&Guidchang&In-hta-kin)	02	12	2006-05-04	01	55	pre-test	Individual	4.5	4	4.6	3.7	4.3	4.3	3.8	4.5	4.3	3.5	41.5	4.15	TRUE
161	Thailand	2-Maetang #2 (Banchang&Guidchang&In-hta-kin)	02	03	2006-05-05	01	85	pre-test	Individual	4.8	4.9	4.3	4.6	4.5	4.3	4.6	5	4.4	4.8	46.2	4.62	TRUE
160	Thailand	2-Maetang #2 (Banchang&Guidchang&In-hta-kin)	02	08	2006-05-05	01	80	pre-test	Individual	4.5	3.9	4.2	4.1	4.4	4.6	4.6	3.3	3.5	4.3	41.4	4.14	TRUE
162	Thailand	2-Maetang #2 (Banchang&Guidchang&In-hta-kin)	06	08	2006-05-06	03	49	pre-test	Individual	4	3.4	3.7	3.5	3.8	4	3.7	3.5	N/A	5	34.6	3.84	TRUE
165	Thailand	2-Maetang #2 (Banchang&Guidchang&In-hta-kin)	08	10	2006-05-07	01	55	pre-test	Individual	4.4	4.4	4.3	3.7	4.2	4.2	4.2	4	4.2	4.5	42.1	4.21	TRUE
164	Thailand	2-Maetang #2 (Banchang&Guidchang&In-hta-kin)	08	04	2006-05-07	01	70	pre-test	Individual	4.7	4.7	4.8	4.6	4.8	4.7	4.7	4.5	4.4	5	46.9	4.69	TRUE
163	Thailand	2-Maetang #2 (Banchang&Guidchang&In-hta-kin)	11	12	2006-05-07	02	64	pre-test	Individual	4.8	4.7	3.9	4.1	4.8	4.5	4.3	4.8	N/A	5	40.9	4.54	TRUE
166	Thailand	2-Maetang #2 (Banchang&Guidchang&In-hta-kin)	05	03	2006-05-12	14	60	pre-test	Individual	4.8	4.9	3.8	4.3	4.5	4.7	4	4.3	3	4.3	42.6	4.26	TRUE
167	Thailand	2-Maetang #2 (Banchang&Guidchang&In-hta-kin)	05	11	2006-05-12	14	50	pre-test	Individual	4.8	4.7	4.2	4.4	4.7	4.5	4	3.5	3	4.3	42.1	4.21	TRUE
169	Thailand	2-Maetang #2 (Banchang&Guidchang&In-hta-kin)	15	09	2006-05-13	04	45	pre-test	Individual	4.5	4.4	4.6	4.2	4.8	4.4	4.4	4.3	4.7	4	44.3	4.43	TRUE
168	Thailand	2-Maetang #2 (Banchang&Guidchang&In-hta-kin)	07	02	2006-05-13	01	48	pre-test	Individual	4.9	4.7	4.5	4.6	4.6	4.8	4.3	4.8	4.8	4.7	46.7	4.67	TRUE
171	Thailand	2-Maetang #2 (Banchang&Guidchang&In-hta-kin)	07	08	2006-05-13	08	91	pre-test	Individual	4.2	4.1	3.6	3.6	3.6	3.8	3.6	3	3.5	4	37	3.7	TRUE
170	Thailand	2-Maetang #2 (Banchang&Guidchang&In-hta-kin)	08	11	2006-05-13	03	52	pre-test	Individual	4.7	3.7	4.3	4.3	4.3	4.4	4.5	4	4.5	N/A	38.4	4.27	TRUE
172	Thailand	2-Maetang #2 (Banchang&Guidchang&In-hta-kin)	21	08	2006-05-15	02	83	pre-test	Individual	4.7	4.3	4.7	4.1	4.7	4.3	4.3	4.8	5	5	45.9	4.59	TRUE
174	Thailand	2-Maetang #2 (Banchang&Guidchang&In-hta-kin)	09	11	2006-05-18	15	41	pre-test	Individual	4.8	4.9	4.9	4.3	4.8	4.7	4.6	4.5	4.6	4.4	46.5	4.65	TRUE
175	Thailand	2-Maetang #2 (Banchang&Guidchang&In-hta-kin)	09	13	2006-05-18	15	52	pre-test	Individual	4.6	4.6	4.7	4.7	4.7	5	4.7	4.8	4.6	4.4	46.8	4.68	TRUE
173	Thailand	2-Maetang #2 (Banchang&Guidchang&In-hta-kin)	08	10	2006-05-18	03	55	pre-test	Individual	4.5	4.6	4.8	4.2	4.1	N/A	N/A	N/A	N/A	N/A	22.2	4.44	TRUE
176	Thailand	2-Maetang #2 (Banchang&Guidchang&In-hta-kin)	09	09	2006-05-19	01	52	pre-test	Individual	4.6	4.7	4.4	4.2	4.5	4.3	4.3	4.5	4.3	4.5	44.3	4.43	TRUE
177	Thailand	4-Chiangdao#2 (Pingkong sub-district)	07	11	2006-05-20	01	52	pre-test	Individual	4.8	4.7	4.3	4.7	4.7	4.5	4.7	4.5	4.5	5	46.4	4.64	TRUE
178	Thailand	4-Chiangdao#2 (Pingkong sub-district)	11	08	2006-05-20	04	55	pre-test	Individual	4.2	4.6	4.4	4.6	4.8	4.3	3.9	4	4.3	5	44.1	4.41	TRUE
180	Thailand	4-Chiangdao#2 (Pingkong sub-district)	12	13	2006-05-21	02	49	pre-test	Individual	4.9	4.7	4.5	4.6	4.8	4.7	4.4	4.8	4.9	5	47.3	4.73	TRUE
179	Thailand	4-Chiangdao#2 (Pingkong sub-district)	15	12	2006-05-21	01	71	pre-test	Individual	4.2	4.1	3.4	3.3	3.9	4	4.1	N/A	3.2	3.7	33.9	3.77	TRUE
181	Thailand	4-Chiangdao#2 (Pingkong sub-district)	14	10	2006-05-26	14	67	pre-test	Individual	4.7	4.7	4.1	4	4.5	4.7	4.4	4	4.7	4	43.8	4.38	TRUE
182	Thailand	4-Chiangdao#2 (Pingkong sub-district)	14	02	2006-05-26	14	77	pre-test	Individual	4.7	4.6	4.8	4.6	4.5	4.8	4.4	4	4.5	4.3	45.2	4.52	TRUE
183	Thailand	4-Chiangdao#2 (Pingkong sub-district)	14	08	2006-05-27	03	45	pre-test	Individual	4.7	4.9	4.3	3.9	4.9	4.2	3.7	3.5	4.5	5	43.6	4.36	TRUE
185	Thailand	4-Chiangdao#2 (Pingkong sub-district)	18	10	2006-05-28	02	59	pre-test	Individual	4.5	4.1	4.3	4	4.8	4.5	4.3	4.8	4.8	5	45.1	4.51	TRUE
184	Thailand	4-Chiangdao#2 (Pingkong sub-district)	18	13	2006-05-28	04	40	pre-test	Individual	4.6	4.9	4.8	4.7	4.8	4.8	4.3	5	4.8	4.5	47.2	4.72	TRUE
186	Thailand	4-Chiangdao#2 (Pingkong sub-district)	18	12	2006-06-01	01	80	both	Individual	4.3	4.3	4.2	4.3	4.3	4.7	4.7	4	4.8	4.5	44.1	4.41	TRUE
187	Thailand	4-Chiangdao#2 (Pingkong sub-district)	18	04	2006-06-01	01	80	both	Individual	4.3	4.7	4.3	4.3	4.5	4.5	4.1	4.5	4.7	5	44.9	4.49	TRUE
191	Thailand	6-Praow #2 (Sunsai&Banpong sub-district)	27	03	2006-06-03	15	55	both	Individual	4.8	5	4.8	4.7	4.7	5	4.6	5	4.7	4.7	47.7	4.77	TRUE
189	Thailand	6-Praow #2 (Sunsai&Banpong sub-district)	26	12	2006-06-03	14	74	both	Individual	4.2	4.6	3.8	3.9	4.3	4.3	4.2	4.5	4.4	4.3	42.5	4.25	TRUE
190	Thailand	6-Praow #2 (Sunsai&Banpong sub-district)	21	09	2006-06-03	01	67	both	Individual	4.8	5	4.4	4.2	4.6	4.3	4.4	4	4.7	5	45.4	4.54	TRUE
188	Thailand	6-Praow #2 (Sunsai&Banpong sub-district)	26	04	2006-06-03	14	43	both	Individual	4.8	4.3	4.4	4.6	4.8	4.8	4.4	4	4.5	5	45.6	4.56	TRUE
192	Thailand	6-Praow #2 (Sunsai&Banpong sub-district)	21	09	2006-06-04	02	47	both	Individual	4.7	4.4	4.4	4.3	4.8	4.5	4.6	4.8	4.5	5	46	4.6	TRUE
193	Thailand	6-Praow #2 (Sunsai&Banpong sub-district)	27	13	2006-06-04	01	48	both	Individual	4.8	4.9	4.9	4.8	4.6	4.8	4.9	4.8	4.8	5	48.3	4.83	TRUE
194	Thailand	6-Praow #2 (Sunsai&Banpong sub-district)	26	12	2006-06-04	04	70	both	Individual	4.5	4.4	4.6	4.4	4.7	4.5	3.9	4.3	4.2	5	44.5	4.45	TRUE
196	Thailand	6-Praow #2 (Sunsai&Banpong sub-district)	29	04	2006-06-08	01	68	both	Individual	5	4.9	5	5	4.8	5	4.9	4.8	5	5	49.4	4.94	TRUE
195	Thailand	6-Praow #2 (Sunsai&Banpong sub-district)	29	26	2006-06-08	01	62	both	Individual	4.6	4.4	4.5	4.6	4.3	4.5	3.8	3	4.2	4	41.9	4.19	TRUE
197	Thailand	6-Praow #2 (Sunsai&Banpong sub-district)	29	10	2006-06-08	01	60	both	Individual	4.7	4.6	4.3	4.1	4.5	4.7	4.7	5	4.2	4.5	45.3	4.53	TRUE
199	Thailand	6-Praow #2 (Sunsai&Banpong sub-district)	30	10	2006-06-09	04	60	both	Individual	4.8	4.6	4.9	4.8	4.8	4.8	4.6	5	5	5	48.3	4.83	TRUE
198	Thailand	6-Praow #2 (Sunsai&Banpong sub-district)	30	25	2006-06-09	01	86	both	Individual	4.3	4.1	4.4	3.9	4.2	4.3	4.4	4.5	4.7	4.5	43.3	4.33	TRUE
201	Thailand	6-Praow #2 (Sunsai&Banpong sub-district)	29	25	2006-06-10	02	75	both	Individual	4.6	4	4.8	4	4.4	4.2	4.3	4.3	4.5	4	43.1	4.31	TRUE
200	Thailand	6-Praow #2 (Sunsai&Banpong sub-district)	24	26	2006-06-10	03	60	both	Individual	4.6	4	4.1	4	4	4.3	3.9	3.5	4	4.5	40.9	4.09	TRUE
203	Thailand	6-Praow #2 (Sunsai&Banpong sub-district)	22	09	2006-06-15	01	67	both	Individual	4.3	4.7	4.3	4	4.3	4.3	4.4	4.5	N/A	4.5	39.3	4.37	TRUE
202	Thailand	6-Praow #2 (Sunsai&Banpong sub-district)	22	25	2006-06-15	01	65	both	Individual	4.8	4.7	4.8	4.6	4.8	4.7	4.8	3	5	5	46.2	4.62	TRUE
204	Thailand	6-Praow #2 (Sunsai&Banpong sub-district)	22	10	2006-06-16	02	83	both	Individual	4.8	4.6	4.8	4.2	4.8	4.8	4.6	4.5	4.8	5	46.9	4.69	TRUE
206	Thailand	6-Praow #2 (Sunsai&Banpong sub-district)	24	10	2006-06-17	01	67	both	Individual	4.7	4.9	4.8	4.9	4.5	4.8	4.5	4.3	5	5	47.4	4.74	TRUE
205	Thailand	6-Praow #2 (Sunsai&Banpong sub-district)	22	25	2006-06-17	03	82	both	Individual	4.8	4.7	4.9	4.3	4.7	4.5	4.4	5	4.8	4.5	46.6	4.66	TRUE
207	Thailand	6-Praow #2 (Sunsai&Banpong sub-district)	24	12	2006-06-17	01	67	both	Individual	4.7	4.6	4.3	4.4	4.3	4.5	4.7	4.5	5	5	46	4.6	TRUE
208	Thailand	6-Praow #2 (Sunsai&Banpong sub-district)	22	26	2006-06-17	04	60	both	Individual	4.7	4.7	4.9	4.7	4.7	4.5	4.2	4	4.2	5	45.6	4.56	TRUE
209	Thailand	6-Praow #2 (Sunsai&Banpong sub-district)	22	09	2006-06-18	03	74	both	Individual	4.9	4.7	4.3	4.2	4.7	5	4.4	5	5	4.5	46.7	4.67	TRUE
210	Thailand	6-Praow #2 (Sunsai&Banpong sub-district)	28	12	2006-06-18	02	63	pre-test	Individual	4.5	4.6	4.6	4.3	4.7	N/A	N/A	N/A	N/A	N/A	22.7	4.54	TRUE
211	Thailand	8-Chaiprakarn #2 (Maethalope sub-district)	31	13	2006-06-22	01	52	both	Individual	4.9	5	4.9	5	4.9	4.8	4.8	5	4.8	5	49.1	4.91	TRUE
212	Thailand	8-Chaiprakarn #2 (Maethalope sub-district)	31	03	2006-06-24	01	103	both	Individual	4.9	4.9	5	4.9	4.9	5	5	5	5	5	49.6	4.96	TRUE
214	Thailand	9-Fang #1(MaeKha sub-district)	40	04	2006-06-29	01	62	both	Individual	4.8	4.9	4.4	4.7	4.9	4.8	4.4	5	4.8	5	47.7	4.77	TRUE
213	Thailand	9-Fang #1(MaeKha sub-district)	40	25	2006-06-29	01	73	both	Individual	4.6	4.9	4.9	4.8	4.4	5	4.7	4.5	4.6	5	47.4	4.74	TRUE
215	Thailand	9-Fang #1(MaeKha sub-district)	39	26	2006-06-29	02	74	both	Individual	4.8	4.6	4.4	4.4	4.6	4.6	4	3.8	4.9	4.6	44.7	4.47	TRUE
219	Thailand	9-Fang #1(MaeKha sub-district)	48	26	2006-06-30	15	75	both	Individual	4.8	4.6	4.8	4.7	4.6	4.7	4.4	4.3	4.7	4.3	45.9	4.59	TRUE
216	Thailand	9-Fang #1(MaeKha sub-district)	41	04	2006-06-30	14	50	both	Individual	4.8	5	4.8	4.7	4.8	4.8	4.6	4.8	4.7	4.7	47.7	4.77	TRUE
217	Thailand	9-Fang #1(MaeKha sub-district)	41	25	2006-06-30	14	55	both	Individual	4.8	4.7	4.7	4.6	4.5	4.8	4.7	4.8	4.8	4	46.4	4.64	TRUE
218	Thailand	9-Fang #1(MaeKha sub-district)	48	02	2006-06-30	15	40	both	Individual	4.8	4.9	4.7	4.8	4.8	4.8	4.7	5	4.8	4.6	47.9	4.79	TRUE
221	Thailand	9-Fang #1(MaeKha sub-district)	43	10	2006-07-01	03	105	both	Individual	4.9	4.7	4.8	4.4	4.8	4.5	4.8	5	4.8	5	47.7	4.77	TRUE
220	Thailand	9-Fang #1(MaeKha sub-district)	41	26	2006-07-01	01	60	both	Individual	4.2	4.4	3.9	4	4	4	4.1	3	3.5	4	39.1	3.91	TRUE
222	Thailand	9-Fang #1(MaeKha sub-district)	45	03	2006-07-02	01	98	both	Individual	4.9	5	4.8	4.8	4.9	5	5	5	5	5	49.4	4.94	TRUE
223	Thailand	9-Fang #1(MaeKha sub-district)	43	26	2006-07-06	04	50	both	Individual	4.8	4.6	4.9	4.6	4.8	4.7	4.4	4.8	4.8	4	46.4	4.64	TRUE
224	Thailand	9-Fang #1(MaeKha sub-district)	46	13	2006-07-07	03	50	both	Individual	4.9	5	4.9	4.4	5	4.8	4.7	5	5	4.5	48.2	4.82	TRUE
227	Thailand	9-Fang #1(MaeKha sub-district)	42	12	2006-07-08	15	80	both	Individual	4.8	4.7	4.7	4.6	4.8	4.8	4.6	5	4.8	4.7	47.5	4.75	TRUE
226	Thailand	9-Fang #1(MaeKha sub-district)	42	25	2006-07-08	15	63	both	Individual	4.8	4.6	4.7	4.6	4.7	4.8	4.6	4.8	4.7	4.7	47	4.7	TRUE
225	Thailand	9-Fang #1(MaeKha sub-district)	47	09	2006-07-08	01	83	both	Individual	4.7	4.6	4.4	4.6	4.6	4.5	4.4	4.3	4.3	4.5	44.9	4.49	TRUE
230	Thailand	12-Fang #4 (Monpin sub-district)	52	25	2006-07-09	02	77	both	Individual	4.8	4.9	4.8	4.2	4.9	4.5	4.7	4.8	4.7	5	47.3	4.73	TRUE
229	Thailand	12-Fang #4 (Monpin sub-district)	51	26	2006-07-09	01	62	both	Individual	4.8	4.7	4.7	4.4	4.6	4.7	4.2	5	4	4.5	45.6	4.56	TRUE
228	Thailand	12-Fang #4 (Monpin sub-district)	51	13	2006-07-09	01	51	both	Individual	5	4.9	5	4.9	4.8	4.8	5	5	5	5	49.4	4.94	TRUE
231	Thailand	12-Fang #4 (Monpin sub-district)	52	12	2006-07-09	02	83	both	Individual	4.8	4.6	4.9	4.3	4.9	4.7	4.6	4.8	4.8	4.5	46.9	4.69	TRUE
232	Thailand	12-Fang #4 (Monpin sub-district)	58	12	2006-07-14	04	68	both	Individual	4.9	4.7	5	4.9	5	5	4.9	4.8	4.8	5	49	4.9	TRUE
233	Thailand	12-Fang #4 (Monpin sub-district)	56	03	2006-07-14	01	40	both	Individual	5	5	5	4.9	4.9	4.8	5	N/A	5	5	44.6	4.96	TRUE
234	Thailand	12-Fang #4 (Monpin sub-district)	59	12	2006-07-15	01	82	both	Individual	4.3	4.6	4	4.1	4.6	4.3	4.7	4.3	5	4	43.9	4.39	TRUE
236	Thailand	12-Fang #4 (Monpin sub-district)	55	13	2006-07-16	02	50	both	Individual	4.9	4.9	4.8	4.4	4.8	4.8	4.7	5	5	5	48.3	4.83	TRUE
235	Thailand	12-Fang #4 (Monpin sub-district)	55	02	2006-07-16	01	54	both	Individual	5	4.9	5	4.7	4.9	4.7	5	5	5	5	49.2	4.92	TRUE
237	Thailand	13-Mae-eye #1 (Thaton sub-district)	64	10	2006-07-21	04	30	pre-test	Individual	4.9	5	5	4.6	4.8	N/A	N/A	N/A	N/A	N/A	24.3	4.86	TRUE
238	Thailand	13-Mae-eye #1 (Thaton sub-district)	63	26	2006-07-22	02	55	both	Individual	4.7	4.7	4.4	4.8	4.8	4.8	4.4	4.3	4.5	5	46.4	4.64	TRUE
240	Thailand	13-Mae-eye #1 (Thaton sub-district)	64	25	2006-07-23	03	65	both	Individual	5	4.7	4.8	4.7	4.8	4.8	4.8	4.8	4.7	5	48.1	4.81	TRUE
239	Thailand	13-Mae-eye #1 (Thaton sub-district)	64	09	2006-07-23	02	42	both	Individual	4.8	4.7	4.8	4.6	4.7	4.7	4.7	4.5	4.7	5	47.2	4.72	TRUE
241	Thailand	13-Mae-eye #1 (Thaton sub-district)	66	13	2006-07-28	15	50	both	Individual	4.6	4.9	4.9	4.7	4.8	4.5	4.4	4.8	4.8	4.7	47.1	4.71	TRUE
243	Thailand	13-Mae-eye #1 (Thaton sub-district)	65	09	2006-07-28	14	53	both	Individual	4.6	4.4	4.5	4.2	4.5	4.7	4.7	4.8	4.6	4.3	45.3	4.53	TRUE
242	Thailand	13-Mae-eye #1 (Thaton sub-district)	65	26	2006-07-28	14	65	both	Individual	4.5	4.6	4.1	3.8	4.5	4.3	4.3	4	4	4	42.1	4.21	TRUE
244	Thailand	13-Mae-eye #1 (Thaton sub-district)	67	04	2006-08-04	01	65	both	Individual	4.8	4.9	4.8	4.9	4.7	4.8	4.4	4	5	4.3	46.6	4.66	TRUE
245	Thailand	13-Mae-eye #1 (Thaton sub-district)	70	25	2006-08-06	01	84	both	Individual	4.9	4.9	5	4.9	5	4.8	4.9	5	5	4.5	48.9	4.89	TRUE
246	Thailand	13-Mae-eye #1 (Thaton sub-district)	70	03	2006-08-06	01	72	both	Individual	5	5	5	4.9	5	4.8	5	5	4.8	5	49.5	4.95	TRUE
247	Thailand	2-Maetang #2 (Banchang&Guidchang&In-hta-kin)	09	26	2006-09-11	04	70	both	Individual	4.8	5	4.9	5	5	5	4.8	5	5	5	49.5	4.95	TRUE
249	Thailand	2-Maetang #2 (Banchang&Guidchang&In-hta-kin)	05	25	2006-09-12	02	90	both	Individual	4.7	4.6	4.7	4.3	4.8	4.5	4.4	4.5	4.8	5	46.3	4.63	TRUE
248	Thailand	2-Maetang #2 (Banchang&Guidchang&In-hta-kin)	08	03	2006-09-12	01	84	both	Individual	4.9	5	5	5	4.8	4.8	5	5	5	5	49.5	4.95	TRUE
250	Thailand	2-Maetang #2 (Banchang&Guidchang&In-hta-kin)	08	10	2006-09-17	01	61	both	Individual	4.8	4.9	4.8	4	4.9	4.8	4.6	5	5	5	47.8	4.78	TRUE
251	Thailand	2-Maetang #2 (Banchang&Guidchang&In-hta-kin)	08	09	2006-09-17	01	55	both	Individual	4.5	4.7	4.1	3.4	4.6	4.7	4.3	4.3	4.7	5	44.3	4.43	TRUE
252	Thailand	4-Chiangdao#2 (Pingkong sub-district)	12	25	2006-09-18	01	72	both	Individual	4.7	4.9	4.9	4.8	4.6	4.5	4.3	4.5	4.7	5	46.9	4.69	TRUE
254	Thailand	4-Chiangdao#2 (Pingkong sub-district)	16	12	2006-09-19	15	87	both	Individual	4.8	4.6	4.9	4.6	4.8	4.8	4.6	4.8	5	4.7	47.6	4.76	TRUE
253	Thailand	4-Chiangdao#2 (Pingkong sub-district)	16	13	2006-09-19	15	50	both	Individual	4.7	4.7	4.7	4.6	4.8	4.8	4.7	4.7	4.8	4.8	46.9	4.69	TRUE
255	Thailand	4-Chiangdao#2 (Pingkong sub-district)	13	13	2006-09-25	03	50	both	Individual	4.7	4.9	5	5	5	4.7	4.8	5	N/A	5	44.1	4.9	TRUE
256	Thailand	4-Chiangdao#2 (Pingkong sub-district)	14	04	2006-09-26	01	37	both	Individual	4.9	4.9	5	4.9	4.9	4.8	4.8	4.8	5	5	49	4.9	TRUE
257	Thailand	4-Chiangdao#2 (Pingkong sub-district)	18	26	2006-09-26	03	90	both	Individual	4.7	4.9	4.5	4.6	4.6	4.8	4.6	5	N/A	4.5	42.2	4.22	TRUE
258	Thailand	6-Praow #2 (Sunsai&Banpong sub-district)	21	26	2006-10-02	01	52	both	Individual	4.7	4.9	4.5	4	4.6	4.7	4.2	4	4.7	5	45.3	4.53	TRUE
259	Thailand	6-Praow #2 (Sunsai&Banpong sub-district)	29	25	2006-10-03	01	71	both	Individual	4.7	4.9	4.8	4.7	4.8	5	4.8	5	5	5	48.7	4.87	TRUE
261	Thailand	6-Praow #2 (Sunsai&Banpong sub-district)	21	26	2006-10-04	15	57	both	Individual	4.5	4.7	4.4	4.8	4.6	4.7	4.8	5	4.7	5	47.2	4.72	TRUE
260	Thailand	6-Praow #2 (Sunsai&Banpong sub-district)	21	02	2006-10-04	15	60	both	Individual	4.8	4.9	4.8	4.7	4.6	4.7	4.8	5	4.8	5	48.1	4.81	TRUE
263	Thailand	6-Praow #2 (Sunsai&Banpong sub-district)	29	13	2006-10-09	01	64	both	Individual	4.8	5	4.6	4.8	4.9	4.8	5	5	4.8	4.5	48.2	4.82	TRUE
262	Thailand	6-Praow #2 (Sunsai&Banpong sub-district)	23	25	2006-10-09	04	55	both	Individual	4.8	5	5	4.9	5	5	5	5	5	5	49.7	4.97	TRUE
264	Thailand	6-Praow #2 (Sunsai&Banpong sub-district)	29	09	2006-10-09	01	81	both	Individual	4.8	4.7	4.8	4.6	4.8	4.8	4.7	4.5	4.7	5	47.4	4.74	TRUE
265	Thailand	6-Praow #2 (Sunsai&Banpong sub-district)	27	04	2006-10-10	01	49	both	Individual	5	5	4.9	4.8	4.9	5	5	5	5	5	49.6	4.96	TRUE
266	Thailand	6-Praow #2 (Sunsai&Banpong sub-district)	28	10	2006-10-15	01	56	both	Individual	4.8	4.7	4.6	4.8	4.5	4.7	5	4.8	5	5	47.9	4.79	TRUE
268	Thailand	6-Praow #2 (Sunsai&Banpong sub-district)	24	03	2006-10-16	01	49	both	Individual	5	5	5	5	4.9	5	5	5	5	5	49.9	4.99	TRUE
267	Thailand	6-Praow #2 (Sunsai&Banpong sub-district)	24	26	2006-10-16	03	50	both	Individual	4.8	4.7	4.7	4.7	4.8	4.8	4.7	4.5	4.8	5	47.5	4.75	TRUE
269	Thailand	6-Praow #2 (Sunsai&Banpong sub-district)	22	13	2006-10-17	03	35	both	Individual	4.8	4.7	4.9	4.6	5	4.8	4.9	5	4.8	5	48.5	4.85	TRUE
270	Thailand	8-Chaiprakarn #2 (Maethalope sub-district)	32	09	2006-10-18	02	75	both	Individual	4.7	4.7	4.4	4.2	4.8	4.8	4.4	4.5	N/A	5	41.5	4.61	TRUE
272	Thailand	8-Chaiprakarn #2 (Maethalope sub-district)	35	02	2006-10-21	01	120	both	Individual	4.9	5	5	5	4.9	5	5	5	5	5	49.8	4.98	TRUE
271	Thailand	8-Chaiprakarn #2 (Maethalope sub-district)	35	12	2006-10-21	01	63	both	Individual	4.6	4.7	4.6	4.5	4.8	4.8	4.6	4.8	4.6	4.5	46.5	4.65	TRUE
273	Thailand	9-Fang #1(MaeKha sub-district)	43	10	2006-11-01	02	48	both	Individual	4.8	4.9	4.8	4.6	4.7	4.7	4.8	4.8	5	5	48.1	4.81	TRUE
274	Thailand	9-Fang #1(MaeKha sub-district)	49	12	2006-11-05	01	109	both	Individual	4.4	4.4	4.4	4.4	4.5	4.5	4.4	3.5	N/A	4.5	39	4.3	TRUE
275	Thailand	9-Fang #1(MaeKha sub-district)	49	13	2006-11-05	01	48	both	Individual	4.7	5	4.7	4.9	4.8	4.8	4.8	5	4.5	5	48.2	4.82	TRUE
277	Thailand	9-Fang #1(MaeKha sub-district)	02	10	2006-11-06	01	71	both	Individual	4.4	4.6	4.4	4	4.6	4.5	4.4	4.5	4.5	4.5	44.4	4.44	TRUE
276	Thailand	9-Fang #1(MaeKha sub-district)	02	26	2006-11-06	01	59	both	Individual	4.8	4.9	4.6	4.9	4.6	4.8	4.7	4.8	4.5	5	47.6	4.76	TRUE
278	Thailand	9-Fang #1(MaeKha sub-district)	47	25	2006-11-07	01	68	both	Individual	4.5	4.4	4.4	4.5	4.6	4.7	4.7	4.8	5	5	46.6	4.66	TRUE
279	Thailand	9-Fang #1(MaeKha sub-district)	47	09	2006-11-08	01	41	both	Individual	4.7	5	4.8	4.9	4.9	4.8	4.4	4.8	4.3	5	47.6	4.76	TRUE
280	Thailand	9-Fang #1(MaeKha sub-district)	49	26	2006-11-08	03	108	both	Individual	4.9	4.9	4.9	4.8	4.7	4.6	4.4	4.3	4.3	4.8	46.6	4.66	TRUE
281	Thailand	12-Fang #4 (Monpin sub-district)	56	12	2006-11-15	14	55	both	Individual	4.8	4.9	4.4	4.1	4.7	4.8	4.8	4.5	N/A	4.7	41.7	4.63	TRUE
282	Thailand	12-Fang #4 (Monpin sub-district)	56	13	2006-11-15	14	48	both	Individual	4.9	5	4.4	4.8	4.8	4.8	4.8	5	4.8	4.5	47.8	4.78	TRUE
283	Thailand	12-Fang #4 (Monpin sub-district)	55	03	2006-11-19	06	49	both	Individual	5	5	5	5	5	5	5	5	5	5	50	5	TRUE
284	Thailand	12-Fang #4 (Monpin sub-district)	58	04	2006-11-20	01	72	both	Individual	5	4.9	4.9	4.9	4.9	4.6	4.4	4.8	4.3	4.6	47.3	4.73	TRUE
285	Thailand	12-Fang #4 (Monpin sub-district)	56	02	2006-11-21	01	62	both	Individual	5	5	4.9	4.9	5	4.9	5	5	5	5	49.7	4.97	TRUE
									AVG	4.59886	4.54847	4.43498	4.20951	4.51901	4.51885	4.32695	4.27751	4.45085	4.73243	43.5057	4.44342

## Sheet: Thai VCT Y-2
Entry Order	Site	Community Name	Venue	Counselor ID	Date of Evaluation	Evaluator	Session Length	Pre Test or Post Test	Individual or Couple	A - Basic Skills	B - Introduction	C - Risk Assessment	D - Reducing Risk	E - Test Preparation	F - Giving Result	G - Risk Reduction	H - RR Plan	I - Disclosure	J - Support	GRAND TOTAL	GRAND AVERAGE	Narrative Comments
288	Thailand	8-Chaiprakarn #2 (Maethalope sub-district)	34	42	2007-02-06	04	50	pre-test	Individual	4.3	4	4.4	4.3	4.7	4.3	3.9	3.3	4	4	41.2	4.12	TRUE
290	Thailand	8-Chaiprakarn #2 (Maethalope sub-district)	33	34	2007-02-06	01	67	pre-test	Individual	4.8	4.7	4.6	4.2	4.7	4.7	4.6	4.5	4.5	4.5	45.8	4.58	TRUE
286	Thailand	8-Chaiprakarn #2 (Maethalope sub-district)	32	10	2007-02-06	03	60	pre-test	Individual	4.6	4.9	4.8	4.4	4.7	N/A	N/A	N/A	N/A	N/A	23.4	4.68	TRUE
291	Thailand	8-Chaiprakarn #2 (Maethalope sub-district)	33	31	2007-02-06	01	80	pre-test	Individual	4.2	4	3.9	4	4.5	4	4.1	N/A	4.5	4	37.2	4.13	TRUE
289	Thailand	8-Chaiprakarn #2 (Maethalope sub-district)	32	41	2007-02-06	02	47	pre-test	Individual	4.8	4.6	4.3	3.9	4.7	4.8	4.3	4	4.3	4.5	44.2	4.42	TRUE
287	Thailand	8-Chaiprakarn #2 (Maethalope sub-district)	32	30	2007-02-06	02	36	pre-test	Individual	4.8	4.4	4.4	3.3	4.4	4.7	4	3	4.7	4.5	42.2	4.22	TRUE
292	Thailand	8-Chaiprakarn #2 (Maethalope sub-district)	36	30	2007-02-11	03	49	pre-test	Individual	4.7	4.6	4.8	4.4	4.8	4.3	4	4	4.3	4.5	44.4	4.44	TRUE
293	Thailand	8-Chaiprakarn #2 (Maethalope sub-district)	37	41	2007-02-12	04	55	pre-test	Individual	4.5	4.4	4.7	4.2	4.7	4.7	4.3	4.5	N/A	5	41	4.56	TRUE
294	Thailand	2-Maetang #2 (Banchang&Guidchang&In-hta-kin)	07	31	2007-02-18	02	79	pre-test	Individual	4.4	4.6	4.6	3.6	4.2	4.3	3.9	3.5	4.7	4.5	42.3	4.23	TRUE
295	Thailand	2-Maetang #2 (Banchang&Guidchang&In-hta-kin)	09	30	2007-02-19	29	45	pre-test	Individual	4.5	4.1	4.1	4.1	4.1	3.7	N/A	N/A	4	4.3	32.9	4.11	TRUE
297	Thailand	2-Maetang #2 (Banchang&Guidchang&In-hta-kin)	02	30	2007-02-20	29	35	pre-test	Individual	4.8	4.1	4.3	4	4.2	4.5	N/A	N/A	4.2	4	34.1	4.26	TRUE
296	Thailand	2-Maetang #2 (Banchang&Guidchang&In-hta-kin)	01	41	2007-02-20	04	37	pre-test	Individual	4.5	4.3	4.5	4.3	4.8	4.8	4.2	4	4.7	5	45.1	4.51	TRUE
298	Thailand	2-Maetang #2 (Banchang&Guidchang&In-hta-kin)	10	42	2007-02-28	02	78	pre-test	Individual	4.8	4.4	4.7	3.9	4.5	4	4.4	3	4.5	4.7	42.9	4.29	TRUE
299	Thailand	2-Maetang #2 (Banchang&Guidchang&In-hta-kin)	08	31	2007-03-01	03	60	pre-test	Individual	4.7	4.1	4.4	4.1	4.3	4	4.2	5	4.8	4.5	44.1	4.41	TRUE
300	Thailand	4-Chiangdao#2 (Pingkong sub-district)	12	34	2007-03-05	04	35	pre-test	Individual	4.5	4.6	4.5	4.3	4.7	4.8	4.3	4.5	4.8	4.5	45.5	4.55	TRUE
301	Thailand	4-Chiangdao#2 (Pingkong sub-district)	16	31	2007-03-07	04	68	both	Individual	4.5	4.7	4.9	4.9	4.9	4.8	4.3	4.3	4.2	5	46.5	4.65	TRUE
304	Thailand	4-Chiangdao#2 (Pingkong sub-district)	16	41	2007-03-08	03	43	both	Individual	4.8	4.3	4.6	4.6	4.8	4.5	4.2	3.5	4	4.5	43.8	4.38	TRUE
302	Thailand	4-Chiangdao#2 (Pingkong sub-district)	11	42	2007-03-08	01	45	both	Individual	4.5	4.1	4.3	3.9	4.6	4.2	3.6	3	5	4.5	41.7	4.17	TRUE
303	Thailand	4-Chiangdao#2 (Pingkong sub-district)	11	32	2007-03-08	02	56	both	Individual	4.7	4.4	4.2	4	4.7	4.5	4.4	3.8	4.3	4.5	43.5	4.35	TRUE
309	Thailand	6-Praow #2 (Sunsai&Banpong sub-district)	22	46	2007-03-20	29	33	both	Individual	4.1	3.9	4	3.8	4.3	4	3.9	3.8	4	4	39.8	3.98	TRUE
305	Thailand	6-Praow #2 (Sunsai&Banpong sub-district)	22	30	2007-03-20	14	45	both	Individual	4.6	4.6	4.2	4.1	4.7	4.7	4.3	5	5	5	46.2	4.62	TRUE
306	Thailand	6-Praow #2 (Sunsai&Banpong sub-district)	22	32	2007-03-20	14	60	both	Individual	4.8	4.7	4.8	4.7	4.8	4.8	4.7	5	4.3	5	47.6	4.76	TRUE
308	Thailand	6-Praow #2 (Sunsai&Banpong sub-district)	22	35	2007-03-20	29	38	both	Individual	4.2	4	3.9	3.6	4	4	N/A	N/A	3.5	4	31.2	3.9	TRUE
310	Thailand	6-Praow #2 (Sunsai&Banpong sub-district)	22	31	2007-03-20	29	46	both	Individual	3.8	3.6	3.8	3.7	3.9	3.7	3.7	3	3.8	3.7	36.7	3.67	TRUE
313	Thailand	6-Praow #2 (Sunsai&Banpong sub-district)	22	43	2007-03-20	15	47	both	Individual	4.6	4.7	4.7	4.4	4.6	4.8	4.4	4.5	4.8	4.5	46	4.6	TRUE
312	Thailand	6-Praow #2 (Sunsai&Banpong sub-district)	22	41	2007-03-20	15	56	both	Individual	4.8	5	4.7	4.6	4.7	5	4.6	4.5	4.8	4.5	47.2	4.72	TRUE
311	Thailand	6-Praow #2 (Sunsai&Banpong sub-district)	22	36	2007-03-20	15	52	both	Individual	4.5	4.3	4.5	4.3	4.6	4.5	4.3	4.8	4.7	4.5	45	4.5	TRUE
307	Thailand	6-Praow #2 (Sunsai&Banpong sub-district)	22	42	2007-03-20	14	50	both	Individual	4.8	4.6	4.6	4.4	4.7	4.7	4.8	4.8	4.7	4.5	46.6	4.66	TRUE
319	Thailand	6-Praow #2 (Sunsai&Banpong sub-district)	26	39	2007-03-27	29	42	both	Individual	4	3.7	3.6	4.1	3.8	4	3.8	N/A	3.2	4	34.2	3.8	TRUE
318	Thailand	6-Praow #2 (Sunsai&Banpong sub-district)	26	26	2007-03-27	29	52	both	Individual	4.3	4.6	4.1	4.4	4.5	4.5	3.9	N/A	4	4.5	38.8	4.31	TRUE
316	Thailand	6-Praow #2 (Sunsai&Banpong sub-district)	26	10	2007-03-27	15	50	both	Individual	4.9	5	5	4.9	4.8	4.8	4.9	4.8	5	4.5	48.6	4.86	TRUE
317	Thailand	6-Praow #2 (Sunsai&Banpong sub-district)	26	13	2007-03-27	15	39	both	Individual	4.8	4.9	4.8	4.7	4.8	5	4.8	4.8	5	4.3	47.9	4.79	TRUE
314	Thailand	6-Praow #2 (Sunsai&Banpong sub-district)	26	09	2007-03-27	14	48	both	Individual	4.8	4.6	4.8	4.7	4.8	4.8	N/A	N/A	5	5	38.5	4.81	TRUE
315	Thailand	4-Chiangdao#2 (Pingkong sub-district)	27	34	2007-03-27	14	37	both	Individual	4.8	4.6	4.5	4.2	4.5	4.8	4.3	4.8	4.7	5	46.2	4.62	TRUE
320	Thailand	6-Praow #2 (Sunsai&Banpong sub-district)	27	30	2007-03-28	01	45	both	Individual	4.7	4.3	4.3	4.4	4.8	4.5	4.3	N/A	4.7	5	41	4.56	TRUE
321	Thailand	6-Praow #2 (Sunsai&Banpong sub-district)	29	32	2007-04-02	03	55	both	Individual	4.8	4.9	4.8	4.6	4.6	4.5	3.4	3	4	4.5	43.1	4.31	TRUE
324	Thailand	6-Praow #2 (Sunsai&Banpong sub-district)	29	04	2007-04-03	14	54	both	Individual	4.8	4.9	4.4	4.1	4.7	4.5	4.4	4.8	4.7	5	46.3	4.63	TRUE
327	Thailand	6-Praow #2 (Sunsai&Banpong sub-district)	29	03	2007-04-03	15	53	both	Individual	5	4.9	4.9	4.7	4.8	5	4.9	5	5	4.6	48.8	4.88	TRUE
323	Thailand	6-Praow #2 (Sunsai&Banpong sub-district)	29	42	2007-04-03	29	55	both	Individual	4.2	4.1	4.1	4	4.2	4	3.9	N/A	5	4.5	38	4.22	TRUE
322	Thailand	6-Praow #2 (Sunsai&Banpong sub-district)	29	02	2007-04-03	29	50	both	Individual	4.2	4.3	4.1	4.1	4.3	4.3	4.1	N/A	4.2	4	37.6	4.18	TRUE
326	Thailand	6-Praow #2 (Sunsai&Banpong sub-district)	29	32	2007-04-03	15	65	both	Individual	4.6	4.7	4.8	4.6	4.8	4.7	4.4	4.3	4.7	4.3	45.9	4.59	TRUE
325	Thailand	6-Praow #2 (Sunsai&Banpong sub-district)	29	31	2007-04-03	14	71	both	Individual	4.7	4.3	4.8	4.4	4.7	5	4.6	4.8	4.4	4.5	46.2	4.62	TRUE
331	Thailand	2-Maetang #2 (Banchang&Guidchang&In-hta-kin)	03	41	2007-04-20	15	50	both	Individual	4.7	4.9	4.8	4.6	4.5	5	4.9	4.5	5	4.4	47.3	4.73	TRUE
330	Thailand	2-Maetang #2 (Banchang&Guidchang&In-hta-kin)	03	34	2007-04-20	15	46	both	Individual	4.6	4.7	4.8	4.4	4.7	4.7	4.6	4.3	4.7	4.4	45.9	4.59	TRUE
329	Thailand	2-Maetang #2 (Banchang&Guidchang&In-hta-kin)	03	43	2007-04-20	14	50	both	Individual	4.6	4.7	4.8	4.4	4.7	4.7	4.6	4.3	4.7	4.4	45.9	4.59	TRUE
328	Thailand	2-Maetang #2 (Banchang&Guidchang&In-hta-kin)	03	36	2007-04-20	14	50	both	Individual	3.8	4.4	3.6	3.6	3.8	4.6	3.8	4	N/A	3.7	35.9	3.92	TRUE
332	Thailand	12-Fang #4 (Monpin sub-district)	61	30	2007-04-24	03	65	both	Individual	4.8	4.7	4.6	4.3	4.7	4.8	4.8	5	4.8	4.5	47	4.7	TRUE
333	Thailand	12-Fang #4 (Monpin sub-district)	59	53	2007-05-01	03	31	both	Individual	4.5	3.9	3.5	3.2	3.5	4	4	3.5	3.8	3.5	37.4	3.74	TRUE
334	Thailand	12-Fang #4 (Monpin sub-district)	62	34	2007-05-03	02	43	both	Individual	4.8	4.7	4.5	4.1	4.5	4.7	4.3	4.3	N/A	4.5	40.4	4.49	TRUE
338	Thailand	9-Fang #1(MaeKha sub-district)	44	10	2007-05-08	14	53	both	Individual	4.7	4.7	4.4	4.7	4.8	4.6	4.7	4.8	4.9	4.7	47	4.7	TRUE
337	Thailand	9-Fang #1(MaeKha sub-district)	44	31	2007-05-08	15	60	both	Individual	4.4	3.9	4.6	4.4	4.6	5	4.3	4	4.7	4.5	44.4	4.44	TRUE
336	Thailand	9-Fang #1(MaeKha sub-district)	44	13	2007-05-08	29	35	both	Individual	4.4	4.3	4.3	3.9	4.5	4.5	4.1	4.3	4.5	4.5	43.3	4.33	TRUE
335	Thailand	9-Fang #1(MaeKha sub-district)	44	09	2007-05-08	15	37	both	Individual	4.8	5	4.6	4.7	4.8	5	4.4	4.5	4.5	4.8	47.1	4.71	TRUE
339	Thailand	9-Fang #1(MaeKha sub-district)	39	55	2007-05-14	03	40	both	Individual	4	3.6	3.5	3.4	3.3	4.5	3.3	3.3	4.8	3.5	37.2	3.72	TRUE
340	Thailand	9-Fang #1(MaeKha sub-district)	41	42	2007-05-17	03	49	both	Individual	4.8	4.6	5	4.8	4.9	4.7	4.6	5	4.7	4.5	47.6	4.76	TRUE
347	Thailand	13-Mae-eye #1 (Thaton sub-district)	63	43	2007-05-21	29	62	both	Individual	4.8	4.6	4.8	4.7	4.8	5	4.6	5	N/A	4.5	42.8	4.76	TRUE
341	Thailand	13-Mae-eye #1 (Thaton sub-district)	63	33	2007-05-21	04	65	both	Individual	4.3	4.1	4.1	4.1	4.4	4.3	4.2	4	4.7	4.5	42.7	4.27	TRUE
342	Thailand	13-Mae-eye #1 (Thaton sub-district)	63	41	2007-05-21	14	60	both	Individual	4.7	4.7	4.3	4	4.6	4.5	4.1	4.3	4.5	4.7	44.4	4.44	TRUE
343	Thailand	13-Mae-eye #1 (Thaton sub-district)	63	36	2007-05-21	36	14	both	Individual	4.8	4.6	4.6	4.3	4.5	4.7	3.9	4	4.3	4.3	44	4.4	TRUE
344	Thailand	13-Mae-eye #1 (Thaton sub-district)	63	42	2007-05-21	15	57	both	Individual	5	5	4.9	4.6	4.9	4.8	4.8	5	4.7	4.5	48.2	4.82	TRUE
345	Thailand	13-Mae-eye #1 (Thaton sub-district)	63	30	2007-05-21	15	55	both	Individual	4.8	4.7	4.7	4.6	4.8	5	4.4	4.8	5	4.6	47.4	4.74	TRUE
346	Thailand	13-Mae-eye #1 (Thaton sub-district)	63	32	2007-05-21	29	55	both	Individual	4.8	4.6	4.7	5	4.8	4.8	N/A	N/A	N/A	5	33.7	4.81	TRUE
348	Thailand	13-Mae-eye #1 (Thaton sub-district)	72	48	2007-05-23	03	41	both	Individual	4.6	3.9	4.3	3.6	4.8	4.5	3.3	3.3	3.8	4.5	40.6	4.06	TRUE
349	Thailand	13-Mae-eye #1 (Thaton sub-district)	64	09	2007-05-24	02	45	both	Individual	4.7	4.7	4.7	4	4.5	4.7	4.2	4.8	4.7	5	46	4.6	TRUE
353	Thailand	8-Chaiprakarn #2 (Maethalope sub-district)	32	34	2007-06-26	01	54	both	Individual	4.8	4.7	4.3	4.3	5	4.3	4.6	3	N/A	4.8	39.8	4.42	TRUE
351	Thailand	8-Chaiprakarn #2 (Maethalope sub-district)	32	02	2007-06-26	15	60	both	Individual	5	5	4.9	4.8	4.8	5	4.7	4.8	4.7	4.6	48.3	4.83	TRUE
352	Thailand	8-Chaiprakarn #2 (Maethalope sub-district)	32	37	2007-06-26	14	98	both	Individual	4.5	4.3	4.1	4.5	4	4.7	4.3	4	4.2	4	42.6	4.26	TRUE
350	Thailand	8-Chaiprakarn #2 (Maethalope sub-district)	32	04	2007-06-26	15	60	both	Individual	5	4.9	4.9	4.9	4.8	5	4.8	5	5	4.8	49.1	4.91	TRUE
354	Thailand	8-Chaiprakarn #2 (Maethalope sub-district)	33	03	2007-06-27	01	53	both	Individual	5	5	4.9	4.9	5	5	5	5	N/A	5	44.8	4.98	TRUE
355	Thailand	8-Chaiprakarn #2 (Maethalope sub-district)	33	13	2007-06-27	01	55	both	Individual	4.2	4.9	4.3	4.4	4.4	4.7	5	4.8	5	5	46.7	4.67	TRUE
356	Thailand	8-Chaiprakarn #2 (Maethalope sub-district)	33	31	2007-06-27	02	80	both	Individual	4.7	4.4	4.1	3.8	4.7	4.7	4.4	4	4.8	4.5	44.1	4.41	TRUE
357	Thailand	8-Chaiprakarn #2 (Maethalope sub-district)	33	09	2007-06-27	04	41	both	Individual	5	5	5	4.6	5	4.8	4.6	4.5	4.3	5	47.8	4.78	TRUE
358	Thailand	8-Chaiprakarn #2 (Maethalope sub-district)	33	10	2007-06-27	03	67	both	Individual	4.9	4.6	4.6	4.6	4.9	4.8	4.9	5	N/A	5	43.3	4.81	TRUE
361	Thailand	8-Chaiprakarn #2 (Maethalope sub-district)	34	46	2007-07-02	02	65	both	Individual	4.8	4.7	4.7	4.1	4.2	4.8	4	4.3	4.4	3.7	43.7	4.37	TRUE
359	Thailand	8-Chaiprakarn #2 (Maethalope sub-district)	34	64	2007-07-02	01	57	both	Individual	4.5	4.1	4.6	4	4.5	4	4.2	3.5	4.2	4.5	42.1	4.21	TRUE
360	Thailand	8-Chaiprakarn #2 (Maethalope sub-district)	34	65	2007-07-02	04	53	both	Individual	4.6	4.7	4.9	4	4.6	4.8	4.4	4	4.8	4.5	45.3	4.53	TRUE
362	Thailand	8-Chaiprakarn #2 (Maethalope sub-district)	35	37	2007-07-04	03	69	both	Individual	4.8	4.4	4.5	4.4	4.4	4.2	4.9	5	N/A	4.5	41.1	4.57	TRUE
366	Thailand	2-Maetang #2 (Banchang&Guidchang&In-hta-kin)	02	46	2007-07-23	15	80	both	Individual	4.7	4.6	4.7	4.6	4.8	4.8	4.4	4.8	4.4	4.8	46.6	4.66	TRUE
363	Thailand	2-Maetang #2 (Banchang&Guidchang&In-hta-kin)	02	64	2007-07-23	14	77	both	Individual	4.8	4.6	4.6	4.6	4.5	4.5	4	4.3	N/A	4.5	40.4	4.49	TRUE
364	Thailand	2-Maetang #2 (Banchang&Guidchang&In-hta-kin)	02	65	2007-07-23	14	67	both	Individual	4.3	4.1	4.7	3	3.9	4.3	4.2	4.3	3.3	4.5	40.6	4.06	TRUE
365	Thailand	2-Maetang #2 (Banchang&Guidchang&In-hta-kin)	02	31	2007-07-23	15	60	both	Individual	4.5	4.7	4.7	4.6	4.7	5	4.4	4.5	4.5	4.5	46.1	4.61	TRUE
367	Thailand	2-Maetang #2 (Banchang&Guidchang&In-hta-kin)	09	46	2007-07-30	14	92	both	Individual	4.4	4.6	3.5	3.4	4.4	3.8	3.7	3.5	N/A	4.5	35.8	3.98	TRUE
369	Thailand	2-Maetang #2 (Banchang&Guidchang&In-hta-kin)	09	37	2007-07-30	15	60	both	Individual	4.6	4.6	4.9	4.6	4.8	4.7	4.6	4.5	4.8	4.8	46.9	4.69	TRUE
370	Thailand	2-Maetang #2 (Banchang&Guidchang&In-hta-kin)	09	32	2007-07-30	15	80	both	Individual	4.5	4.7	4.8	4.4	4.8	4.8	4	4.3	4.2	4.4	44.9	4.49	TRUE
368	Thailand	2-Maetang #2 (Banchang&Guidchang&In-hta-kin)	09	42	2007-07-30	14	52	both	Individual	4.8	4.9	4.9	4.6	4.3	4.7	4.4	4.8	4.5	5	46.9	4.69	TRUE
371	Thailand	4-Chiangdao#2 (Pingkong sub-district)	15	64	2007-08-06	15	83	both	Individual	4.6	4.7	4.6	4.4	4.5	4.8	4.4	4.5	4.7	4.3	45.5	4.55	TRUE
372	Thailand	4-Chiangdao#2 (Pingkong sub-district)	12	65	2007-08-07	01	67	both	Individual	3.8	3.9	3.9	3.1	3.8	4	3.6	3	3.6	3.7	36.4	3.64	TRUE
373	Thailand	4-Chiangdao#2 (Pingkong sub-district)	12	43	2007-08-07	04	48	both	Individual	4.8	4.9	5	4.9	4.8	4.8	4.3	4	4.5	5	47	4.7	TRUE
374	Thailand	4-Chiangdao#2 (Pingkong sub-district)	20	31	2007-08-08	03	63	both	Individual	4.8	4.9	4.7	4.1	5	4.7	4.9	4.3	4.2	5	46.6	4.66	TRUE
375	Thailand	4-Chiangdao#2 (Pingkong sub-district)	20	34	2007-08-08	02	40	both	Individual	4.8	4.6	4.7	4.8	4.6	4.8	4.7	4.8	N/A	4.5	42.3	4.7	TRUE
377	Thailand	4-Chiangdao#2 (Pingkong sub-district)	19	10	2007-08-13	04	40	both	Individual	4.8	5	4.8	4.8	4.8	4.8	4.9	4.8	4.5	5	48.2	4.82	TRUE
378	Thailand	4-Chiangdao#2 (Pingkong sub-district)	19	65	2007-08-13	03	80	both	Individual	4.8	4.3	4.2	3.7	4.3	4.3	3.2	3.5	4	5	41.3	4.13	TRUE
376	Thailand	4-Chiangdao#2 (Pingkong sub-district)	19	13	2007-08-13	02	35	both	Individual	4.9	4.7	4.6	4.6	4.7	4.8	4.3	N/A	4.8	4.5	41.9	4.66	TRUE
379	Thailand	4-Chiangdao#2 (Pingkong sub-district)	19	09	2007-08-14	01	49	both	Individual	4.6	5	4.2	4.1	4.5	4.2	4.6	3.5	4.7	5	44.4	4.44	TRUE
380	Thailand	4-Chiangdao#2 (Pingkong sub-district)	19	64	2007-08-14	03	45	both	Individual	4.8	4.7	4.9	4.6	4.7	4.8	3.4	5	4	5	45.9	4.59	TRUE
383	Thailand	6-Praow #2 (Sunsai&Banpong sub-district)	21	10	2007-08-21	15	40	both	Individual	4.8	5	4.9	4.7	4.8	4.8	4.8	5	5	4.6	48.4	4.84	TRUE
382	Thailand	6-Praow #2 (Sunsai&Banpong sub-district)	21	13	2007-08-21	14	40	both	Individual	4.9	4.9	4.7	4.8	4.8	5	4.6	4.8	4.8	5	48.3	4.83	TRUE
381	Thailand	6-Praow #2 (Sunsai&Banpong sub-district)	21	34	2007-08-21	14	40	both	Individual	4.7	4.6	4.8	4.7	4.5	4.7	4.7	5	4.7	4.8	47.2	4.72	TRUE
384	Thailand	6-Praow #2 (Sunsai&Banpong sub-district)	21	65	2007-08-21	15	47	both	Individual	4.7	4.9	4.4	4.3	4.3	5	4.3	4.5	4.8	4.6	45.8	4.58	TRUE
387	Thailand	6-Praow #2 (Sunsai&Banpong sub-district)	25	43	2007-08-28	15	45	both	Individual	4.8	4.6	4.7	4.2	4.6	4.7	4.3	4	4.5	4.4	44.8	4.48	TRUE
388	Thailand	6-Praow #2 (Sunsai&Banpong sub-district)	25	32	2007-08-28	14	50	both	Individual	4.8	4.6	4.7	4.4	4.6	4.7	4.4	4	4.8	5	46	4.6	TRUE
386	Thailand	6-Praow #2 (Sunsai&Banpong sub-district)	25	42	2007-08-28	15	50	both	Individual	5	4.7	5	4.7	4.8	4.8	4.6	4.3	4.8	4.6	47.3	4.73	TRUE
385	Thailand	6-Praow #2 (Sunsai&Banpong sub-district)	25	31	2007-08-28	14	61	both	Individual	4.9	4.7	4.6	4.9	4.8	5	4.8	4.8	4.8	4.5	47.8	4.78	TRUE
390	Thailand	6-Praow #2 (Sunsai&Banpong sub-district)	26	65	2007-08-29	02	50	both	Individual	4.2	3.9	3.5	3.2	4	4.5	4	N/A	N/A	4	31.3	3.91	TRUE
389	Thailand	6-Praow #2 (Sunsai&Banpong sub-district)	26	46	2007-08-29	04	52	both	Individual	4.5	4.9	5	4.6	4.8	4.7	4.4	4	N/A	5	41.9	4.66	TRUE
392	Thailand	6-Praow #2 (Sunsai&Banpong sub-district)	23	09	2007-08-30	03	43	both	Individual	4.9	5	4.9	4.8	4.9	4.5	4.7	5	N/A	5	43.7	4.86	TRUE
391	Thailand	6-Praow #2 (Sunsai&Banpong sub-district)	23	13	2007-08-30	04	37	both	Individual	4.8	5	5	4.8	4.9	4.7	4.9	5	4	5	48.1	4.81	TRUE
394	Thailand	6-Praow #2 (Sunsai&Banpong sub-district)	23	64	2007-08-30	02	55	both	Individual	4.8	4.4	4.5	4.2	4.3	4.5	4.7	4.8	4.3	3.5	44	4.4	TRUE
393	Thailand	6-Praow #2 (Sunsai&Banpong sub-district)	23	10	2007-08-30	01	45	both	Individual	4.6	4.1	4.3	3.9	4.6	4.7	4.8	4	4	4.3	43.3	4.33	TRUE
396	Thailand	12-Fang #4 (Monpin sub-district)	60	03	2007-09-10	01	50	both	Individual	5	5	5	5	4.9	5	5	5	5	5	49.9	4.99	TRUE
395	Thailand	12-Fang #4 (Monpin sub-district)	60	64	2007-09-10	04	53	both	Individual	4.8	5	4.6	4.6	4.8	4.8	4.7	4.5	5	4.5	47.3	4.73	TRUE
397	Thailand	12-Fang #4 (Monpin sub-district)	56	65	2007-09-11	04	45	pre-test	Individual	4.8	4.9	4.9	4.6	4.9					4.5	28.6	4.77	TRUE
398	Thailand	12-Fang #4 (Monpin sub-district)	57	02	2007-09-12	01	66	both	Individual	4.9	4.9	4.9	4.9	5	4.8	4.9	4.8	4.9	5	49	4.9	TRUE
400	Thailand	12-Fang #4 (Monpin sub-district)	62	65	2007-09-13	02	54	both	Individual	4.4	4.6	4	3.7	4.5	4.8	3.9	4	N/A	4.5	38.4	4.27	TRUE
399	Thailand	12-Fang #4 (Monpin sub-district)	62	04	2007-09-13	01	50	both	Individual	4.9	4.9	5	5	4.8	4.8	4.8	4.8	4.8	5	48.8	4.88	TRUE
403	Thailand	12-Fang #4 (Monpin sub-district)	57	40	2007-09-18	15	76	both	Individual	4.8	4.7	5	4.6	4.8	4.8	4.8	4.3	4.7	4.3	46.8	4.68	TRUE
406	Thailand	12-Fang #4 (Monpin sub-district)	57	43	2007-09-18	29	69	both	Individual	4.3	4.1	4.3	4.6	4.3	4.5	4.4	4.3	4.5	4	43.3	4.33	TRUE
405	Thailand	12-Fang #4 (Monpin sub-district)	57	42	2007-09-18	29	42	both	Individual	4.5	4.6	4.5	4.6	4.5	4.8	4.3	4	4.7	4.5	45	4.5	TRUE
404	Thailand	12-Fang #4 (Monpin sub-district)	57	34	2007-09-18	15	53	both	Individual	4.8	4.7	4.9	4.7	4.8	4.8	4.3	4.3	4.8	4.5	46.6	4.66	TRUE
402	Thailand	12-Fang #4 (Monpin sub-district)	57	65	2007-09-18	14	77	both	Individual	4.5	4.6	4	4	4.3	4.3	4.6	4	4.3	4	42.6	4.26	TRUE
401	Thailand	12-Fang #4 (Monpin sub-district)	57	46	2007-09-18	14	60	both	Individual	4.7	4.7	4	4.3	4.5	4.5	4.2	4	4.3	4	43.2	4.32	TRUE
408	Thailand	9-Fang #1(MaeKha sub-district)	42	65	2007-10-02	29	103	both	Individual	4	4.1	4.1	3.9	3.9	4.3	4	N/A	N/A	4	32.3	4.04	TRUE
409	Thailand	9-Fang #1(MaeKha sub-district)	42	02	2007-10-02	14	40	both	Individual	4.8	4.9	5	5	4.9	5	4.9	5	N/A	5	44.5	4.94	TRUE
410	Thailand	9-Fang #1(MaeKha sub-district)	42	64	2007-10-02	14	77	both	Individual	4.6	4.7	4.1	4.7	4.7	4.8	4.3	4.5	4.6	4.8	45.8	4.58	TRUE
411	Thailand	9-Fang #1(MaeKha sub-district)	42	32	2007-10-02	15	54	both	Individual	4.7	4.6	4.9	4.8	4.8	4.8	4.6	4.3	4.3	4.4	46.2	4.62	TRUE
412	Thailand	9-Fang #1(MaeKha sub-district)	42	31	2007-10-02	15	48	both	Individual	4.8	4.9	4.8	4.4	4.8	4.8	4.4	4.5	4.8	4.6	46.8	4.68	TRUE
407	Thailand	9-Fang #1(MaeKha sub-district)	42	46	2007-10-02	29	52	both	Individual	4.1	4.3	4	4.4	4.4	4.3	4.1	4	4.2	4.5	42.3	4.23	TRUE
417	Thailand	13-Mae-eye #1 (Thaton sub-district)	72	32	2007-10-09	04	58	both	Individual	4.6	4.9	4.9	4.8	4.9	4.8	4.6	5	5	5	48.5	4.85	TRUE
413	Thailand	13-Mae-eye #1 (Thaton sub-district)	72	64	2007-10-09	01	61	both	Individual	4.5	4.9	4.3	4.3	4.7	4.3	4.7	4.6	4.8	4.5	45.6	4.56	TRUE
414	Thailand	13-Mae-eye #1 (Thaton sub-district)	72	34	2007-10-09	03	41	both	Individual	4.8	4.7	4.4	4.7	4.9	4.7	4.7	4.5	N/A	5	42.4	4.71	TRUE
415	Thailand	13-Mae-eye #1 (Thaton sub-district)	72	42	2007-10-09	02	42	both	Individual	4.8	4.4	3.9	4.2	4.4	4.8	4.7	4.5	N/A	4.5	40.2	4.47	TRUE
416	Thailand	13-Mae-eye #1 (Thaton sub-district)	72	03	2007-10-09	01	46	both	Individual	5	5	5	5	5	4.9	5	5	5	5	49.9	4.99	TRUE
422	Thailand	13-Mae-eye #1 (Thaton sub-district)	65	10	2007-10-10	04	31	both	Individual	4.9	4.9	4.9	4.4	4.9	5	4.9	5	5	4.5	48.4	4.84	TRUE
421	Thailand	13-Mae-eye #1 (Thaton sub-district)	65	31	2007-10-10	03	48	both	Individual	4.8	4.7	4.5	4.4	4.8	4.5	4.8	5	N/A	5	42.5	4.72	TRUE
420	Thailand	13-Mae-eye #1 (Thaton sub-district)	65	43	2007-10-10	02	45	both	Individual	4.7	4.4	4	4.2	4.3	4.8	4.3	N/A	N/A	4.5	35.2	4.4	TRUE
418	Thailand	13-Mae-eye #1 (Thaton sub-district)	65	09	2007-10-10	01	46	both	Individual	4.8	4.8	4.8	5	4.9	4.8	5	5	N/A	5	44.1	4.9	TRUE
419	Thailand	13-Mae-eye #1 (Thaton sub-district)	65	13	2007-10-10	01	45	both	Individual	4.7	4.9	4.9	4.9	4.9	5	5	5	5	5	49.3	4.93	TRUE
423	Thailand	13-Mae-eye #1 (Thaton sub-district)	66	04	2007-10-11	01	31	both	Individual	4.9	5	5	4.9	5	5	4.9	5	5	5	49.7	4.97	TRUE
424	Thailand	13-Mae-eye #1 (Thaton sub-district)	66	10	2007-10-11	02	52	both	Individual	4.8	4.7	4.5	4.4	4.6	4.8	4.4	N/A	N/A	4.5	36.7	4.59	TRUE
425	Thailand	13-Mae-eye #1 (Thaton sub-district)	66	09	2007-10-11	03	51	both	Individual	4.9	4.9	4.8	4.7	4.9	4.8	4.9	4.8	4.5	5	48.2	4.82	TRUE
429	Thailand	4-Chiangdao#2 (Pingkong sub-district)	15	42	2007-10-24	02	45	both	Individual	4.7	4.7	4.5	4.3	4.6	4.8	4.2	N/A	N/A	4.5	36.3	4.54	TRUE
427	Thailand	4-Chiangdao#2 (Pingkong sub-district)	15	46	2007-10-24	04	45	both	Individual	4.8	4.7	4.9	4.9	4.9	5	4.7	4.5	4.8	4.5	47.7	4.77	TRUE
428	Thailand	4-Chiangdao#2 (Pingkong sub-district)	15	64	2007-10-24	03	56	both	Individual	4.8	4.9	4.8	4.7	4.8	4.8	4.7	5	4.8	5	48.3	4.83	TRUE
426	Thailand	4-Chiangdao#2 (Pingkong sub-district)	15	65	2007-10-24	01	53	both	Individual	4.2	3.9	3.9	3.9	4	3.8	3.9	3.8	3.5	4	38.9	3.89	TRUE
430	Thailand	8-Chaiprakarn #2 (Maethalope sub-district)	31	68	2007-11-07	04	38	both	Individual	4.6	4.6	4	4.1	4.6	4.5	4.3	3.3	N/A	4.5	38.5	4.28	TRUE
431	Thailand	8-Chaiprakarn #2 (Maethalope sub-district)	31	40	2007-11-07	03	83	both	Individual	4.8	5	4.5	4.8	4.8	4.7	4.8	4.5	N/A	4.5	42.4	4.71	TRUE
432	Thailand	8-Chaiprakarn #2 (Maethalope sub-district)	31	44	2007-11-07	02	51	both	Individual	4.7	4.7	4.5	4	4.6	4.7	4.2	N/A	N/A	4.5	35.9	4.49	TRUE
433	Thailand	8-Chaiprakarn #2 (Maethalope sub-district)	31	31	2007-11-07	01	51	both	Individual	3.8	3.9	3.5	3.3	3.9	3.8	3.2	3.3	4	4	36.7	3.67	TRUE
434	Thailand	8-Chaiprakarn #2 (Maethalope sub-district)	34	13	2007-11-12	02	52	both	Individual	4.8	4.7	4.7	4.4	4.6	4.8	4.4	4.5	N/A	4.5	41.4	4.6	TRUE
435	Thailand	8-Chaiprakarn #2 (Maethalope sub-district)	31	64	2007-11-13	04	45	both	Individual	4.8	4.9	4.8	4.6	4.9	4.7	4.9	5	5	5	48.6	4.86	TRUE
436	Thailand	8-Chaiprakarn #2 (Maethalope sub-district)	32	65	2007-11-14	03	53	both	Individual	4.9	4.7	5	4.7	4.8	4.5	4.7	4.8	4.8	4.5	47.4	4.74	TRUE
437	Thailand	2-Maetang #2 (Banchang&Guidchang&In-hta-kin)	04	68	2007-11-19	15	53	both	Individual	4.3	4.4	4.4	4.3	4.7	4.2	4	4.3	4.7	4.4	43.7	4.37	TRUE
439	Thailand	2-Maetang #2 (Banchang&Guidchang&In-hta-kin)	04	64	2007-11-19	15	47	both	Individual	4.6	4.7	4	4.3	4.6	4.3	4	4.3	4.5	4.6	43.9	4.39	TRUE
438	Thailand	2-Maetang #2 (Banchang&Guidchang&In-hta-kin)	04	10	2007-11-19	03	53	both	Individual	4.9	4.7	5	4.6	5	4.7	4.7	5	3.7	5	47.3	4.73	TRUE
442	Thailand	2-Maetang #2 (Banchang&Guidchang&In-hta-kin)	07	09	2007-11-22	04	40	both	Individual	4.9	5	4.9	4.8	4.9	4.8	4.7	4.5	5	5	48.5	4.85	TRUE
446	Thailand	2-Maetang #2 (Banchang&Guidchang&In-hta-kin)	07	31	2007-11-22	29	43	both	Individual	3.6	3.7	3.8	3.5	3.7	3.8	4	3	N/A	4.3	33.4	3.71	TRUE
445	Thailand	2-Maetang #2 (Banchang&Guidchang&In-hta-kin)	07	04	2007-11-22	15	38	both	Individual	5	5	4.9	4.9	4.8	5	4.7	5	5	4.8	49.1	4.91	TRUE
444	Thailand	2-Maetang #2 (Banchang&Guidchang&In-hta-kin)	07	65	2007-11-22	02	44	both	Individual	4.8	4.6	4.6	4.2	4.5	4.7	4.6	4.3	4.7	4.5	45.5	4.55	TRUE
443	Thailand	2-Maetang #2 (Banchang&Guidchang&In-hta-kin)	07	44	2007-11-22	15	63	both	Individual	4.5	4.3	4.8	4.4	4.7	4.8	4.2	4.3	5	4.3	45.3	4.53	TRUE
440	Thailand	2-Maetang #2 (Banchang&Guidchang&In-hta-kin)	07	43	2007-11-22	29	32	pre-test	Individual	4.8	4.6	4.6	4.7	4.3	4.5	N/A	N/A	N/A	N/A	27.5	4.58	TRUE
441	Thailand	2-Maetang #2 (Banchang&Guidchang&In-hta-kin)	07	03	2007-11-22	29	40	pre-test	Individual	4.8	4.9	4.5	4.7	4.9	5	N/A	N/A	N/A	N/A	28.8	4.8	TRUE
449	Thailand	2-Maetang #2 (Banchang&Guidchang&In-hta-kin)	10	68	2007-11-27	14	40	both	Individual	4.5	4.9	4.2	4.5	4.6	4.3	4.3	4.3	4.3	4.2	44.1	4.41	TRUE
447	Thailand	2-Maetang #2 (Banchang&Guidchang&In-hta-kin)	10	13	2007-11-27	15	38	both	Individual	4.8	4.9	4.8	4.8	4.8	4.8	4.7	4.5	4.5	4.5	47.1	4.71	TRUE
448	Thailand	2-Maetang #2 (Banchang&Guidchang&In-hta-kin)	17	43	2007-11-27	03	47	both	Individual	4.9	4.6	4.8	4.7	4.5	4.5	4.4	3.8	4.8	5	46	4.6	TRUE
450	Thailand	2-Maetang #2 (Banchang&Guidchang&In-hta-kin)	08	31	2007-11-28	02	68	both	Individual	4.2	4.3	4.3	4	4.2	4.3	3.6	3.5	4.2	4.5	41.1	4.11	TRUE
452	Thailand	2-Maetang #2 (Banchang&Guidchang&In-hta-kin)	09	02	2007-11-29	01	40	both	Individual	5	4.9	4.9	5	4.9	4.8	4.9	5	5	5	49.4	4.94	TRUE
453	Thailand	2-Maetang #2 (Banchang&Guidchang&In-hta-kin)	09	34	2007-11-29	04	45	both	Individual	4.9	4.9	4.8	4.9	4.9	4.7	4.9	4	N/A	4.5	42.5	4.72	TRUE
454	Thailand	2-Maetang #2 (Banchang&Guidchang&In-hta-kin)	09	10	2007-11-29	15	73	both	Individual	4.7	4.7	4.6	4.6	4.8	5	4.3	4.5	4.7	4.5	46.4	4.64	TRUE
455	Thailand	2-Maetang #2 (Banchang&Guidchang&In-hta-kin)	09	32	2007-11-29	29	42	both	Individual	4.5	4.6	4.6	4.7	4.8	4.5	4.5	N/A	4.2	4	40.4	4.49	TRUE
451	Thailand	2-Maetang #2 (Banchang&Guidchang&In-hta-kin)	09	40	2007-11-29	01	70	both	Individual	4.7	4.7	4.6	4.8	4.5	4.6	4.4	3.4	N/A	4.5	40.2	4.47	TRUE
459	Thailand	2-Maetang #2 (Banchang&Guidchang&In-hta-kin)	02	44	2007-12-06	29	41	both	Individual	4.7	4.7	4.4	4.5	4.8	4.3	N/A	N/A	4.4	4.8	36.6	4.58	TRUE
456	Thailand	2-Maetang #2 (Banchang&Guidchang&In-hta-kin)	02	31	2007-12-06	15	71	both	Individual	4.6	4.7	5	4.4	4.2	4.7	4.2	4.3	4.7	4.3	45.1	4.51	TRUE
458	Thailand	2-Maetang #2 (Banchang&Guidchang&In-hta-kin)	02	64	2007-12-06	29	78	both	Individual	4.4	4.4	4.4	4.3	4.4	4.7	4.3	N/A	N/A	4.8	35.7	4.46	TRUE
457	Thailand	2-Maetang #2 (Banchang&Guidchang&In-hta-kin)	02	65	2007-12-06	15	70	both	Individual	4.8	4.7	4.4	4.2	4.3	4.8	4.4	4.5	4.7	4.4	45.2	4.52	TRUE
461	Thailand	2-Maetang #2 (Banchang&Guidchang&In-hta-kin)	06	09	2007-12-10	15	48	both	Individual	4.9	4.9	4.7	4.7	4.7	4.8	4.7	4.8	4.8	4.5	47.5	4.75	TRUE
460	Thailand	2-Maetang #2 (Banchang&Guidchang&In-hta-kin)	06	34	2007-12-10	15	36	both	Individual	4.8	4.6	4.7	4.8	4.6	4.8	4.4	4.3	4.2	4.5	45.7	4.57	TRUE
462	Thailand	2-Maetang #2 (Banchang&Guidchang&In-hta-kin)	05	44	2007-12-11	14	45	both	Individual	4.4	4.1	4.1	4	4.5	4	4.1	4	4.3	4.2	41.7	4.17	TRUE
463	Thailand	2-Maetang #2 (Banchang&Guidchang&In-hta-kin)	05	40	2007-12-11	14	80	both	Individual	4.2	4.7	3.5	4.1	4.1	4.7	3.9	4	4.2	4.1	41.5	4.15	TRUE
464	Thailand	2-Maetang #2 (Banchang&Guidchang&In-hta-kin)	05	10	2007-12-11	29	45	pre-test	Individual	4.9	4.7	4.8	4.8	4.8	4.5	N/A	N/A	N/A	N/A	28.5	4.75	TRUE
465	Thailand	2-Maetang #2 (Banchang&Guidchang&In-hta-kin)	05	68	2007-12-11	29	65	both	Individual	4.5	4.7	4.5	4	4.4	4.8	N/A	N/A	4.3	4	35.2	4.4	TRUE
466	Thailand	2-Maetang #2 (Banchang&Guidchang&In-hta-kin)	03	13	2007-12-19	29	32	both	Individual	4.6	4.4	4.5	4.6	4.8	4.8	N/A	N/A	4.8	5	37.5	4.69	TRUE
467	Thailand	2-Maetang #2 (Banchang&Guidchang&In-hta-kin)	09	32	2007-12-20	03	52	both	Individual	4.7	4.9	4.8	4.6	4.8	4.7	4.7	5	N/A	5	43.2	4.8	TRUE
468	Thailand	2-Maetang #2 (Banchang&Guidchang&In-hta-kin)	09	43	2007-12-20	01	50	both	Individual	4.7	4.6	4.4	4	4.2	4.4	4.4	3.4	N/A	4	38.1	4.23	TRUE
									AVG	4.6459	4.59344	4.52896	4.37432	4.59399	4.62155	4.39353	4.34516	4.53776	4.54972	43.0689	4.52137

## Sheet: Thai VCT Y-3
Entry Order	Site	Community Name	Venue	Counselor ID	Date of Evaluation	Evaluator	Session Length	Pre Test or Post Test	Individual or Couple	A - Basic Skills	B - Introduction	C - Risk Assessment	D - Reducing Risk	E - Test Preparation	F - Giving Result	G - Risk Reduction	H - RR Plan	I - Disclosure	J - Support	GRAND TOTAL	GRAND AVERAGE	Narrative Comments
469	Thailand	4-Chiangdao#2 (Pingkong sub-district)	16	64	2008-01-15	14	55	both	Individual	4.2	4.3	4	3.8	4.3	4.7	4.1	4	4.8	4.2	42.4	4.24	TRUE
473	Thailand	4-Chiangdao#2 (Pingkong sub-district)	18	03	2008-01-22	15	50	both	Individual	4.8	4.9	4.8	4.9	4.8	5	4.4	4.8	4.7	4.8	47.9	4.79	TRUE
474	Thailand	4-Chiangdao#2 (Pingkong sub-district)	18	02	2008-01-22	29	35	pre-test	Individual	4.8	4.7	4.7	4.7	4.7	N/A	N/A	N/A	N/A	N/A	23.6	4.72	TRUE
472	Thailand	4-Chiangdao#2 (Pingkong sub-district)	18	44	2008-01-22	15	37	both	Individual	4.8	5	4.8	4.8	4.8	4.8	4.3	4.5	4.7	4.4	46.9	4.69	TRUE
471	Thailand	4-Chiangdao#2 (Pingkong sub-district)	18	31	2008-01-22	14	50	both	Individual	4.2	4.4	3.8	4	4.3	4.2	4.3	4.5	4.5	4.2	42.4	4.24	TRUE
470	Thailand	4-Chiangdao#2 (Pingkong sub-district)	18	65	2008-01-22	14	41	both	Individual	4.9	4.7	4.2	4.8	4.6	4.7	4.4	4.5	4.5	4.5	45.8	4.58	TRUE
475	Thailand	4-Chiangdao#2 (Pingkong sub-district)	18	34	2008-01-22	29	37	both	Individual	4.7	4.3	5	4.7	4.7	4.8	N/A	N/A	N/A	4.3	32.5	4.64	TRUE
477	Thailand	4-Chiangdao#2 (Pingkong sub-district)	14	40	2008-01-29	02	47	both	Individual	4.8	4.6	4.6	4.3	4.6	4.5	4.2	3.3	4	4.5	43.4	4.34	TRUE
476	Thailand	4-Chiangdao#2 (Pingkong sub-district)	14	68	2008-01-29	03	42	both	Individual	4.9	4.7	4.7	4.4	4.8	4.7	4.3	4.3	4.3	5	46.1	4.61	TRUE
479	Thailand	6-Praow #2 (Sunsai&Banpong sub-district)	21	40	2008-02-06	29	60	both	Individual	4.8	4.7	4.3	4.3	4.8	4.7	4.3	3.8	3.7	4.5	43.9	4.39	TRUE
478	Thailand	6-Praow #2 (Sunsai&Banpong sub-district)	21	32	2008-02-06	29	42	both	Individual	4.8	4.6	4.7	4.3	4.6	4.8	3.2	3	4.8	4.5	43.3	4.33	TRUE
482	Thailand	6-Praow #2 (Sunsai&Banpong sub-district)	22	68	2008-02-11	29	41	pre-test	Individual	4.8	4.7	4.8	4	4.6	N/A	N/A	N/A	N/A	N/A	22.9	4.58	FALSE
481	Thailand	6-Praow #2 (Sunsai&Banpong sub-district)	22	13	2008-02-11	29	34	both	Individual	4.8	4.7	4.6	4.4	4.7	5	4.8	4.8	4.5	5	47.3	4.73	TRUE
480	Thailand	6-Praow #2 (Sunsai&Banpong sub-district)	22	44	2008-02-11	29	37	both	Individual	4.9	4.7	5	4.7	4.8	5	N/A	N/A	5	5	39.1	4.89	TRUE
485	Thailand	6-Praow #2 (Sunsai&Banpong sub-district)	29	65	2008-02-12	15	47	both	Individual	4.4	4.6	4.4	4.6	4.3	4.5	4	4.5	4.5	4.3	44.1	4.41	TRUE
484	Thailand	6-Praow #2 (Sunsai&Banpong sub-district)	29	64	2008-02-12	15	59	both	Individual	4.5	4.6	4.6	4.3	4.7	4.8	4.1	4	4.7	4.3	44.6	4.46	TRUE
483	Thailand	6-Praow #2 (Sunsai&Banpong sub-district)	29	43	2008-02-12	14	55	both	Individual	4.4	4.4	3.9	3.9	4.3	4.2	4.1	4	4.8	4.3	42.3	4.23	TRUE
486	Thailand	6-Praow #2 (Sunsai&Banpong sub-district)	23	31	2008-02-18	01	56	both	Individual	4.5	4.4	4.1	3.8	4	4.5	4.3	4	4.3	4.5	42.4	4.24	TRUE
487	Thailand	6-Praow #2 (Sunsai&Banpong sub-district)	24	68	2008-02-19	04	35	both	Individual	4.8	4.6	4.9	4.7	4.9	4.5	4.6	4.3	5	5	47.3	4.73	TRUE
488	Thailand	2-Maetang #2 (Banchang&Guidchang&In-hta-kin)	09	64	2008-02-20	02	55	both	Individual	4.8	4.6	4.6	4.1	4.4	4.8	4.1	N/A	N/A	4.5	35.9	4.49	TRUE
489	Thailand	6-Praow #2 (Sunsai&Banpong sub-district)	29	65	2008-02-21	03	40	both	Individual	4.8	4.9	4.6	4.3	4.4	4.7	4.6	5	4.8	5	47.1	4.71	TRUE
490	Thailand	6-Praow #2 (Sunsai&Banpong sub-district)	21	34	2008-02-25	02	53	both	Individual	4.8	4.4	4.1	4.2	4.8	4.8	4.4	N/A	5	5	41.5	4.61	TRUE
491	Thailand	6-Praow #2 (Sunsai&Banpong sub-district)	21	44	2008-02-25	01	54	both	Individual	4.8	4.6	4.6	4.1	4.9	4.3	4.3	3.5	4.6	4.8	44.5	4.45	TRUE
492	Thailand	6-Praow #2 (Sunsai&Banpong sub-district)	21	04	2008-02-25	29	42	both	Individual	4.9	4.6	5	4.7	4.8	4.8	N/A	N/A	4.5	5	38.3	4.79	TRUE
493	Thailand	6-Praow #2 (Sunsai&Banpong sub-district)	21	64	2008-02-25	29	62	both	Individual	4.7	4.7	4.4	4.6	4.5	4.7	3.9	N/A	4.7	5	41.2	4.58	TRUE
495	Thailand	6-Praow #2 (Sunsai&Banpong sub-district)	30	03	2008-02-26	14	50	both	Individual	4.9	4.7	5	4.9	5	4.8	4.8	4.8	4.8	5	48.7	4.87	TRUE
497	Thailand	6-Praow #2 (Sunsai&Banpong sub-district)	30	10	2008-02-26	15	55	both	Individual	5	4.9	5	4.9	4.8	5	4.7	5	4.8	5	49.1	4.91	TRUE
496	Thailand	6-Praow #2 (Sunsai&Banpong sub-district)	30	02	2008-02-26	26	44	both	Individual	5	4.9	4.9	4.8	5	5	4.7	4.8	4.8	5	48.9	4.89	TRUE
494	Thailand	6-Praow #2 (Sunsai&Banpong sub-district)	30	09	2008-02-26	14	62	both	Individual	4.8	4.7	4.6	4.3	4.7	5	4.7	4.8	4.8	4.8	47.2	4.72	TRUE
498	Thailand	6-Praow #2 (Sunsai&Banpong sub-district)	30	65	2008-02-27	04	40	both	Individual	4.7	4.7	4.5	4.7	4.8	4.5	4.4	5	5	5	47.3	4.73	TRUE
499	Thailand	4-Chiangdao#2 (Pingkong sub-district)	18	68	2008-02-28	03	49	both	Individual	4.8	4.6	4.8	4.3	4.8	4.5	4.6	4.8	4.5	5	46.7	4.67	TRUE
501	Thailand	12-Fang #4 (Monpin sub-district)	62	03	2008-03-04	29	49	both	Individual	4.9	4.9	4.8	4.8	4.8	5	4.7	4.5	5	4.5	47.9	4.79	TRUE
500	Thailand	12-Fang #4 (Monpin sub-district)	62	31	2008-03-04	29	56	both	Individual	4.9	4.9	4.6	5	4.8	5	N/A	N/A	4.3	4.8	38.3	4.79	TRUE
502	Thailand	12-Fang #4 (Monpin sub-district)	57	44	2008-03-06	03	30	both	Individual	4.8	4.7	4.7	4.6	4.7	4.7	4.3	4.3	4.7	5	46.5	4.65	TRUE
504	Thailand	12-Fang #4 (Monpin sub-district)	54	34	2008-03-11	14	45	both	Individual	4.8	4.7	4.7	4.6	4.7	5	4.4	4.5	4.3	5	46.7	4.67	TRUE
505	Thailand	12-Fang #4 (Monpin sub-district)	54	10	2008-03-11	29	57	both	Individual	4.6	4.7	4.8	4.7	4.6	5	N/A	N/A	4.8	4.5	37.7	4.71	TRUE
503	Thailand	12-Fang #4 (Monpin sub-district)	54	13	2008-03-11	14	35	both	Individual	4.6	4.4	4.3	4.7	4.5	4.8	4.6	4.8	4.5	4.8	46	4.6	TRUE
506	Thailand	12-Fang #4 (Monpin sub-district)	54	02	2008-03-11	29	45	both	Individual	4.8	4.7	4.8	4.2	4.8	4.8	4.8	N/A	4.8	5	42.7	4.74	TRUE
507	Thailand	12-Fang #4 (Monpin sub-district)	58	65	2008-03-12	01	38	pre-test	Individual	4.4	4.6	4.1	3.8	4	N/A	N/A	N/A	N/A	N/A	20.9	4.18	TRUE
508	Thailand	12-Fang #4 (Monpin sub-district)	58	40	2008-03-12	04	53	both	Individual	4.7	4.9	4.9	4.4	4.9	4.7	4.9	4.3	4.7	5	47.4	4.74	TRUE
510	Thailand	12-Fang #4 (Monpin sub-district)	61	32	2008-03-13	02	38	both	Individual	4.9	4.7	4.8	4.3	4.8	4.7	4.4	N/A	4.7	5	42.3	4.7	TRUE
509	Thailand	12-Fang #4 (Monpin sub-district)	61	64	2008-03-13	03	59	both	Individual	4.8	4.7	4.6	4.8	4.9	4.8	4.8	5	4.8	5	48.2	4.82	TRUE
511	Thailand	12-Fang #4 (Monpin sub-district)	62	40	2008-03-18	29	50	both	Individual	4.6	4.4	4.3	4.3	4.3	4.8	4.3	4.5	4.2	5	44.7	4.47	TRUE
512	Thailand	12-Fang #4 (Monpin sub-district)	62	64	2008-03-18	29	64	both	Individual	4.5	4.6	4.3	4	4.4	4.8	4.3	N/A	3.5	5	39.4	4.38	TRUE
513	Thailand	12-Fang #4 (Monpin sub-district)	59	65	2008-03-19	01	55	both	Individual	4.5	4.4	4.1	3.9	4	4.2	4.2	4.4	4.4	4.8	42.9	4.29	TRUE
514	Thailand	12-Fang #4 (Monpin sub-district)	59	31	2008-03-19	04	45	pre-test	Individual	4.8	4.7	4.9	4.6	5	N/A	N/A	N/A	N/A	N/A	24	4.8	TRUE
515	Thailand	12-Fang #4 (Monpin sub-district)	59	09	2008-03-19	02	38	both	Individual	4.8	4.7	4.8	4.7	4.8	4.8	4.6	N/A	4.8	5	43	4.78	TRUE
516	Thailand	12-Fang #4 (Monpin sub-district)	59	43	2008-03-20	03	73	both	Individual	4.7	4.6	4.7	4.3	4.5	4.5	4.7	5	4.7	4.5	46.2	4.62	TRUE
517	Thailand	12-Fang #4 (Monpin sub-district)	55	04	2008-03-24	15	45	both	Individual	4.8	5	4.7	4.8	4.8	5	4.6	4.5	5	5	48.2	4.82	FALSE
518	Thailand	12-Fang #4 (Monpin sub-district)	55	44	2008-03-24	15	31	both	Individual	4.8	4.7	4.9	4.6	4.8	4.8	4.6	4.5	4.8	5	47.5	4.75	TRUE
521	Thailand	12-Fang #4 (Monpin sub-district)	51	31	2008-03-25	15	38	both	Individual	4.4	4.7	4.7	4.6	4.8	4.7	4.7	4.5	5	4.7	46.8	4.68	TRUE
519	Thailand	12-Fang #4 (Monpin sub-district)	51	34	2008-03-25	29	49	both	Individual	4.7	4.6	4.6	4.3	4.8	4.8	4.6	N/A	4.8	4.5	41.7	4.63	TRUE
520	Thailand	12-Fang #4 (Monpin sub-district)	51	43	2008-03-25	29	69	both	Individual	4.7	4.1	4.6	4	4.4	4.8	N/A	N/A	4.7	4.5	35.8	4.48	TRUE
522	Thailand	12-Fang #4 (Monpin sub-district)	51	64	2008-03-25	15	57	both	Individual	4.6	4.7	4.4	4.4	4.6	4.7	4.4	4	5	4	44.8	4.48	TRUE
524	Thailand	12-Fang #4 (Monpin sub-district)	52	32	2008-03-27	03	45	both	Individual	4.9	4.9	4.8	4.7	4.7	4.8	4.4	4.3	4.5	5	47	4.7	TRUE
523	Thailand	12-Fang #4 (Monpin sub-district)	52	40	2008-03-27	02	52	both	Individual	4.8	4.7	4.5	4	4.6	4.7	4.7	4.5	4.3	4.5	45.3	4.53	TRUE
525	Thailand	12-Fang #4 (Monpin sub-district)	52	13	2008-03-27	01	40	both	Individual	4.2	4.6	4.3	4.7	4.5	4.2	4.1	4	3.9	4.5	43	4.3	TRUE
529	Thailand	12-Fang #4 (Monpin sub-district)	54	43	2008-04-08	29	44	both	Individual	4.8	4.6	5	4.7	4.5	4.4	N/A	N/A	N/A	4.5	32.5	4.64	TRUE
527	Thailand	12-Fang #4 (Monpin sub-district)	54	64	2008-04-08	14	77	both	Individual	4.6	4.9	4.4	4.1	4.3	5	4.6	4	4.7	5	45.6	4.56	TRUE
528	Thailand	12-Fang #4 (Monpin sub-district)	54	38	2008-04-08	29	35	both	Individual	4.7	4.7	4.6	4	4.7	4.4	N/A	N/A	5	4.5	36.6	4.58	TRUE
526	Thailand	12-Fang #4 (Monpin sub-district)	54	65	2008-04-08	14	51	both	Individual	4.5	4.6	4	4.4	4.7	4.7	4.6	4.5	4.6	5	45.6	4.56	TRUE
531	Thailand	13-Mae-eye #1 (Thaton sub-district)	72	31	2008-04-29	03	107	both	Individual	4.8	4.9	4.8	4.8	4.9	4.8	4.7	5	5	4.5	48.2	4.82	TRUE
530	Thailand	13-Mae-eye #1 (Thaton sub-district)	72	38	2008-04-29	01	51	both	Individual	4.6	4.6	4.2	4.1	3.9	4.5	4.1	4.3	4.5	4.5	43.3	4.33	TRUE
532	Thailand	13-Mae-eye #1 (Thaton sub-district)	64	44	2008-04-30	15	35	both	Individual	4.6	4.7	4.7	4.4	4.8	4.7	4.1	4.3	4.2	4	44.5	4.45	TRUE
533	Thailand	13-Mae-eye #1 (Thaton sub-district)	64	40	2008-04-30	15	49	both	Individual	4.7	4.9	4.7	4.3	4.8	4.8	4.4	4.3	4	4.3	45.2	4.52	TRUE
534	Thailand	13-Mae-eye #1 (Thaton sub-district)	64	34	2008-04-30	02	42	pre-test	Individual	4.8	4.9	4.8	4.4	4.8	N/A	N/A	N/A	N/A	N/A	23.7	4.74	TRUE
535	Thailand	13-Mae-eye #1 (Thaton sub-district)	64	32	2008-04-30	04	42	both	Individual	4.7	4.7	4.5	4.6	4.9	4.7	4.4	4	4.8	5	46.3	4.63	TRUE
536	Thailand	13-Mae-eye #1 (Thaton sub-district)	64	65	2008-04-30	01	47	both	Individual	4.5	4.6	4	3.7	4.3	4.3	4.2	4	4.5	3.9	42	4.2	TRUE
537	Thailand	12-Fang #4 (Monpin sub-district)	72	13	2008-05-06	29	44	both	Individual	4.7	4.7	4.8	4.6	4.6	4.8	4.4	4	4.3	4.5	45.4	4.54	TRUE
538	Thailand	13-Mae-eye #1 (Thaton sub-district)	72	65	2008-05-06	29	55	both	Individual	4.6	4.6	4.5	4.4	4.6	4.5	4.3	3	4	4.5	43	4.3	TRUE
539	Thailand	9-Fang #1(MaeKha sub-district)	40	10	2008-05-12	29	59	both	Individual	4.8	4.7	4.6	4.5	4.8	5	N/A	N/A	4.8	4.8	38	4.75	TRUE
540	Thailand	9-Fang #1(MaeKha sub-district)	40	64	2008-05-12	29	52	both	Individual	4.5	4.9	4.7	4.3	4.6	5	N/A	N/A	4.5	4	36.5	4.56	TRUE
542	Thailand	9-Fang #1(MaeKha sub-district)	48	31	2008-05-13	29	59	both	Individual	4.7	4.7	4.7	4.4	4.8	4.8	4.7	N/A	4.8	4.5	42.1	4.68	TRUE
541	Thailand	9-Fang #1(MaeKha sub-district)	48	03	2008-05-13	29	45	both	Individual	4.9	4.9	4.9	4.7	4.9	4.8	N/A	N/A	4.7	5	38.8	4.85	FALSE
543	Thailand	9-Fang #1(MaeKha sub-district)	49	38	2008-05-14	03	50	both	Individual	4.8	4.4	4.5	4.4	4.6	4.5	4.7	5	4.5	4.5	45.9	4.59	TRUE
544	Thailand	9-Fang #1(MaeKha sub-district)	49	32	2008-05-14	02	42	both	Individual	4.9	4.9	4.8	4.3	4.8	4.7	4.7	N/A	N/A	5	38.1	4.76	TRUE
545	Thailand	9-Fang #1(MaeKha sub-district)	49	65	2008-05-14	04	50	both	Individual	4.8	4.9	5	4.4	4.9	4.5	4.8	4.8	5	4.5	47.6	4.76	TRUE
551	Thailand	9-Fang #1(MaeKha sub-district)	46	65	2008-05-20	15	50	both	Individual	4.6	4.6	4.7	4.4	4.6	4.5	4.3	4.3	4.7	4.3	45	4.5	TRUE
546	Thailand	9-Fang #1(MaeKha sub-district)	46	04	2008-05-20	29	40	both	Individual	4.9	4.7	5	4.8	4.8	4.8	4.7	N/A	4.8	5	43.5	4.83	TRUE
550	Thailand	9-Fang #1(MaeKha sub-district)	46	43	2008-05-20	15	43	both	Individual	4.6	4.6	4.4	4.3	4.4	4.3	4.3	4.3	4.5	4.7	44.4	4.44	TRUE
547	Thailand	9-Fang #1(MaeKha sub-district)	46	02	2008-05-20	29	43	both	Individual	4.9	4.9	4.9	4.9	4.9	4.8	4.7	N/A	4.7	5	43.7	4.86	TRUE
549	Thailand	9-Fang #1(MaeKha sub-district)	46	40	2008-05-20	14	55	both	Individual	4.6	4.7	4.3	4	4.7	4.8	4.4	4	4.8	4.5	44.8	4.48	TRUE
548	Thailand	9-Fang #1(MaeKha sub-district)	46	38	2008-05-20	14	60	both	Individual	4.7	4.6	4.1	4.2	4.8	4.7	4.4	4.3	4.4	4.5	44.7	4.47	TRUE
552	Thailand	9-Fang #1(MaeKha sub-district)	43	10	2008-05-29	15	45	both	Individual	5	4.7	4.9	4.5	4.8	5	4.4	4.5	4.4	4.5	46.7	4.67	TRUE
553	Thailand	9-Fang #1(MaeKha sub-district)	43	64	2008-05-29	64	53	both	Individual	4.4	4.6	4.3	4.1	4.7	4.5	4.1	4.3	4.3	4.2	43.5	4.35	TRUE
554	Thailand	9-Fang #1(MaeKha sub-district)	43	38	2008-05-29	29	55	both	Individual	4.7	4.3	4.5	4.3	4.3	4.2	N/A	N/A	4.5	4.5	35.3	4.41	TRUE
555	Thailand	9-Fang #1(MaeKha sub-district)	43	32	2008-05-29	29	40	both	Individual	4.8	4.7	4.4	4.7	4.8	4.5	N/A	N/A	4.8	5	37.7	4.71	TRUE
559	Thailand	9-Fang #1(MaeKha sub-district)	46	38	2008-06-03	15	58	both	Individual	4.6	4.6	4.7	4.4	4.6	4.8	4.3	4.8	4.6	4.3	45.7	4.57	TRUE
557	Thailand	9-Fang #1(MaeKha sub-district)	46	64	2008-06-03	29	54	both	Individual	4.7	4.3	4.7	4.7	4.5	4.7	4.6	N/A	4.8	4.5	41.5	4.61	TRUE
558	Thailand	9-Fang #1(MaeKha sub-district)	46	13	2008-06-03	15	48	both	Individual	4.7	4.7	4.7	4.8	4.7	4.9	4.4	4.8	5	4.7	47.4	4.74	TRUE
556	Thailand	9-Fang #1(MaeKha sub-district)	46	65	2008-06-03	29	53	both	Individual	4.6	4.4	4.6	4.4	4.7	4.7	4.2	4	4	4.3	43.9	4.39	TRUE
561	Thailand	8-Chaiprakarn #2 (Maethalope sub-district)	34	37	2008-06-24	15	52	both	Individual	4.6	4.4	4.7	4.6	4.7	4.8	4.2	4.3	4.5	4.3	45.1	4.51	TRUE
562	Thailand	8-Chaiprakarn #2 (Maethalope sub-district)	34	34	2008-06-24	01	40	both	Individual	4.5	4.6	4.4	4.4	4.9	4.3	4.2	4	4.9	5	45.2	4.52	TRUE
560	Thailand	8-Chaiprakarn #2 (Maethalope sub-district)	34	36	2008-06-24	15	26	both	Individual	4.5	4.3	4.8	4.6	4.3	4.4	4.3	4	4.7	4	43.9	4.39	TRUE
563	Thailand	8-Chaiprakarn #2 (Maethalope sub-district)	34	44	2008-06-24	01	55	both	Individual	4.7	4.7	4.4	4.4	4.7	4.6	4.3	4	4.5	5	45.3	4.53	TRUE
567	Thailand	8-Chaiprakarn #2 (Maethalope sub-district)	31	44	2008-06-25	15	38	both	Individual	4.7	4.7	4.4	4.6	4.8	4.8	4.6	4.8	4.8	4.3	46.5	4.65	TRUE
564	Thailand	8-Chaiprakarn #2 (Maethalope sub-district)	31	44	2008-06-25	29	49	both	Individual	4.6	4.4	4.3	4.6	4	4.7	4.4	N/A	4.7	4	39.7	4.41	TRUE
565	Thailand	8-Chaiprakarn #2 (Maethalope sub-district)	31	41	2008-06-25	29	52	pre-test	Individual	4.8	4.7	4.8	4.7	4.6					4.3	27.9	4.65	TRUE
566	Thailand	8-Chaiprakarn #2 (Maethalope sub-district)	31	40	2008-06-25	15	58	both	Individual	4.9	4.7	4.9	4.6	4.8	4.7	4.4	4.5	4.3	4	45.8	4.58	TRUE
569	Thailand	8-Chaiprakarn #2 (Maethalope sub-district)	32	45	2008-06-26	15	50	both	Individual	4.7	4.7	4.7	4.7	4.8	5	4.4	4.5	4.8	4.7	47	4.7	TRUE
570	Thailand	8-Chaiprakarn #2 (Maethalope sub-district)	32	35	2008-06-26	14	67	both	Individual	4.8	4.9	3.8	4.3	4.7	4.3	4.6	4.8	4.7	4	44.9	4.49	TRUE
568	Thailand	8-Chaiprakarn #2 (Maethalope sub-district)	32	33	2008-06-26	15	58	both	Individual	4.8	4.7	4.6	4.6	4.8	4.8	4.4	4.8	4.8	4.7	47	4.7	TRUE
571	Thailand	8-Chaiprakarn #2 (Maethalope sub-district)	32	39	2008-06-26	14	45	both	Individual	4.5	4.6	4.6	4.1	4.6	4.8	4.7	4.5	4.4	4.5	45.3	4.53	TRUE
576	Thailand	8-Chaiprakarn #2 (Maethalope sub-district)	31	42	2008-07-06	04	55	both	Individual	4.7	4.6	4	4.6	4.8	4.5	4.4	4	4.8	4.5	44.9	4.49	TRUE
577	Thailand	8-Chaiprakarn #2 (Maethalope sub-district)	31	43	2008-07-06	03	45	both	Individual	4.8	4.7	4.6	4.4	4.6	4.5	4.4	5	5	5	47	4.7	TRUE
575	Thailand	8-Chaiprakarn #2 (Maethalope sub-district)	31	31	2008-07-06	02	45	both	Individual	4.8	4.9	4.8	4.2	4.8	4.8	4.2	N/A	5	5	42.5	4.72	TRUE
574	Thailand	8-Chaiprakarn #2 (Maethalope sub-district)	31	64	2008-07-06	03	60	both	Individual	4.7	4.9	4.7	4.6	4.7	4.8	4.8	5	4.8	5	48	4.8	TRUE
573	Thailand	8-Chaiprakarn #2 (Maethalope sub-district)	31	40	2008-07-06	02	65	both	Individual	4.7	4.7	4.7	4.1	4.6	4.8	4.1	3	4	5	43.7	4.37	TRUE
572	Thailand	8-Chaiprakarn #2 (Maethalope sub-district)	31	38	2008-07-06	04	48	both	Individual	4.8	4.6	4.9	4.7	4.8	4.7	4.9	5	4.7	5	48.1	4.81	TRUE
579	Thailand	2-Maetang #2 (Banchang&Guidchang&In-hta-kin)	07	03	2008-07-15	15	40	both	Individual	4.8	4.9	4.8	4.8	4.8	5	4.6	4.5	4.7	4.6	47.5	4.75	TRUE
581	Thailand	2-Maetang #2 (Banchang&Guidchang&In-hta-kin)	07	64	2008-07-15	29	48	both	Individual	4.6	4.4	4.5	3.7	4.7	4.7	N/A	N/A	4.3	4.5	35.4	4.43	TRUE
580	Thailand	2-Maetang #2 (Banchang&Guidchang&In-hta-kin)	07	02	2008-07-15	14	35	both	Individual	4.9	4.9	4.7	4.8	4.9	5	4.7	5	4.8	5	48.7	4.87	TRUE
578	Thailand	2-Maetang #2 (Banchang&Guidchang&In-hta-kin)	07	04	2008-07-15	15	40	both	Individual	4.8	4.9	5	4.7	4.9	5	4.6	4.5	4.7	4.6	47.7	4.77	TRUE
583	Thailand	2-Maetang #2 (Banchang&Guidchang&In-hta-kin)	09	38	2008-07-16	15	35	both	Individual	4.6	4.7	4.8	4.6	4.8	4.7	4.4	4.5	4.5	4.4	46	4.6	TRUE
582	Thailand	2-Maetang #2 (Banchang&Guidchang&In-hta-kin)	09	31	2008-07-16	15	50	both	Individual	4.7	4.6	4.7	4.4	4.8	4.8	4.3	4.5	4.5	4.5	45.8	4.58	TRUE
587	Thailand	2-Maetang #2 (Banchang&Guidchang&In-hta-kin)	01	13	2008-07-21	15	30	both	Individual	4.9	5	4.9	4.9	4.9	5	4.7	5	5	5	49.3	4.93	TRUE
586	Thailand	2-Maetang #2 (Banchang&Guidchang&In-hta-kin)	01	10	2008-07-21	15	35	both	Individual	4.8	4.9	4.8	4.7	4.8	5	4.4	4.8	4.7	4.8	47.7	4.77	TRUE
584	Thailand	2-Maetang #2 (Banchang&Guidchang&In-hta-kin)	09	43	2008-07-21	29	50	both	Individual	4.8	4.7	4.4	4	4.6	4.4	N/A	N/A	5	4	35.9	4.49	TRUE
585	Thailand	2-Maetang #2 (Banchang&Guidchang&In-hta-kin)	09	65	2008-07-21	29	53	both	Individual	4.8	4.9	4.5	5	4.8	5	N/A	N/A	4.8	4.5	38.3	4.79	TRUE
589	Thailand	2-Maetang #2 (Banchang&Guidchang&In-hta-kin)	06	34	2008-07-23	15	42	both	Individual	4.8	4.6	4.4	4.7	4.8	4.5	4.3	4.3	4	4.3	44.7	4.47	TRUE
588	Thailand	2-Maetang #2 (Banchang&Guidchang&In-hta-kin)	06	44	2008-07-23	15	27	both	Individual	4.8	5	4.4	4.5	4.4	4.8	4.3	4.5	4.2	4.4	45.3	4.53	TRUE
591	Thailand	2-Maetang #2 (Banchang&Guidchang&In-hta-kin)	05	40	2008-07-28	15	45	both	Individual	4.8	4.7	4.7	4.7	4.8	4.8	4.9	4.5	4.5	4.3	46.7	4.67	TRUE
590	Thailand	2-Maetang #2 (Banchang&Guidchang&In-hta-kin)	05	46	2008-07-28	15	44	both	Individual	4.5	4.9	4.4	4.4	4.6	4.5	4.2	4	4.2	4	43.7	4.37	TRUE
593	Thailand	2-Maetang #2 (Banchang&Guidchang&In-hta-kin)	05	65	2008-07-29	15	40	both	Individual	4.8	4.4	4.8	4.8	4.7	4.8	4.6	4.5	4.3	4.4	46.1	4.61	TRUE
592	Thailand	2-Maetang #2 (Banchang&Guidchang&In-hta-kin)	05	42	2008-07-29	15	52	both	Individual	4.8	4.6	4.8	4.6	4.8	4.7	4.6	4.3	4.7	4.2	46.1	4.61	TRUE
595	Thailand	2-Maetang #2 (Banchang&Guidchang&In-hta-kin)	09	36	2008-07-31	29	42	both	Individual	4.7	4.1	4.4	4.6	4.5	4.8	4.6	N/A	4.8	4.5	41	4.56	TRUE
596	Thailand	2-Maetang #2 (Banchang&Guidchang&In-hta-kin)	09	35	2008-07-31	15	38	both	Individual	4.9	4.9	5	4.6	4.8	5	4.7	4.8	5	4.4	48.1	4.81	TRUE
597	Thailand	2-Maetang #2 (Banchang&Guidchang&In-hta-kin)	09	39	2008-07-31	15	41	both	Individual	4.8	4.9	5	4.9	4.8	4.2	4	4.5	4.3	4.4	45.8	4.58	TRUE
594	Thailand	2-Maetang #2 (Banchang&Guidchang&In-hta-kin)	09	33	2008-07-31	29	47	both	Individual	4.8	4.6	4.6	4.7	4.9	4.8	5	N/A	4.4	4.5	42.3	4.7	TRUE
601	Thailand	2-Maetang #2 (Banchang&Guidchang&In-hta-kin)	02	41	2008-08-05	14	40	both	Individual	4.6	4.7	4.4	4.7	4.5	4.7	4.6	4.5	4.7	4.8	46.2	4.62	TRUE
600	Thailand	2-Maetang #2 (Banchang&Guidchang&In-hta-kin)	02	37	2008-08-05	14	60	both	Individual	4.7	4.7	4.4	4.4	4.1	4.7	4.6	4.5	4.4	4.7	45.2	4.52	TRUE
599	Thailand	2-Maetang #2 (Banchang&Guidchang&In-hta-kin)	02	42	2008-08-05	29	66	both	Individual	4.7	4.6	4.6	4.6	4.7	4.7	N/A	N/A	4	4	35.9	4.49	TRUE
598	Thailand	2-Maetang #2 (Banchang&Guidchang&In-hta-kin)	02	45	2008-08-05	29	45	both	Individual	4.8	4.7	4.8	4.3	4.6	4.8	N/A	N/A	4.7	4.5	37.2	4.65	TRUE
603	Thailand	2-Maetang #2 (Banchang&Guidchang&In-hta-kin)	04	36	2008-08-06	15	25	both	Individual	4.6	4.7	4.6	4.1	4.5	4.8	4.6	4	4.8	4.3	45	4.5	TRUE
602	Thailand	2-Maetang #2 (Banchang&Guidchang&In-hta-kin)	04	32	2008-08-06	15	45	both	Individual	4.7	4.6	4.7	4	4.7	4.7	4.4	4	4.7	4.3	44.8	4.48	FALSE
606	Thailand	4-Chiangdao#2 (Pingkong sub-district)	17	03	2008-08-19	29	48	both	Individual	4.9	4.9	4.9	4.6	4.8	4.8	4.7	4.8	4.8	4.5	47.7	4.77	TRUE
604	Thailand	4-Chiangdao#2 (Pingkong sub-district)	17	43	2008-08-19	15	40	both	Individual	4.6	4.4	4.7	4.6	4.8	4.7	4.1	4.3	4.8	4.3	45.3	4.53	TRUE
607	Thailand	4-Chiangdao#2 (Pingkong sub-district)	17	31	2008-08-19	29	70	both	Individual	4.6	4.7	4.7	4.5	4.7	5	4.4	N/A	4.8	4.5	41.9	4.66	TRUE
605	Thailand	4-Chiangdao#2 (Pingkong sub-district)	17	02	2008-08-19	15	30	both	Individual	4.9	4.9	4.8	4.9	4.8	5	4.7	4.8	4.8	4.7	48.3	4.83	TRUE
608	Thailand	4-Chiangdao#2 (Pingkong sub-district)	16	38	2008-08-20	03	36	both	Individual	4.7	4.3	4.5	4.4	4.5	4.3	4.6	4.8	4.2	4.5	44.8	4.48	TRUE
609	Thailand	4-Chiangdao#2 (Pingkong sub-district)	16	65	2008-08-20	04	40	both	Individual	4.7	4.9	4.6	4.7	4.8	4.3	4.4	4.3	4.8	4.5	46	4.6	TRUE
611	Thailand	4-Chiangdao#2 (Pingkong sub-district)	16	33	2008-08-21	04	40	both	Individual	4.7	4.7	4.8	4.4	4.9	4.7	4.7	4.3	4.7	5	46.9	4.69	TRUE
610	Thailand	4-Chiangdao#2 (Pingkong sub-district)	16	64	2008-08-21	02	43	both	Individual	4.8	4.7	4.8	3.6	4.5	4.7	4	N/A	3.8	4.5	39.4	4.38	TRUE
612	Thailand	4-Chiangdao#2 (Pingkong sub-district)	11	10	2008-08-24	03	32	both	Individual	4.8	4.7	4.6	4.6	4.8	4.5	4.8	4.8	4.3	4.5	46.4	4.64	TRUE
613	Thailand	4-Chiangdao#2 (Pingkong sub-district)	18	34	2008-08-25	03	38	both	Individual	4.8	4.6	4.9	4.2	4.5	4.7	4.2	4.3	4.3	5	45.5	4.55	TRUE
614	Thailand	4-Chiangdao#2 (Pingkong sub-district)	18	13	2008-08-25	02	37	both	Individual	4.8	4.7	4.7	4.7	4.6	4.7	4.7	N/A	4.8	4.7	42.4	4.71	TRUE
617	Thailand	4-Chiangdao#2 (Pingkong sub-district)	16	35	2008-08-26	29	44	both	Individual	4.8	4.7	4.6	4.3	4.8	4.6	N/A	N/A	4.8	4.5	37.1	4.64	TRUE
620	Thailand	4-Chiangdao#2 (Pingkong sub-district)	16	39	2008-08-26	01	37	both	Individual	4.2	4	4.1	4.1	4.3	3.5	3.6	3.5	4	4	39.3	3.93	TRUE
618	Thailand	4-Chiangdao#2 (Pingkong sub-district)	16	37	2008-08-26	29	43	both	Individual	4.9	4.7	4.6	4.7	4.8	4.8	4.3	N/A	4.8	4.5	42.1	4.68	TRUE
616	Thailand	4-Chiangdao#2 (Pingkong sub-district)	16	46	2008-08-26	15	42	both	Individual	4.5	4.6	4.4	4.7	4.7	4.8	4	4.5	4.5	4.3	45	4.5	TRUE
615	Thailand	4-Chiangdao#2 (Pingkong sub-district)	16	41	2008-08-26	15	45	both	Individual	4.8	4.7	4.8	4.8	4.8	4.7	4.3	4.3	4.7	4.8	46.7	4.67	TRUE
619	Thailand	4-Chiangdao#2 (Pingkong sub-district)	16	32	2008-08-26	01	45	both	Individual	5	4.9	4.9	4.7	5	5	4.9	5	5	4	48.4	4.84	TRUE
622	Thailand	4-Chiangdao#2 (Pingkong sub-district)	12	36	2008-08-28	04	30	both	Individual	4.8	4.7	4.8	4.4	4.7	4.7	4.1	4	4	4.5	44.7	4.47	TRUE
621	Thailand	4-Chiangdao#2 (Pingkong sub-district)	12	42	2008-08-28	02	39	both	Individual	4.8	4.6	4.6	4.3	4.6	4.8	4.6	4.5	4.5	4.5	45.8	4.58	TRUE
627	Thailand	4-Chiangdao#2 (Pingkong sub-district)	14	65	2008-09-02	14	62	both	Individual	4.9	4.7	4.8	4.9	4.8	4.8	4.9	5	N/A	5	43.8	4.87	TRUE
626	Thailand	4-Chiangdao#2 (Pingkong sub-district)	14	45	2008-09-02	14	52	both	Individual	4.5	4.7	3.7	4.3	4.5	4.5	4.4	4.5	4.7	4.3	44.1	4.41	TRUE
625	Thailand	4-Chiangdao#2 (Pingkong sub-district)	14	44	2008-09-02	29	44	both	Individual	4.7	4.7	4.7	4.6	4.5	4.8	4.7	N/A	4.8	4.5	42	4.67	TRUE
624	Thailand	4-Chiangdao#2 (Pingkong sub-district)	14	39	2008-09-02	29	40	both	Individual	4.7	4.7	4.5	4.5	4.8	4.7	5	N/A	N/A	4	36.9	4.61	TRUE
623	Thailand	4-Chiangdao#2 (Pingkong sub-district)	14	04	2008-09-02	15	43	both	Individual	4.8	4.7	5	4.9	4.9	5	4.6	4.8	4.8	4.3	47.8	4.78	TRUE
629	Thailand	4-Chiangdao#2 (Pingkong sub-district)	11	33	2008-09-03	02	38	both	Individual	4.7	4.7	4.6	4.4	4.8	4.5	4.2	N/A	N/A	5	36.9	4.61	TRUE
628	Thailand	4-Chiangdao#2 (Pingkong sub-district)	11	40	2008-09-03	04	40	both	Individual	4.8	4.4	4.7	4.6	4.9	4.5	4.4	4.5	5	5	46.8	4.68	TRUE
631	Thailand	4-Chiangdao#2 (Pingkong sub-district)	13	36	2008-09-04	03	43	both	Individual	4.8	3.9	4.4	3.8	4.3	4.3	3.8	3.3	3.7	4.5	40.8	4.08	TRUE
630	Thailand	4-Chiangdao#2 (Pingkong sub-district)	13	38	2008-09-04	02	42	both	Individual	4.7	4.7	4.6	4.4	4.7	4.8	4.3	N/A	4.5	4.5	41.2	4.58	TRUE
632	Thailand	4-Chiangdao#2 (Pingkong sub-district)	18	31	2008-09-08	03	58	both	Individual	4.8	4.7	4.6	4.7	4.9	4.7	4.4	4.8	5	4.5	47.1	4.71	TRUE
633	Thailand	4-Chiangdao#2 (Pingkong sub-district)	18	34	2008-09-09	29	34	both	Individual	4.7	4.7	4.4	4.1	4.3	4.5	3.7	5	4.7	4.5	44.6	4.46	TRUE
636	Thailand	4-Chiangdao#2 (Pingkong sub-district)	19	13	2008-09-10	03	34	both	Individual	4.8	4.9	4.9	4.8	4.9	4.7	4.8	5	4.8	5	48.6	4.86	TRUE
637	Thailand	4-Chiangdao#2 (Pingkong sub-district)	19	32	2008-09-10	02	78	both	Individual	4.9	4.7	4.7	4.3	4.7	4.7	4.3	4.5	4.8	5	46.6	4.66	TRUE
634	Thailand	4-Chiangdao#2 (Pingkong sub-district)	19	42	2008-09-10	04	32	both	Individual	4.9	4.6	5	4.5	4.9	4.7	4.3	5	5	4.5	47.4	4.74	TRUE
635	Thailand	4-Chiangdao#2 (Pingkong sub-district)	19	37	2008-09-10	03	43	both	Individual	4.8	4.4	4.3	4.7	4.7	4.7	4.7	4.3	4.8	5	46.4	4.64	TRUE
642	Thailand	4-Chiangdao#2 (Pingkong sub-district)	20	44	2008-09-11	15	36	both	Individual	4.7	4.6	4.6	4.5	4.6	4.7	4.2	4.5	4.7	4.7	45.8	4.58	TRUE
641	Thailand	4-Chiangdao#2 (Pingkong sub-district)	20	45	2008-09-11	15	38	both	Individual	4.6	4.9	4.6	4.1	4.6	4.7	4.3	4.5	4.8	4.7	45.8	4.58	TRUE
640	Thailand	4-Chiangdao#2 (Pingkong sub-district)	20	10	2008-09-11	04	45	both	Individual	4.9	5	4.9	4.7	4.8	4.8	4.9	4.8	4.8	5	48.6	4.86	TRUE
639	Thailand	4-Chiangdao#2 (Pingkong sub-district)	20	35	2008-09-11	02	60	both	Individual	4.8	4.7	4.6	4.3	4.6	4.8	4.4	N/A	4.7	4.5	41.4	4.6	TRUE
638	Thailand	4-Chiangdao#2 (Pingkong sub-district)	20	85	2008-09-11	01	40	both	Individual	4.8	4.9	4.8	4.3	5	4.7	4.5	N/A	N/A	5	38	4.75	TRUE
643	Thailand	4-Chiangdao#2 (Pingkong sub-district)	20	40	2008-09-11	29	59	both	Individual	4.8	4.7	4.3	5	4.8	4.8	N/A	N/A	3.8	4.5	36.7	4.59	TRUE
644	Thailand	4-Chiangdao#2 (Pingkong sub-district)	15	36	2008-09-16	29	70	both	Individual	4.8	4.4	4.6	4.4	4.5	4.7	4.6	N/A	4.3	4.5	40.8	4.53	TRUE
648	Thailand	4-Chiangdao#2 (Pingkong sub-district)	15	43	2008-09-16	14	53	both	Individual	4.9	4.7	4.5	4.6	4.7	4.7	4.8	4.8	4.7	5	47.4	4.74	TRUE
647	Thailand	4-Chiangdao#2 (Pingkong sub-district)	15	39	2008-09-16	14	48	both	Individual	4.7	4.7	4.7	4.8	4.8	4.7	4.6	4.5	5	4.5	47	4.7	TRUE
645	Thailand	4-Chiangdao#2 (Pingkong sub-district)	15	46	2008-09-16	15	60	both	Individual	5	4.7	4.8	4.6	4.8	5	4.8	4.8	4.3	4.5	47.3	4.73	TRUE
646	Thailand	4-Chiangdao#2 (Pingkong sub-district)	15	64	2008-09-16	15	65	both	Individual	4.3	4.7	4.7	4.7	4.8	4.8	3.9	4.3	4.7	4.7	45.6	4.56	TRUE
649	Thailand	6-Praow #2 (Sunsai&Banpong sub-district)	24	13	2008-09-24	29	36	both	Individual	4.9	4.7	5	4.7	4.4	4.8	N/A	N/A	N/A	4.5	33	4.71	TRUE
650	Thailand	6-Praow #2 (Sunsai&Banpong sub-district)	24	41	2008-09-24	29	38	both	Individual	4.8	4.7	4.8	4.3	4.7	4.8	N/A	N/A	4.8	4.5	37.4	4.68	TRUE
652	Thailand	6-Praow #2 (Sunsai&Banpong sub-district)	24	31	2008-09-24	15	46	both	Individual	4.6	4.7	4.7	4.4	4.8	4.8	4.3	4	4.8	4.3	45.4	4.54	TRUE
651	Thailand	6-Praow #2 (Sunsai&Banpong sub-district)	24	85	2008-09-24	15	45	both	Individual	4.9	4.7	4.6	4.6	4.8	5	4.1	4.3	4.2	4.5	45.7	4.57	TRUE
654	Thailand	6-Praow #2 (Sunsai&Banpong sub-district)	29	02	2008-09-30	29	33	both	Individual	4.8	4.7	4.9	4.7	4.7	4.7	4.9	N/A	5	4.5	42.9	4.77	TRUE
655	Thailand	6-Praow #2 (Sunsai&Banpong sub-district)	29	04	2008-09-30	15	45	both	Individual	4.9	4.9	4.9	4.8	4.7	5	4.7	5	5	4.8	48.7	4.87	TRUE
656	Thailand	6-Praow #2 (Sunsai&Banpong sub-district)	29	65	2008-09-30	15	40	both	Individual	4.5	4.9	4.6	4.6	4.5	5	4.3	4.8	4.8	4.8	46.8	4.68	TRUE
657	Thailand	6-Praow #2 (Sunsai&Banpong sub-district)	29	10	2008-09-30	14	40	both	Individual	4.3	4.6	4.4	4.3	4.4	4.7	4.6	4.8	4.6	4.7	45.4	4.54	TRUE
653	Thailand	6-Praow #2 (Sunsai&Banpong sub-district)	29	31	2008-09-30	29	41	both	Individual	4.7	4.9	4.8	4.6	4.8	4.8	4.7	N/A	4.8	4.8	42.9	4.77	TRUE
659	Thailand	6-Praow #2 (Sunsai&Banpong sub-district)	29	85	2008-10-06	04	40	both	Individual	4.9	5	4.6	4.4	4.8	4.7	4.7	4	4.8	5	46.9	4.69	TRUE
658	Thailand	6-Praow #2 (Sunsai&Banpong sub-district)	29	40	2008-10-06	03	42	both	Individual	4.8	4.9	4.9	4.8	4.8	4.5	4.7	5	N/A	4.5	42.9	4.77	TRUE
660	Thailand	6-Praow #2 (Sunsai&Banpong sub-district)	28	64	2008-10-07	03	57	both	Individual	4.8	4.9	4.9	4.9	4.8	4.5	4.9	5	5	4.5	48.2	4.82	TRUE
663	Thailand	6-Praow #2 (Sunsai&Banpong sub-district)	29	85	2008-10-08	03	37	both	Individual	4.8	5	4.8	4.6	4.8	4.8	4.9	5	5	4.5	48.2	4.82	TRUE
661	Thailand	6-Praow #2 (Sunsai&Banpong sub-district)	29	44	2008-10-08	04	31	both	Individual	4.8	4.7	4.7	4.3	4.9	4.3	4.1	4	4.7	5	45.5	4.55	TRUE
662	Thailand	6-Praow #2 (Sunsai&Banpong sub-district)	29	34	2008-10-08	02	26	both	Individual	4.8	4.7	4.6	4.7	4.7	4.8	4.8	N/A	4.3	5	42.4	4.71	TRUE
665	Thailand	6-Praow #2 (Sunsai&Banpong sub-district)	29	37	2008-10-09	02	30	both	Individual	4.8	4.7	4.7	4.2	4.6	4.8	4.4	N/A	4.5	5	41.7	4.63	TRUE
664	Thailand	6-Praow #2 (Sunsai&Banpong sub-district)	29	42	2008-10-09	04	45	both	Individual	4.8	4.9	4.8	4.6	4.8	4.7	4.1	5	4.8	4.5	47	4.7	TRUE
666	Thailand	6-Praow #2 (Sunsai&Banpong sub-district)	30	33	2008-10-13	03	53	both	Individual	4.8	4.3	5	4.6	4.5	4.5	4.6	4.3	4.5	5	46.1	4.61	TRUE
667	Thailand	6-Praow #2 (Sunsai&Banpong sub-district)	21	39	2008-10-14	15	31	both	Individual	5	4.9	4.9	4.6	4.7	5	4.4	4.3	4.8	4.5	47.1	4.71	TRUE
668	Thailand	6-Praow #2 (Sunsai&Banpong sub-district)	21	35	2008-10-14	15	35	both	Individual	4.9	4.7	5	4.7	4.8	4.8	4.6	5	5	4.8	48.3	4.83	TRUE
670	Thailand	6-Praow #2 (Sunsai&Banpong sub-district)	25	36	2008-10-15	02	32	both	Individual	4.8	4.9	4.6	4.3	4.8	4.8	4.4	N/A	N/A	4.5	37.1	4.64	TRUE
669	Thailand	6-Praow #2 (Sunsai&Banpong sub-district)	25	32	2008-10-15	03	35	both	Individual	4.8	4.7	4.9	4.3	5	4.7	4.6	4.3	4.7	4.5	46.5	4.65	TRUE
671	Thailand	6-Praow #2 (Sunsai&Banpong sub-district)	21	85	2008-10-16	02	48	both	Individual	4.8	4.9	4.6	4.3	4.8	4.8	4.7	4.5	4.7	5	47.1	4.71	TRUE
673	Thailand	6-Praow #2 (Sunsai&Banpong sub-district)	21	40	2008-10-20	29	46	both	Individual	4.9	4.7	5	5	4.7	4.6	N/A	N/A	4.8	4.5	38.2	4.78	TRUE
672	Thailand	6-Praow #2 (Sunsai&Banpong sub-district)	21	42	2008-10-20	29	50	both	Individual	4.8	4.7	4.8	4.6	4.8	4.8	4.6	N/A	4.8	4	41.9	4.66	TRUE
674	Thailand	6-Praow #2 (Sunsai&Banpong sub-district)	22	03	2008-10-21	15	35	both	Individual	4.9	4.7	4.7	4.8	4.8	4.8	4.6	4.5	4.7	4.7	47.2	4.72	TRUE
675	Thailand	6-Praow #2 (Sunsai&Banpong sub-district)	22	45	2008-10-22	02	45	both	Individual	4.8	4.9	4.8	4.5	4.6	4.8	4.6	N/A	4.2	5	42.2	4.69	TRUE
676	Thailand	6-Praow #2 (Sunsai&Banpong sub-district)	21	37	2008-10-27	14	51	both	Individual	4.6	4.4	4.4	4.6	4.6	4.5	4.6	4	4.3	4.3	44.3	4.43	TRUE
678	Thailand	6-Praow #2 (Sunsai&Banpong sub-district)	21	44	2008-10-27	29	47	both	Individual	4.8	4.7	4.6	4.5	4.2	4.8	N/A	N/A	4.5	4.8	36.9	4.61	TRUE
679	Thailand	6-Praow #2 (Sunsai&Banpong sub-district)	21	41	2008-10-27	29	41	both	Individual	4.8	4.4	4.8	4.6	4.8	4.8	N/A	N/A	4.7	4	36.9	4.61	TRUE
677	Thailand	6-Praow #2 (Sunsai&Banpong sub-district)	21	42	2008-10-27	14	40	both	Individual	4.8	4.7	4.7	4.8	4.6	4.7	4.4	4.8	4.7	4.7	46.9	4.69	TRUE
685	Thailand	12-Fang #4 (Monpin sub-district)	54	02	2008-11-11	15	32	both	Individual	4.8	4.9	4.9	4.8	4.8	4.8	4.4	4.3	5	5	47.7	4.77	TRUE
680	Thailand	12-Fang #4 (Monpin sub-district)	54	41	2008-11-11	29	42	both	Individual	4.8	4.9	4.8	4.7	4.7	4.7	N/A	N/A	4.8	4.5	37.9	4.74	TRUE
681	Thailand	12-Fang #4 (Monpin sub-district)	54	04	2008-11-11	29	40	both	Individual	4.8	4.7	4.7	4.8	4.6	4.8	4.6	4.8	4.7	5	47.5	4.75	TRUE
682	Thailand	12-Fang #4 (Monpin sub-district)	54	03	2008-11-11	14	50	both	Individual	4.9	4.9	4.6	4.8	4.8	4.8	4.8	4.8	4.5	4.7	47.6	4.76	TRUE
683	Thailand	12-Fang #4 (Monpin sub-district)	54	85	2008-11-11	14	40	both	Individual	4.8	4.7	4.3	4.4	4.6	5	4.4	4.5	4	4.7	45.4	4.54	TRUE
684	Thailand	12-Fang #4 (Monpin sub-district)	54	13	2008-11-11	15	26	both	Individual	4.9	4.9	4.8	4.8	4.8	5	4.9	5	4.7	5	48.8	4.88	TRUE
686	Thailand	12-Fang #4 (Monpin sub-district)	59	10	2008-11-19	29	45	both	Individual	4.8	4.7	4.8	4.8	4.8	4.8	N/A	N/A	5	4.5	38.2	4.78	TRUE
687	Thailand	12-Fang #4 (Monpin sub-district)	59	31	2008-11-21	29	52	both	Individual	4.8	4.7	4.7	4.9	4.8	4.8	5	N/A	4.7	5	43.4	4.82	TRUE
688	Thailand	12-Fang #4 (Monpin sub-district)	52	37	2008-11-27	29	35	both	Individual	4.8	4.9	4.8	4.7	4.8	4.8	N/A	N/A	4.3	4.5	37.6	4.7	TRUE
689	Thailand	12-Fang #4 (Monpin sub-district)	52	42	2008-11-27	29	39	both	Individual	4.8	4.6	4.8	4.6	4.7	4.8	4.7	N/A	N/A	4.3	37.3	4.66	TRUE
690	Thailand	12-Fang #4 (Monpin sub-district)	52	64	2008-11-27	15	46	both	Individual	4.8	4.7	4.7	4.4	4.7	5	4.3	4.5	4.7	4.4	46.2	4.62	TRUE
691	Thailand	12-Fang #4 (Monpin sub-district)	52	65	2008-11-27	15	42	both	Individual	4.7	4.7	4.7	4.4	4.7	5	4.3	4.8	4.5	4.4	46.2	4.62	TRUE
692	Thailand	12-Fang #4 (Monpin sub-district)	54	43	2008-12-02	15	40	both	Individual	4.8	4.9	4.8	4.6	4.7	4.7	4.6	5	4.6	5	47.7	4.77	TRUE
693	Thailand	12-Fang #4 (Monpin sub-district)	54	34	2008-12-02	15	36	both	Individual	4.7	4.6	5	5	4.8	5	4.8	4.3	5	4.5	47.7	4.77	TRUE
694	Thailand	12-Fang #4 (Monpin sub-district)	54	38	2008-12-02	29	67	both	Individual	4.8	4.4	4.5	4.4	4.6	4.7	4.5	N/A	3.2	4.5	39.6	4.4	TRUE
695	Thailand	12-Fang #4 (Monpin sub-district)	54	44	2008-12-02	29	38	both	Individual	4.8	4.7	4.7	4.6	4.7	4.7	4.7	N/A	4.3	5	42.2	4.69	TRUE
696	Thailand	12-Fang #4 (Monpin sub-district)	54	32	2008-12-08	14	38	both	Individual	4.8	4.9	4.6	4.6	4.7	4.8	4.7	4.4	4.6	5	47.1	4.71	TRUE
697	Thailand	12-Fang #4 (Monpin sub-district)	54	40	2008-12-08	14	32	both	Individual	4.7	4.7	4.3	4.4	4.5	4.7	4.6	4	4.8	5	45.7	4.57	TRUE
698	Thailand	12-Fang #4 (Monpin sub-district)	54	41	2008-12-14	15	41	both	Individual	4.8	4.7	4.7	4.2	4.7	4.8	4.3	4	4.5	4.7	45.4	4.54	TRUE
699	Thailand	12-Fang #4 (Monpin sub-district)	57	36	2008-12-15	02	32	both	Individual	4.8	4.7	4.4	4.1	4.6	4.8	4.3	N/A	4.3	5	41	4.56	TRUE
700	Thailand	12-Fang #4 (Monpin sub-district)	57	39	2008-12-15	02	35	both	Individual	4.7	4.6	4.8	4.3	4.7	4.8	4.4	N/A	4.7	5	42	4.67	TRUE
701	Thailand	12-Fang #4 (Monpin sub-district)	57	85	2008-12-15	04	37	both	Individual	4.8	4.6	4.8	4.6	4.6	4.8	4.2	4.5	5	5	46.9	4.69	TRUE
702	Thailand	12-Fang #4 (Monpin sub-district)	57	35	2008-12-15	03	49	both	Individual	4.8	4.9	4.3	4.7	4.7	4.7	4.8	5	4.5	4.5	46.9	4.69	TRUE
703	Thailand	12-Fang #4 (Monpin sub-district)	51	45	2008-12-16	03	39	both	Individual	4.8	4.7	4.8	4.6	4.8	4.8	4.2	4	4.5	4.5	45.7	4.57	TRUE
704	Thailand	12-Fang #4 (Monpin sub-district)	58	33	2008-12-16	04	45	both	Individual	4.8	4.9	4.6	4.4	4.9	5	4.4	4.5	4.7	4.5	46.7	4.67	TRUE
									AVG	4.74068	4.68729	4.63771	4.49619	4.68178	4.72174	4.46733	4.45714	4.61239	4.62597	43.4983	4.62178

## Sheet: PTSS IS Y-1
Entry Order	Site	Community Name	Venue	Counselor ID	Date of Evaluation	Evaluator	Session Length	Type of Session	PTSS Membership	Explains Confidentiality	Basic Skills	Guiding Goal Setting	Overall Score	Critical Incident	GRAND AVERAGE	Narrative Comments
1	Thailand	Maetang #2 (Banchang & Guidchang & In-hta-kin)	Ban-Ton-Luung	KR44	2006-04-01	CC02	120	IS	TRUE	TRUE	4.33	4.25	8.58	FALSE	4.29	FALSE
2	Thailand	N/A	Pang-Feung	KR44	2006-04-08	CC02	120	SG	TRUE	TRUE	4.33	4.25	8.58	FALSE	4.29	TRUE
3	Thailand	Chairprakama #2 (Maethalope sub district)	Pa Dang	MK30	2006-08-02	KY05	30	SG	TRUE	TRUE	3.78	4.25	8.03	FALSE	4.01	FALSE
4	Thailand	Fang #4 (Monpin sub district)	Ban Monpin	PO35	2006-08-14	KY05	50	SG	TRUE	TRUE	4.14	4.2	8.34	FALSE	4.17	FALSE
5	Thailand	Chiangdao #2 (Pingkong sub district)	Sanpong School	AW21	2006-08-18	KY05	50	SG	TRUE	TRUE	4.43	4.4	8.83	FALSE	4.42	FALSE
6	Thailand	Chairprakama #2 (Maethalope sub district)	Pa Dang Health Office	JK28	2006-09-05	KY05	30	IS	TRUE	TRUE	3.85	4.25	8.1	FALSE	4.05	TRUE
7	Thailand	Fang #4 (Monpin sub district)	Muang Chum	WP39	2006-09-14	CC02	60	IS	TRUE	TRUE	3.92	4.25	8.17	FALSE	4.08	TRUE
10	Thailand	Chiangdao #2 (Pingkong sub district)	Pang Feoung	SP14	2006-09-14	CC02	60	IS	TRUE	TRUE	4.14	4	8.14	FALSE	4.07	TRUE
30	Thailand	Fang #4 (Monpin sub district)	Muang Chum Health office	WP39	2006-09-14	CC02	60	IS	TRUE	TRUE	3.85	4.25	8.1	FALSE	4.05	TRUE
8	Thailand	Fang #4 (Monpin sub district)	Knong Hang Health Office	SS33	2006-09-19	KY05	90	IS	TRUE	TRUE	4.57	4.4	8.97	FALSE	4.49	TRUE
9	Thailand	Praow #2 (Susai & Banpong sub district)	Wat Knongpit Health Office	KM22	2006-09-26	KY05	60	IS	TRUE	TRUE	4.28	4.25	8.53	FALSE	4.26	TRUE
11	Thailand	Chairprakama #2 (Maethalope sub district)	Pa Dang Health Office	MK30	2006-10-05	KY05	50	IS	TRUE	TRUE	4.43	4.5	8.93	FALSE	4.47	FALSE
13	Thailand	Fang #4 (Monpin sub district)	Mai Ka temple	SS33	2006-10-16	KY05	60	IS	TRUE	TRUE	4.06	4.25	8.31	FALSE	4.15	FALSE
14	Thailand	Fang #4 (Monpin sub district)	Mon Pin health office	PJ36	2006-10-20	KY05	60	IS	TRUE	TRUE	3.85	4.25	8.1	FALSE	4.05	TRUE
15	Thailand	Fang #4 (Monpin sub district)	Pang Mayao health office	NW19	2006-10-25	KY05	60	IS	TRUE	TRUE	3.71	3.8	7.51	FALSE	3.76	FALSE
16	Thailand	Maetang #2 (Banchang & Guidchang & In-hta-kin)	Ton Lung health office	TT07	2006-10-25	CM03	60	IS	TRUE	TRUE	4.21	2.6	6.81	FALSE	3.4	TRUE
17	Thailand	Praow #2 (Susai & Banpong sub district)	Kham Sum Pa health office	KT20	2006-10-26	KY05	60	IS	TRUE	TRUE	4.21	3.8	8.01	FALSE	4	FALSE
18	Thailand	Fang #4 (Monpin sub district)	Bann Huay Krai	MS31	2006-10-29	KY05	60	IS	TRUE	TRUE	4.14	4.25	8.39	FALSE	4.19	TRUE
19	Thailand	Praow #2 (Susai & Banpong sub district)	Ban Sanpakhee	AW21	2006-11-02	KY05	60	IS	TRUE	TRUE	3.78	4.25	8.03	FALSE	4.01	TRUE
20	Thailand	Chairprakama #2 (Maethalope sub district)	Pa Dang	JK28	2006-11-06	CC02	60	IS	TRUE	TRUE	4.07	4	8.07	FALSE	4.03	TRUE
21	Thailand	Maetang #2 (Banchang & Guidchang & In-hta-kin)	Pang Kwang	DK13	2006-11-07	CC02	60	IS	TRUE	TRUE	3.71	4.25	7.96	FALSE	3.98	TRUE
22	Thailand	Chiangdao #2 (Pingkong sub district)	Pang Feong	NW15	2006-11-08	CM03	60	IS	TRUE	TRUE	3.21	3.6	6.81	FALSE	3.4	FALSE
23	Thailand	Mae-eye (Thaton sub district)	Wat Huay	TT07	2006-11-11	CM03	60	IS	TRUE	TRUE	4.21	3.2	7.41	FALSE	3.7	FALSE
24	Thailand	Fang #4 (Monpin sub district)	Monpin Tambol	PG35	2006-11-14	CC02	100	IS	TRUE	TRUE	4.07	4	8.07	FALSE	4.03	TRUE
25	Thailand	Praow #2 (Susai & Banpong sub district)	Ban Tamakieng	KT20	2006-11-16	CC02	90	SG	TRUE	TRUE	4.14	4	8.14	FALSE	4.07	TRUE
28	Thailand		Bann Huay Krai	MS31	2007-01-31	CM03	60	IS	TRUE	TRUE	4.64	4.6	9.24	FALSE	4.62	FALSE
27	Thailand		Bann Ton Lung	PP11	2007-01-31	CM03	60	IS	TRUE	TRUE	4.64	5	9.64	FALSE	4.82	FALSE
26	Thailand	Mae-eye (Thaton sub district)	Bann Mon Pin	PO35	2007-01-31	KY05	60	IS	TRUE	TRUE	4.14	4	8.14	FALSE	4.07	TRUE
29	Thailand		Bann Kham Sum Pa	KT20	2007-02-01	CM03	60	IS	TRUE	TRUE	4.64	4.8	9.44	FALSE	4.72	FALSE
32	Thailand	01-04-04	Bann On	SP14	2007-02-15	CM03	60	IS	TRUE	TRUE	4.5	4.6	9.1	FALSE	4.55	FALSE
33	Thailand	01-09-12	Bann Khong Hang	SS33	2007-03-20	KY05	60	IS	TRUE	TRUE	4.15	4	8.15	FALSE	4.07	TRUE
34	Thailand	01-08-10	Bann Pa Daeng	PK30	2007-03-31	KY05	60	IS	TRUE	TRUE	4.14	4	8.14	FALSE	4.07	TRUE
										AVG	4.13344	4.14062	8.27406		4.13563

## Sheet: PTSS IS Y-2
Entry Order	Site	Community Name	Venue	Counselor ID	Date of Evaluation	Evaluator	Session Length	Type of Session	PTSS Membership	Explains Confidentiality	Basic Skills	Guiding Goal Setting	Overall Score	Critical Incident	GRAND AVERAGE	Narrative Comments
35	Thailand	01-09-11	Bann Mae Ka	NS32	2007-04-25	KY05	60	IS	TRUE	TRUE	4.07	4.25	8.32	FALSE	4.16	TRUE
36	Thailand	01-02-02	Ton Lung health office	TT07	2007-05-25	CM03	40	IS	TRUE	TRUE	3.78	3.8	7.58	FALSE	3.79	TRUE
37	Thailand	01-06-09	Ban Tung Noi	PK26	2007-05-25	KY05	90	IS	TRUE	TRUE	4.28	4.25	8.53	FALSE	4.26	TRUE
38	Thailand	01-08-10	Ban Pa Daeng	JK28	2007-06-16	KY05	60	IS	TRUE	TRUE	4.42	4.25	8.67	FALSE	4.34	TRUE
39	Thailand	01-02-03	Pang Kwang school	TT07	2007-06-17	CM03	180	IS	TRUE	TRUE	4.78	4.8	9.58	FALSE	4.79	TRUE
40	Thailand	01-09-12	Ban Knong Hang	AW34	2007-06-19	KY05	60	IS	TRUE	TRUE	4.21	4	8.21	FALSE	4.11	TRUE
41	Thailand	01-04-06	Pang Ma Yao sub-district health center	TT07	2007-06-24	CM03	90	IS	TRUE	TRUE	4.64	4.62	9.26	FALSE	4.63	FALSE
31	Thailand	01-02-02	Bann Ton Loong	MC10	2007-07-02	CM03	60	IS	TRUE	TRUE	3.57	3.6	7.17	FALSE	3.58	FALSE
42	Thailand	01-06-09	Ban San Ton Mueng	KS25	2007-07-04	CC02	60	IS	TRUE	TRUE	4.28	4	8.28	FALSE	4.14	TRUE
43	Thailand	01-09-01	Pang Poi school	MS31	2007-07-12	KY05	60	IS	TRUE	TRUE	4.35	4.5	8.85	FALSE	4.43	TRUE
44	Thailand	01-02-01	Mae Ta Man school	DD46	2007-07-13	CM03	60	IS	TRUE	TRUE	4.3	4.6	8.9	FALSE	4.45	TRUE
45	Thailand	01-04-05	Ping Kong	NW15	2007-07-13	WW04	60	IS	TRUE	TRUE	3.71	3.6	7.31	FALSE	3.66	TRUE
46	Thailand	01-12-13	Monpin health center	SN37	2007-07-24	KY05	60	IS	TRUE	TRUE	3.8	4	7.8	FALSE	3.9	TRUE
47	Thailand	01-13-15	Ban Pa Tai	AG49	2007-08-06	CC02	60	IS	TRUE	TRUE	4.35	4.25	8.6	FALSE	4.3	TRUE
48	Thailand	01-06-07	Ban Kham Sum Pa	KT20	2007-08-07	KY05	60	IS	TRUE	TRUE	4.21	4	8.21	FALSE	4.11	TRUE
49	Thailand	01-02-03	Wat Pang Kwang	TT07	2007-08-11	CM03	180	IS	TRUE	TRUE	4.79	4.8	9.59	FALSE	4.8	TRUE
50	Thailand	01-09-12	Ban Knong Buak Chang	SS33	2007-08-24	KY05	60	IS	TRUE	TRUE	4.28	4.5	8.78	FALSE	4.39	TRUE
51	Thailand	01-12-12	Ban Muang Chum	WP39	2007-08-24	KY05	60	IS	TRUE	TRUE	4.5	4.5	9	FALSE	4.5	TRUE
52	Thailand	01-04-05	Trisapawakham sub-district health center	NW15	2007-09-04	CM03	60	IS	TRUE	TRUE	4.92	5	9.92	FALSE	4.96	FALSE
53	Thailand	01-09-12	Knong Hang Sub-district health center	SS33	2007-09-17	KY05	60	IS	TRUE	TRUE	4.57	4.5	9.07	FALSE	4.54	TRUE
55	Thailand	01-08-10	Ban Pa Daeng	JK27	2007-09-21	KY05	60	IS	TRUE	TRUE	4.35	4.5	8.85	FALSE	4.43	TRUE
54	Thailand	01-12-14	Ban Lan	WP39	2007-09-21	CM03	180	IS	TRUE	TRUE	4.64	4.5	9.14	FALSE	4.57	TRUE
56	Thailand	01-06-07	Ban San Pak Hee	KT20	2007-09-26	KY05	60	IS	TRUE	TRUE	4.42	4.5	8.92	FALSE	4.46	TRUE
57	Thailand	01-09-12	Wat Mae Ka	SS33	2007-10-04	KY05	60	IS	TRUE	TRUE	4.42	4.75	9.17	FALSE	4.59	TRUE
58	Thailand	01-12-14	Ban Muang Chum	PT40	2007-10-05	KY05	60	IS	TRUE	TRUE	4.5	4.75	9.25	FALSE	4.63	TRUE
59	Thailand	01-06-09	Ban Palan	PK26	2007-10-17	KY05	60	IS	TRUE	TRUE	4.5	4.75	9.25	FALSE	4.63	TRUE
60	Thailand	01-08-10	Ban Pa Daeng	JK28	2007-10-20	KY05	60	IS	TRUE	TRUE	4.64	4.75	9.39	FALSE	4.7	TRUE
61	Thailand	01-02-02	Ton Loong Sub-district health center	TT07	2007-10-24	CM03	60	IS	TRUE	TRUE	3.36	2.4	5.76	FALSE	2.88	TRUE
62	Thailand	01-12-14	Ban Knong Pai	WP39	2007-11-08	KY05	60	IS	TRUE	TRUE	4.2	4.75	8.95	FALSE	4.48	TRUE
63	Thailand	01-04-04	Pang Feong Sub-district health office	SP14	2007-11-13	CM03	60	IS	TRUE	TRUE	4.43	4.2	8.63	FALSE	4.32	TRUE
64	Thailand	01-08-10	Pa Daeng Sub-district health office	JK28	2007-11-18	CC02	60	IS	TRUE	TRUE	4.07	4.5	8.57	FALSE	4.29	TRUE
65	Thailand	01-06-08	Ban Knongpid	KM22	2008-01-06	KY05	60	IS	TRUE	TRUE	4.14	4	8.14	FALSE	4.07	TRUE
66	Thailand	01-02-02	Ban Pang Mai Daeng	SS45	2008-01-08	CM03	40	IS	TRUE	TRUE	3.36	3.6	6.96	FALSE	3.48	TRUE
67	Thailand	01-12-14	Wat Hoa Na	WP39	2008-01-11	KY05	60	IS	TRUE	TRUE	4.35	4.25	8.6	FALSE	4.3	TRUE
68	Thailand	01-04-05	Ban Maisunsern	TT07	2008-01-23	CM03	60	IS	TRUE	TRUE	3.43	3.4	6.83	FALSE	3.42	TRUE
69	Thailand	01-09-12	Ban Knongbuakham	SS33	2008-02-02	KY05	60	IS	TRUE	TRUE	4.35	4.25	8.6	FALSE	4.3	TRUE
70	Thailand	01-06-09	Ban Dong	KS25	2008-02-03	CC02	60	IS	TRUE	TRUE	4.57	4.25	8.82	FALSE	4.41	TRUE
71	Thailand	01-12-14	Wat Knong Pai	WP39	2008-02-06	KY05	60	IS	TRUE	TRUE	4.35	4.25	8.6	FALSE	4.3	TRUE
72	Thailand	01-02-03	Ban Pangkwang	TT07	2008-02-08	CM03	30	IS	TRUE	TRUE	4.43	3.8	8.23	FALSE	4.12	TRUE
73	Thailand	01-08-11	Wat Padaeng	PK30	2008-02-09	KY05	60	IS	TRUE	TRUE	4.42	4	8.42	FALSE	4.21	TRUE
74	Thailand	01-06-09	Ban Dongpaka	DS24	2008-02-16	CC02	60	IS	TRUE	TRUE	4.28	4	8.28	FALSE	4.14	TRUE
75	Thailand	01-06-08	Wat Huaysan	DS24	2008-03-01	CC02	60	IS	TRUE	TRUE	4.21	4.25	8.46	FALSE	4.23	TRUE
76	Thailand	01-06-07	Mool Village health center	KS25	2008-03-02	CC02	60	IS	TRUE	TRUE	4.42	4.25	8.67	FALSE	4.34	TRUE
77	Thailand	01-08-10	Padaeng subdistrict health office	JK27	2008-03-08	KY05	60	IS	TRUE	TRUE	4.35	4	8.35	FALSE	4.18	TRUE
78	Thailand	01-12-13	Muangchum subdistrict health office	WP39	2008-03-09	KY05	60	IS	TRUE	TRUE	4.35	4	8.35	FALSE	4.18	TRUE
79	Thailand	01-04-06	Ban Kuew hai	TT07	2008-03-19	CM03	60	IS	TRUE	TRUE	3.93	4	7.93	FALSE	3.97	TRUE
80	Thailand	01-02-01	Ban Huaynamdung	SS45	2008-03-23	CM03	60	IS	TRUE	TRUE	2.93	2.8	5.73	FALSE	2.87	TRUE
										AVG	4.23851	4.19723	8.43574		4.22

## Sheet: PTSS IS Y-3
Entry Order	Site	Community Name	Venue	Counselor ID	Date of Evaluation	Evaluator	Session Length	Type of Session	PTSS Membership	Explains Confidentiality	Basic Skills	Guiding Goal Setting	Overall Score	Critical Incident	GRAND AVERAGE	Narrative Comments
81	Thailand	01-04-05	Ban Huaychakan	TT07	2008-04-01	CM03	200	IS	TRUE	TRUE	3.29	3	6.29	FALSE	3.15	TRUE
82	Thailand	01-06-09	Ban Pawai-knonghai	KS25	2008-04-05	KY05	60	IS	TRUE	TRUE	4.2	3.6	7.8	FALSE	3.9	TRUE
83	Thailand	01-02-01	Wat Maung Kerd	TT07	2008-04-10	CM03	280	IS	TRUE	TRUE	3.29	2.8	6.09	FALSE	3.05	TRUE
84	Thailand	01-08-10	Ban Padaeng	PK30	2008-04-26	KY05	60	IS	TRUE	TRUE	4.2	3.4	7.6	FALSE	3.8	TRUE
85	Thailand	01-12-14	Muangchum subdistrict health office	WP39	2008-04-27	KY05	60	IS	TRUE	TRUE	4.7	3.6	8.3	FALSE	4.15	TRUE
86	Thailand	01-04-05	Ban Huaychakan	SS45	2008-05-10	CM03	60	IS	TRUE	TRUE	3.29	4	7.29	FALSE	3.65	TRUE
87	Thailand	01-09-12	Ban Knong Hang	SS33	2008-05-12	KY05	60	IS	TRUE	TRUE	4.14	4	8.14	FALSE	4.07	TRUE
88	Thailand	01-06-10	Wat Huay San	DB24	2008-05-14	KY05	60	IS	TRUE	TRUE	4.36	4.5	8.86	FALSE	4.43	TRUE
89	Thailand	01-13-15	Ta Makang	AG49	2008-05-15	KY05	60	IS	TRUE	TRUE	3.86	4	7.86	FALSE	3.93	TRUE
90	Thailand	01-12-14	Wat Pothong	WP39	2008-05-19	KY05	60	IS	TRUE	TRUE	4.29	4.25	8.54	FALSE	4.27	TRUE
91	Thailand	01-08-10	Padaeng sub-district health office	JK27	2008-05-25	KY05	60	IS	TRUE	TRUE	4.29	4.25	8.54	FALSE	4.27	TRUE
93	Thailand	01-02-03	Intakil Tambol Administration Organization	TT07	2008-05-29	CM03	120	IS	TRUE	TRUE	4.14	4	8.14	FALSE	4.07	TRUE
92	Thailand	01-02-03	Intakil Tambol Administration Organization	WT12	2008-05-29	CM03	120	IS	TRUE	TRUE	3.57	4.2	7.77	FALSE	3.89	TRUE
94	Thailand	01-06-08	Ban Knongcrok	DS24	2008-06-02	CC02	60	IS	TRUE	TRUE	4.28	4	8.28	FALSE	4.14	TRUE
95	Thailand	01-04-05	Ban Huay Cha Khan	TT07	2008-06-04	CM03	200	IS	TRUE	TRUE	4.07	4.2	8.27	FALSE	4.14	TRUE
96	Thailand	01-02-01	Wat Meong Khut	SS45	2008-06-06	CM03	200	IS	TRUE	TRUE	4	4.2	8.2	FALSE	4.1	TRUE
97	Thailand	01-13-15	Ta Makang sub-district health office	IS42	2008-06-11	KY05	60	IS	TRUE	TRUE	4.14	4	8.14	FALSE	4.07	TRUE
98	Thailand	01-02-01	Ban Maetaman	SS45	2008-07-01	CM03	200	IS	TRUE	TRUE	3.79	4.2	7.99	FALSE	4	TRUE
99	Thailand	01-02-03	Pang Kwang sub-district health office	TT07	2008-07-02	CM03	120	IS	TRUE	TRUE	3.71	3.4	7.11	FALSE	3.56	TRUE
100	Thailand	01-02-02	Ton Loong sub-district health office	MC10	2008-07-02	CM03	200	IS	TRUE	TRUE	3.71	3.6	7.31	FALSE	3.66	TRUE
102	Thailand	01-09-12	Ban Pakoh	SS33	2008-08-14	KY05	180	IS	TRUE	TRUE	4.57	4.5	9.07	FALSE	4.54	TRUE
101	Thailand	01-02-01	Ban Maetaman	KC08	2008-08-14	CM03	200	IS	TRUE	TRUE	4.36	4.6	8.96	FALSE	4.48	TRUE
105	Thailand	01-13-15	Tamakang sub-district health office	NW52	2008-08-15	KY05	180	IS	TRUE	TRUE	4.42	5	9.42	FALSE	4.71	TRUE
103	Thailand	01-02-03	Pang Kwang sub-district health office	PP11	2008-08-15	CM03	200	IS	TRUE	TRUE	4.36	4.6	8.96	FALSE	4.48	TRUE
104	Thailand	01-02-02	Ton Loong sub-district health office	MC10	2008-08-15	CM03	200	IS	TRUE	TRUE	4.43	4.8	9.23	FALSE	4.62	TRUE
106	Thailand	01-12-14	Ban Knongtao	WP39	2008-08-19	KY05	180	IS	TRUE	TRUE	4.71	4.75	9.46	FALSE	4.73	TRUE
107	Thailand	01-09-11	Wat Sandoinak	NS32	2008-09-15	KY05	60	IS	TRUE	TRUE	4.28	4.25	8.53	FALSE	4.27	TRUE
108	Thailand	01-12-14	Wat Muangchum	PT40	2008-09-18	KY05	60	IS	TRUE	TRUE	4.36	4.5	8.86	FALSE	4.43	TRUE
109	Thailand	01-06-07	Wat Sanpong	AS23	2008-09-20	KY05	60	IS	TRUE	TRUE	4.21	4	8.21	FALSE	4.11	TRUE
110	Thailand	01-13-15	Tamakang subdistrict health office	IS42	2008-09-24	KY05	60	IS	TRUE	TRUE	4	4	8	FALSE	4	TRUE
111	Thailand	01-08-10	Padaeng sub-district health office	JK27	2008-09-25	KY05	60	IS	TRUE	TRUE	4.28	4	8.28	FALSE	4.14	TRUE
112	Thailand	01-08-10	Padaeng sub-district health office	PK30	2008-10-04	KY05	60	IS	TRUE	TRUE	4	4	8	FALSE	4	TRUE
113	Thailand	01-09-11	Huaycri sub-district health office	MS31	2008-10-06	KY05	60	IS	TRUE	TRUE	4	4	8	FALSE	4	TRUE
114	Thailand	01-12-14	Ban Knong Tao	WP39	2008-10-07	KY05	60	IS	TRUE	TRUE	4	4	8	FALSE	4	TRUE
115	Thailand	01-13-15	Wat Muangchum	IS42	2008-10-09	KY05	60	IS	TRUE	TRUE	4	4	8	FALSE	4	TRUE
116	Thailand	01-04-04	Banhuoto Wat Mongkolnimit	SS45	2008-10-14	CM03	60	IS	TRUE	TRUE	4.43	4.4	8.83	FALSE	4.42	TRUE
117	Thailand	01-02-01	Wat Meongkut	TT07	2008-10-15	CM03	60	IS	TRUE	TRUE	3.71	3.8	7.51	FALSE	3.76	TRUE
118	Thailand	01-04-06	Pangmayao sub-district health office	TT07	2008-11-06	CM03	60	IS	TRUE	TRUE	3.93	3.1	7.03	FALSE	3.52	TRUE
119	Thailand	01-02-02	Tonloong sub-district health office	SS45	2008-11-07	CM03	60	IS	TRUE	TRUE	4.14	4.2	8.34	FALSE	4.17	TRUE
121	Thailand	01-04-06	Pangmayao sub-district health office	SS45	2008-11-25	CM03	60	IS	TRUE	TRUE	3.5	3.4	6.9	FALSE	3.45	TRUE
120	Thailand	01-02-01	Maetaman sub-district health office	TT07	2008-11-25	CM03	60	IS	TRUE	TRUE	3.86	3.8	7.66	FALSE	3.83	TRUE
123	Thailand	01-04-04	Pangfeung sub-district health office	SS45	2008-12-01	CM03	120	IS	TRUE	TRUE	4.21	4.2	8.41	FALSE	4.21	TRUE
122	Thailand	01-04-06	Pangmayao sub-district health office	NW19	2008-12-01	CM03	120	IS	TRUE	TRUE	4.5	4.4	8.9	FALSE	4.45	TRUE
124	Thailand	01-02-01	Maetaman sub-district health office	KC08	2008-12-02	CM03	120	IS	TRUE	TRUE	3.42	3.4	6.82	FALSE	3.41	TRUE
125	Thailand	01-02-02	Tonloong sub-district health office	MC10	2008-12-03	CM03	120	IS	TRUE	TRUE	4.07	3.6	7.67	FALSE	3.84	TRUE
126	Thailand	01-02-03	Pangkwang sub-district health office	PP11	2008-12-15	CM03	120	IS	TRUE	TRUE	3.42	3.4	6.82	FALSE	3.41	TRUE
127	Thailand	01-13-15	Tamakang sub-district health office	AG49	2008-12-17	KY05	60	IS	TRUE	TRUE	4	4	8	FALSE	4	TRUE
128	Thailand	01-09-11	Ban Huay cri	MS31	2008-12-19	?	60	IS	TRUE	TRUE	4.42	4.25	8.67	FALSE	4.34	TRUE
134	Thailand	01-02-05	Pangkwang sub-district health office	PP11	2009-01-06	CM03	60	IS	TRUE	TRUE	3.71	3.4	7.11	FALSE	3.56	TRUE
135	Thailand	01-13-15	Tamakang sub-district health office	AG49	2009-01-07	KY05	60	IS	TRUE	TRUE	4	4	8	FALSE	4	TRUE
136	Thailand	01-02-01	Maetaman sub-district health office	TT07	2009-01-10	CM03	120	IS	TRUE	TRUE	3.64	3.6	7.24	FALSE	3.62	TRUE
137	Thailand	01-04-04	Pangfeong sub-district health office	SS45	2009-01-11	CM03	120	IS	TRUE	TRUE	3.57	3.4	6.97	FALSE	3.49	TRUE
138	Thailand	01-02-01	Wat Meongkud	SS45	2009-01-25	CM03	180	IS	TRUE	TRUE	3.29	3.2	6.49	FALSE	3.25	TRUE
139	Thailand	01-04-06	Pangmayao sub-district health office	NW19	2009-01-27	CM03	120	IS	TRUE	TRUE	3.64	3.6	7.24	FALSE	3.62	TRUE
140	Thailand	01-02-02	Tonloog sub-district health office	MC10	2009-01-27	CM03	60	IS	TRUE	TRUE	4.5	4.6	9.1	FALSE	4.55	TRUE
129	Thailand	01-02-03	Pangkwang sub-district health office	PP11	2009-02-04	CM03	60	IS	TRUE	TRUE	4.5	4.2	8.7	FALSE	4.35	TRUE
130	Thailand	01-04-06	Pangmayao sub-district health office	NW19	2009-02-04	CM03	60	IS	TRUE	TRUE	3.78	3.6	7.38	FALSE	3.69	TRUE
131	Thailand	01-02-03	Ban Pangkud Lahu	SS45	2009-02-08	CM03	120	IS	TRUE	TRUE	3	2.2	5.2	FALSE	2.6	TRUE
132	Thailand	01-12-14	Ban Knong Pai	WP39	2009-02-16	KY05	60	IS	TRUE	TRUE	4.28	4	8.28	FALSE	4.14	TRUE
133	Thailand	01-13-15	Tamakang sub-district health office	CM51	2009-02-26	CM03	60	IS	TRUE	TRUE	4	4	8	FALSE	4	TRUE
141	Thailand	01-12-14	Ban Knongtao	WP39	2009-03-10	CM03	60	IS	TRUE	TRUE	4	4	8	FALSE	4	TRUE
142	Thailand	01-13-15	Tamakang sub-district health office	CM51	2009-03-13	CM03	60	IS	TRUE	TRUE	4	4	8	FALSE	4	TRUE
143	Thailand	01-02-03	Pangkwang sub-district health office	PP11	2009-03-19	CM03	180	IS	TRUE	TRUE	3.5	3.2	6.7	FALSE	3.35	TRUE
144	Thailand	01-02-02	Pang Huaytad	TT07	2009-03-22	CM03	120	IS	TRUE	TRUE	3.71	3.6	7.31	FALSE	3.66	TRUE
145	Thailand	01-04-06	Pangmayao sub-district health office	NW19	2009-03-23	CM03	180	IS	TRUE	TRUE	3.29	3.8	7.09	FALSE	3.55	TRUE
										AVG	3.98954	3.91615	7.90569		3.95462

## Sheet: Graph Thailand Avg Annual Score
	Year 1 (~ 1/06 - 12/06)	Year 2 (~ 1/07 - 12/07)	Year 3 (~ 1/08 - 12/08)
CM	4.28764	4.6367	4.60684
VCT	4.44342	4.52137	4.62178
PTSS IS	4.13563	4.22	3.95462
